# Supplementary material for: Origin and Loss of Nested LRRTM/α-Catenin Genes during Vertebrate Evolution
Source: PubMed Central journal article supplement (PMC3933685; doi:10.1371/journal.pone.0089910), 2014-02-24
Supplement: pone.0089910.s001.pdf [file pone.0089910.s001.pdf]

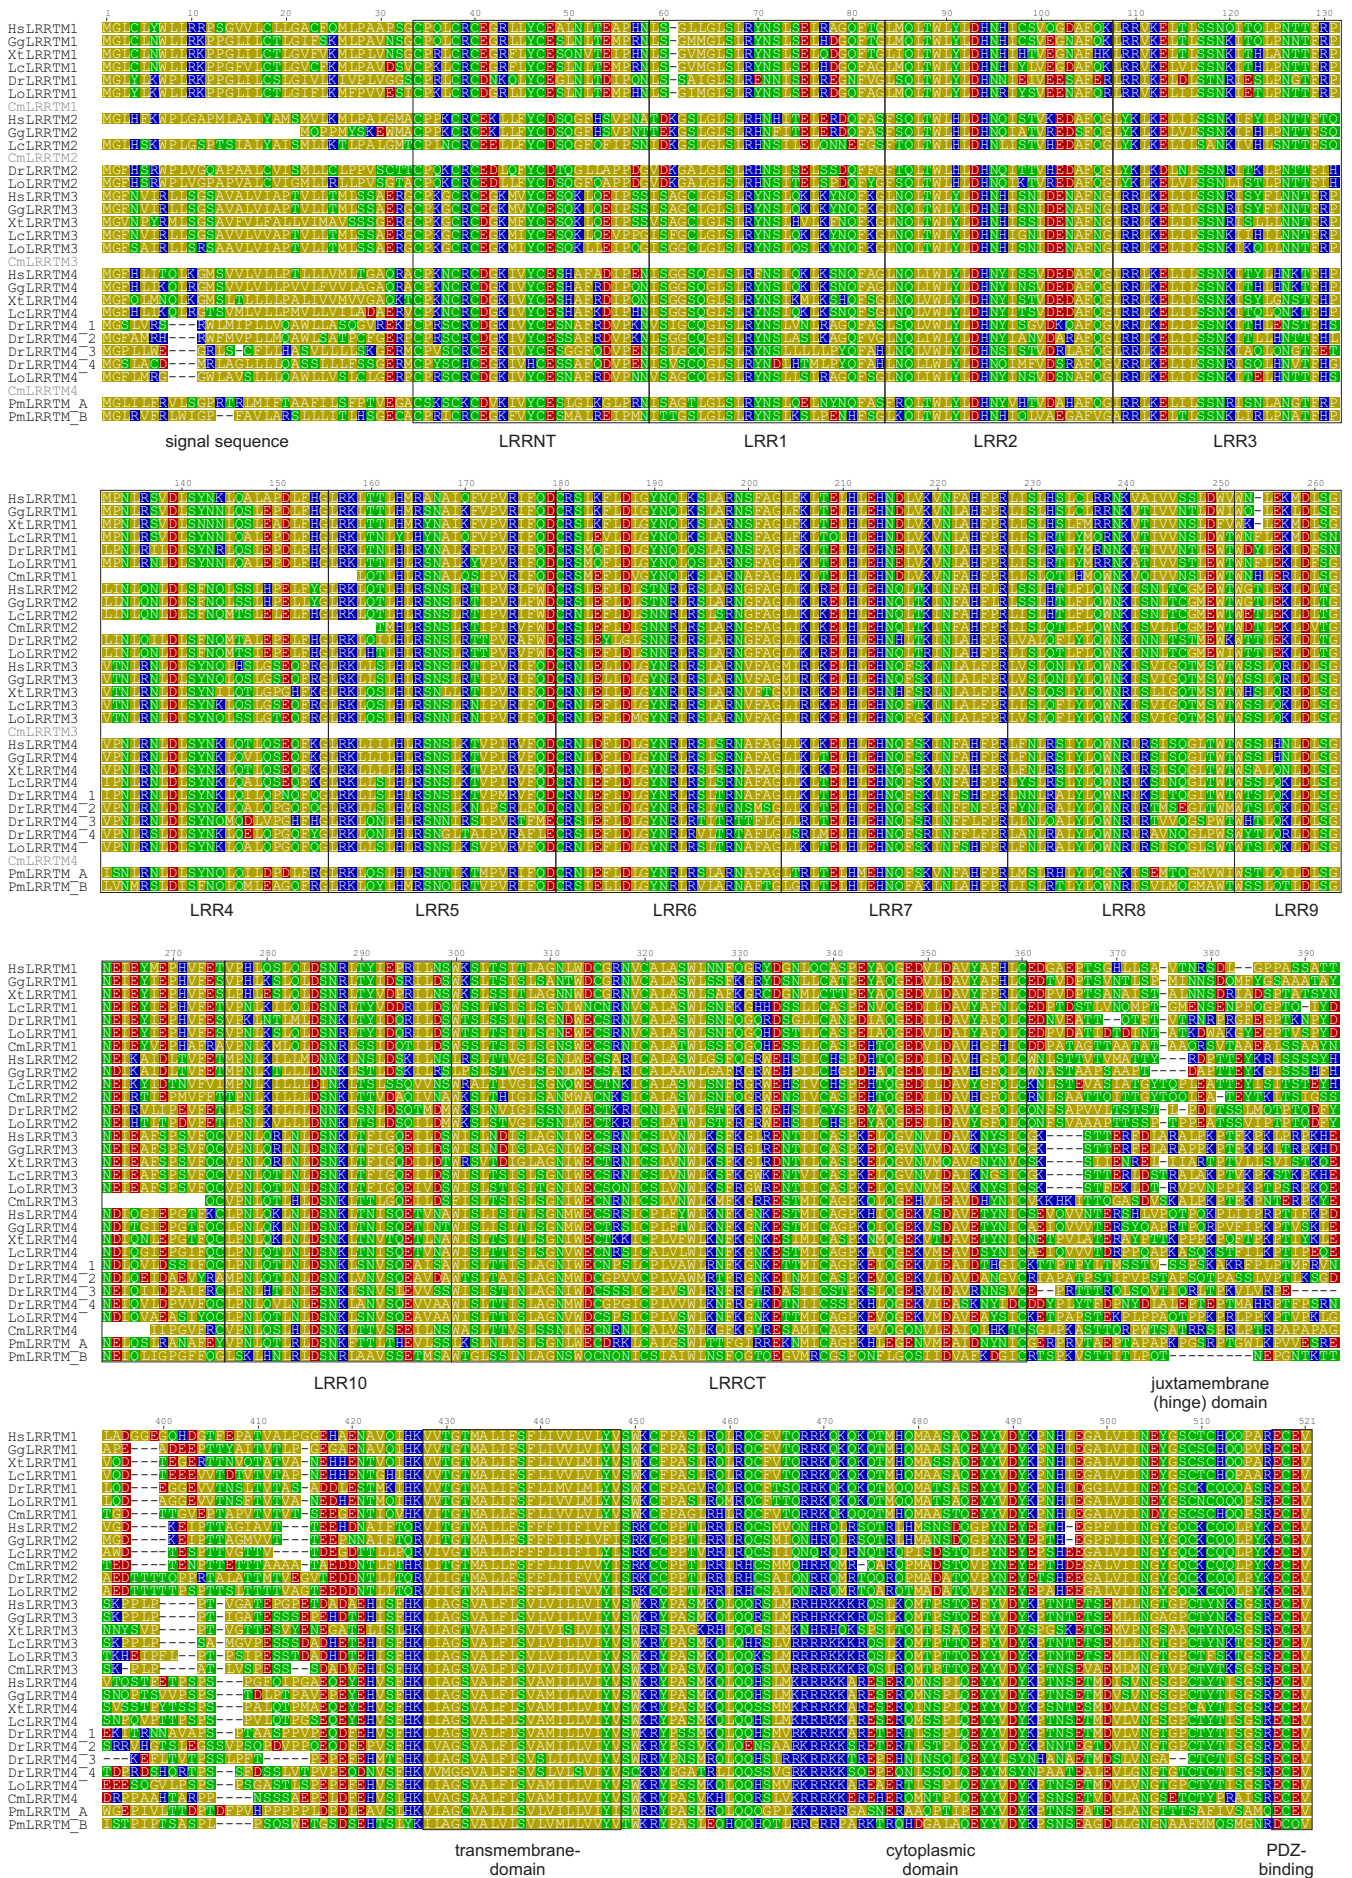

**Fig. S1.** Alignment of LRRTM family protein sequences from selected vertebrates. Amino acids are colored according to polarity and predicted domains are marked. All LRR motifs fit to the “typical” LRR-class consensus sequence [Kobe B and Kajava AV (2001) *Curr. Opin. Struct. Biol.* 11: 725-732]. Cm = *Callorhinchus milii* (elephant shark), Dr = *Danio rerio* (zebrafish), Gg = *Gallus gallus* (chicken), Hs = *Homo sapiens*, Lc = *Latimeria chalumnae* (coelacanth), Lo = *Lepisosteus oculatus* (spotted gar), Pm = *Petromyzon marinus* (sea lamprey), Xt = *Xenopus tropicalis* (African clawed frog).
