# Supplementary material for: Origin and Loss of Nested LRRTM/α-Catenin Genes during Vertebrate Evolution
Source: PubMed Central journal article supplement (PMC3933685; doi:10.1371/journal.pone.0089910), 2014-02-24
Supplement: pone.0089910.s003.pdf [file pone.0089910.s003.pdf]

| <b>a3-F</b>   |         | <b>5' -GGCTGCCAARAAYYTNATGAAYGC-3'</b> |
|---------------|---------|----------------------------------------|
| <i>ctnna</i>  | lamprey | GGCAGCCAAGAACCTGATGAACGC               |
| <i>ctnna3</i> | coelaca | GGCTGCCAAGAACTTGATGAATGC               |
| <i>ctnna3</i> | chicken | GGCTGCCAAAAATTTAATGAACGC               |
| <i>Ctnna3</i> | mouse   | GGCAGCCAAGAATTTAATGAATGC               |
| <i>ctnna1</i> | xenopus | AGCTGCGAAAAATCTGATGAATGC               |
| <i>ctnna2</i> | xenopus | GGCAGCTAAGAATTTGATGAATGC               |
| <i>ctnna1</i> | chicken | GGCGCCAAGAACCTGATGAACGC                |
| <i>ctnna2</i> | chicken | GGCAGCTAAAAATCTGATGAACGC               |

  

| <b>a3-R</b>   |         | <b>5' -GGCTTCTTTKCNNGGNGCYTTCAT-3'</b> |
|---------------|---------|----------------------------------------|
| <i>ctnna</i>  | lamprey | GGCTTCTTCTCGGGTGCTTTCAT                |
| <i>ctnna3</i> | coelaca | GGCTTTTTTTCTGGAGCCTTCAT                |
| <i>ctnna3</i> | chicken | GGCTTCTTTTCTGGAGCCTTCAT                |
| <i>Ctnna3</i> | mouse   | GGCTTCTTAGCCGGAGCCTTCAT                |
| <i>ctnna1</i> | frog    | GGTTTCTTTTCTGGAGCCTTCAT                |
| <i>ctnna2</i> | frog    | GGTTTCTTTTCAGGTGCTTTCAT                |
| <i>ctnna1</i> | chicken | GGCTTCTTCTCCGGAGCCTTCAT                |
| <i>ctnna2</i> | chicken | GGTTTCTTCTCAGGTGCCTTCAT                |

**Figure S3.** Alignment shows that the degenerate *ctnna3* forward (a3-F) and reverse (a3-R) primers have no mismatches with chicken *ctnna3* genomic sequence. Both primers have one mismatch (yellow) with the corresponding region of chicken *ctnna1* and two mismatches with chicken *ctnna2*, suggesting that the primers preferentially amplify *ctnna3*, and *ctnna1* with a higher efficiency than *ctnna2* from chicken genomic DNA.
