# Supplementary material for: Origin and Loss of Nested LRRTM/α-Catenin Genes during Vertebrate Evolution
Source: PubMed Central journal article supplement (PMC3933685; doi:10.1371/journal.pone.0089910), 2014-02-24
Supplement: pone.0089910.s004.pdf [file pone.0089910.s004.pdf]

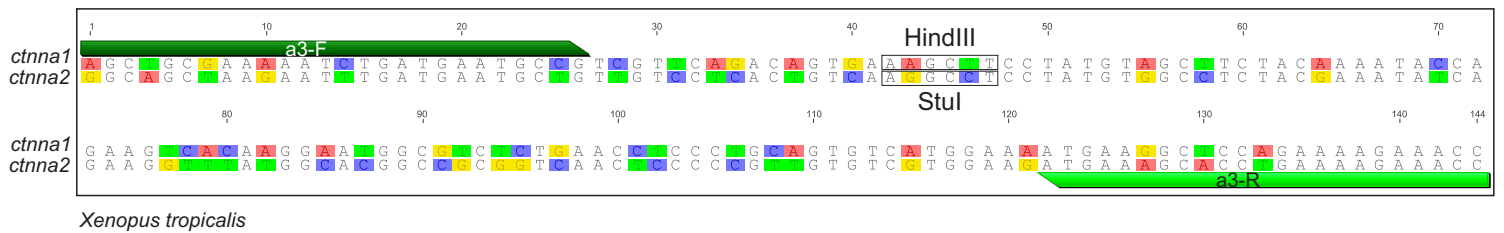

**Figure S4.** Sequence alignment of the predicted 144 bp *cttna1* and *cttna2* PCR fragments (sense strands only) obtained with primers a3-F and a3-R from the frog (*X. tropicalis*) genomic DNA. Positions of the unique *HindIII* and *Stul* restriction sites are also marked.
