# Supplementary material for: Origin and Loss of Nested LRRTM/α-Catenin Genes during Vertebrate Evolution
Source: PubMed Central journal article supplement (PMC3933685; doi:10.1371/journal.pone.0089910), 2014-02-24
Supplement: pone.0089910.s006.pdf [file pone.0089910.s006.pdf]

**Figure S6.**

Shown are best hits (accession numbers) from a BLASTP search against (PEP\_ALL) of the selected animals using the following 160 residue fragment of mouse *Nrxn1* (Refseq [NP\\_064648.3](#), residues 1184-1343) as a query:

**QKIGVKFNVGTDDIAIEESNAIINDGKYHVVRFRSGGNATLQVDSWPVIERYPAGNNDNERLAIARQRIPYRLGRVVD**  
**EWLLDKGRQLTIFNSQATIIIGGKEQGQPFQQLSGLYINGLVNMAAENDANIAIVGNVRLVGEVPSMTTESTATAM**  
 (Amino acid residues encoded by the AS4 exon are highlighted in yellow and residues encoded by the AS4-flanking exons are in blue and green)

*Drosophila melanogaster* (Dm-Nrxn FBtr0301485)

```
Query 1      QKIGVKFNVGTDDIAIEESNAIINDGKYHVVRFRSGGNATLQVDSWPVIERYPAGNND 60
              +G I + +N+G+ D+ + E      +ND YHVVRF R GGNATLQ+D + V      P
Sbjct 1257   EGNIFMVYNIGSVLDLPLGEIGTKVNDNAYHVVRFRQKGGNATLQLDDYNVQALTPQ---- 1306

Query 61     NERLAIARQRIPYRLGRVVDEWLLDKGRQLTIFNSQATIIIGGKEQ-----GQPFQGG 115
              T+FN+ + + +GGK              +PF G
Sbjct 1307   -----SHHSTVFNTMSNVQVGGKFSRNGRNRIERPFAGV 1346
```

Note that the AS4-flanking exons of mouse *Nrxn1* are homologous to exons in *Dm-nrxn* gene that are separated by a short (76 bp) intron!

*Strongylocentrotus purpuratus* (Sp-Neurx SPU\_024416)

```
Query 3      GKIGVKFNVGTDDIAIEESNAIINDGKYHVVRFRSGGNATLQVDSWPVIERYPAGNNDN 62
              G + +N G+ D I +      INDG YHV+ F+R+G NA+LQ+D + I + P
Sbjct 1144   GYLWTMYNFGSADHMISDDTNRINDGSYHVIHFRTGANASLQIDQYARIHKTP----- 1197

Query 63     ERLAIARQRIPYRLGRVVDEWLLDKGRQLTIFNSQATIIIGGKEQ-----G 108
              KG+Q T F+ QA I +GG+ +
Sbjct 1198   -----KGKQSTFFDDQAIINLGGRGEMSDSKRKRRRRAPAS 1233
```

*Sp-neurexin* gene has exons that are homologous to the AS4 flanking exons of mouse *Nrxn1*. The intron in *Sp-Neurx* between the exons is ~500 bp. Genescan analysis of this intron failed to find any putative exons (= ORFs between symmetric splice sites in the correct reading frame).

*Ciona intestinalis* (nrxn ENSCINT00000010501)

```
Query: 3      GKIGVKFNVGTDDIAIEESNAIINDGKYHVVRFRSGGNATLQVDSWPVIERYPA---GN 59
              G++ ++FN+G D+ ++E + + +DG+YH VR R NATL+VD+WP ER G+
Sbjct: 1181   GRVTLRFNIGNSDVKLQEHSPV-SDGQYHTVVRVRKWMNATLRVDNWP--ERTATTTGGS 1237

Query: 60     NDNERLAIARQRIPYRLGRVVDEWLLDKGRQLTIFNSQATIIIGGK-EQGQP-FQGQLSG 117
              D R A+A+ IP + V+ WL K T+FNSQ+ I IGG +Q P F+GQ+ G
Sbjct: 1238   RD--RFALAKPSIPTSVLSTVETWLRSEYSNTVFNSQSVIQIGLLDQSSPYFHGQMMG 1295
```

*Petromyzon marinus* (nrxn1a ENSPMAP00000006258)

```
Query: 3      GKIGVKFNVGTDDIAIEESNAIINDGKYHVVRFRSGGNATLQVDSWPVIERYPAGNNDN 62
              GKIGVKFNVGTDDIA+EE+N+++NDGKYHVVRFRSGGNATLQ+D+ PV ER+P+GN DN
Sbjct: 64     GKIGVKFNVGTDDIAVEEANSVNDGKYHVVRFRSRSGGNATLQLDNLVNERFPSGNIDN 123

Query: 63     ERLAIARQRIPYRLGRVVDEWLLDKGRQLTIFNSQATIIIGGKEQGQPFQQLSGLYING 122
              ERLA+ARQRIPYRLGRVVD+WLLDKGRQLTIFNSQATI IGGK+ +PFQQLSG+YYNG
Sbjct: 124   ERLALARQRIPYRLGRVVDWLLDKGRQLTIFNSQATIKIGGKDNNKPFQQLSGIYYNG 183
```
