# Supplementary material for: Origin and Loss of Nested LRRTM/α-Catenin Genes during Vertebrate Evolution
Source: PubMed Central journal article supplement (PMC3933685; doi:10.1371/journal.pone.0089910), 2014-02-24
Supplement: pone.0089910.s008.pdf [file pone.0089910.s008.pdf]

**Table S1.** LRRTM protein accession numbers, pI values of LRR domains, and manually curated amino-acid sequences used for the alignment.

| Protein    | pI value* | Refseq         | Ensembl              | Elephant shark genome |
|------------|-----------|----------------|----------------------|-----------------------|
| HsLRRTM1   | 7.5       | NP_849161.2    |                      |                       |
| GgLRRTM1   | 7.5       | XP_004936330.1 |                      |                       |
| XtLRRTM1   | 7.8       | XP_002935525.1 |                      |                       |
| LcLRRTM1   | 6.5       | XP_006014691.1 |                      |                       |
| DrLRRTM1   | 5.4       | XP_005160139.1 |                      |                       |
| LoLRRTM1   | 6.2       |                | ENSLACP00000013386_1 |                       |
| CmLRRTM1   | (5.9)     |                |                      | AAVX01003276.1        |
| HsLRRTM2   | 7.8       | NP_056379.1    |                      |                       |
| GgLRRTM2   | 7.9       | XP_004944826.1 |                      |                       |
| LcLRRTM2   | 7.2       | XP_006003760.1 |                      |                       |
| DrLRRTM2   | 7.3       | XP_003201382.1 |                      |                       |
| LoLRRTM2   | 6.8       |                | ENSLOCP00000022413   |                       |
| CmLRRTM2   | (8.1)     |                |                      | AAVX01197253.1        |
| HsLRRTM3   | 9.6       | NP_821079.3    |                      |                       |
| GgLRRTM3   | 9.6       |                | ENSGALP00000033454   |                       |
| XtLRRTM3   | 9.8       | XP_002936907.2 |                      |                       |
| LcLRRTM3   | 9.7       | XP_006003251.1 | ENSLACP00000012957   |                       |
| LoLRRTM3   | 9.5       |                | ENSLOCP00000014278   |                       |
| CmLRRTM3   | (7.9)     |                |                      | AAVX01197253.1        |
| HsLRRTM4   | 9.5       | NP_079269.4    |                      |                       |
| GgLRRTM4   | 9.6       | XP_417690.3    |                      |                       |
| XtLRRTM4   | 9.6       | XP_002932606.1 |                      |                       |
| LcLRRTM4   | 9.3       | XP_006004503.1 |                      |                       |
| DrLRRTM4-1 | 9.7       | XP_005172519.1 | ENSDARP00000077281   |                       |
| DrLRRTM4-2 | 9.2       | XP_692159.4    | ENSDARP00000097998   |                       |
| DrLRRTM4-3 | 8.9       | XP_697133.6    | ENSDARP00000100212   |                       |
| DrLRRTM4-4 | 8.2       | XP_001340869.4 | ENSDARP00000101739   |                       |
| LoLRRTM4   | 8.9       |                | ENSLOCP00000019846   |                       |
| CmLRRTM4   | (8.2)     |                |                      | AAVX01198974.1        |
| PmLRRTM_A  | 9.2       |                | ENSPMAP00000011013   |                       |
| PmLRRTM_B  | 9.6       |                | ENSPMAP00000007010   |                       |

\*The pI values are for the extracellular parts without the signal sequence and hinge domains. (Values for the partial shark sequences are not comparable).

>HsLRRTM1

MDFLLLGLCLYWLRRPSPGVVLCLLGACFQMLPAAPSGCPQLCRCEGRLLYCEALNLTAPHNLSGLLGLSLRYNSLSELFRAGQFTGLMQL  
TWLYLDHNHICSVQGDFAFKLRRVKELTSSNQITQLPNTTFRPMPNLRSDLSYNKLQALAPDLFHGLRKLTTLHMRANAIQFVVPVRI  
DCRSLKFLDIGYNQLKSLARNSFAGLFKLTTELHLEHNDLVKVNFAHFPRILSLHSLCLRRNKVAIVVSSLDWVWNLEKMDLSGNEIEYMEP  
HVFETVPHLQSLQLDSNRLTYIEPRILNSWKSLSITLAGNLWDCGRNVCALASWLNQFGRYDGNLQCASPEYAQGEDVLDVAVYAFHLCE  
DGAEPSTGHLLSAVTNRSDLGPPASSATTLADGGEGQHDGTFEPATVALPGGEHAENAVQIHKVVTGTMALIFSFLLIVVLVLYVSWKCFPA  
SLRQLRQCFTVQRRKQKQKQTMHQMAAMSAQEYVVDYKPNHIEGALVINEYGSCTCHQQPARECEV

>GgLRRTM1

MDFLLIGLCLNWLRLKPPGLIILCTLGIFSKMLPAVNSGCPQLCRCEGRLLYCESLNLTEMPNLSGMMGLSLRYNSLSELHDGQFTGLMQL  
TWLYLDHNHICSVQGNFAFKLRRVKELTSSNKITQLPNTTFRPMPNLRSDLSYNLQSLPDLFHGLRKLTTLHMRANAIKFPVPRIFQ  
DCRSLKFLDIGYNQLKSLARNSFAGLFKLTTELHLEHNDLVKVNLAHFPRILSLHSLCLRRNKVTIVVNTLDWIWQLEKLDLSGNEIEYIEP  
HVFESVPHLQSLQLDSNRLTYIDSRILDSWKSLSITSLANTWDCGRNVCALASWLSFFKGRYDNLCCATPEYAQGEDVLDVAVYAFHLCE  
DTVDPTSVNTLSPMINNSDQMGFYGSAATAYAPEADEEPTTYAITVTLPGEGAENAVQIHKVVTGTMALIFSFLLIVVLVLYVSWKCFPAS  
IRQLRQCFTVQRRKQKQKQTMHQMAAMSAQEYVVDYKPNHIEGALVINEYGSCTCHQQPARECEV

>XtLRRTM1

MDFLLIGLCLNWLRLKPPGLILCTLGVFVKMLPLVNSGCPRLCRCEGRFLYCESQNVTEIPHNLGVMGLSLRYNSLSELQDQGFTGLIQL  
TWLYLDHNNIYLVVEGDAFQKLRVVKELVLSNKIETHLPNTTFRPMPNLRVSDLSNNLQSLQLEADLFHGLRKLTTLHMRYNAIKFVVRIFQ  
DCRSKFLDLGYNQLKSLARNSFAGLFKLTLEHLEHNDLVKVNLAHFPRLLSLHSLFMRRNKVTIIVNSLDFVVKLEKMDLSGNEIEYIEP  
HVFESLPHLESQLDNSRLTYVDRILDSWSSLTISLISGNIWNCNRNVCALASWLSAFKGRCDGNMLCTTPEYAQGEDVLDVAVYFRLCD  
DPVDPTSANAISTALNNSDRIAIDSPTATSYNVQDTEGERTTNVQTATVANEHHEHTVQIHKVVTGTMALIFSFLIVVLMVLYVSWKCFPAS  
LRQLRQCFTVTRRQKQKQKQTMHQMASMSAQEYVYDYKPNHIEGALVIINEYGSCSCHQQPARECEV

>LcLRRTM1

MDFLLLGLCLNWLRLKPPGFVLCITLGVCFKMLPAVDSVCPKLCRCEGRFLYCESLNLTEMPRNLGVMGLSLRYNSLSELHDGQFAGLMQL  
TWLYLDHNNIYLVVEGDAFQKLRVVKELVLSNKIETHLPNTTFRPMPNLRVSDLSYNNIQALEPDLFHGLRKLTTNLYLHYNAIQFVVRIFQ  
DCRSLEVLDLGYNQLKSLARNSFAGLFKLTQLEHLEHNDLVKVNLAHFPRLLSLRSLTYMQRNKVTIIVNSLDTWVNFLEKMDLSNNEIEYIE  
PHVFETVPLNKILQLDSNRLTYVDRILDSWSSLTISLISGNIWNCNRNVCALASWLSNFKGHDSLLCASPENVQGEDILDVAVYAFNLC  
EDPTDSTLVNQMPGTGMENSENPFQDQPTQIYDVQDTEEEVVTDTVTVTAPNEHHEHTGHIHKVVTGTMALIFSFLIVVLMVLYVSWKCFPAS  
LRQLRQCFTVTRRQKQKQKQTMHQMASMSAQEYVYDYKPNHIEGALVIINEYGSCSCHQQAARECEV

>DrLRRTM1

MDFLLIGLYLKWPLRLKPPGLILCSLGIIVLKVPLVGGSCPRCLCRCDNKQLYCEGLNLTDIPOQLSSAIGLSLRENNISELREGNFVGLSOL  
TWLYLDHNNIYLVVEEFAFERLRRIKELDLSTNRIESLPGNTFRPLPNLRILDLSYNNLQALEPDLFHGLRKLTTNLYLHYNAIKFVVRIFQ  
DCRSMQFVLDLGYNQQLSARNSFAGLFKLTLEHLEHNDLVKVNLAHFPRLLSLRSLTYMRRNKATIVVNTLEWTWVDFLEKIDFSNNEIEYIE  
PHVFESVPLKNTLMLDSNRLTYIDQRILDSWSSLTISLISGNIWNCNRNVCALASWLSNFKGQGRDSSLLCASPENVQGEDILDVAVYAFNLC  
EDNVEATQTTFTVTRNRPRGFIEYEGPTKNPYDLQDMEGGEVVTNSLTVTASADDESTMKIHKVVTGTMALIFSFLIMVLMVLYVSWKCFPA  
GVRQLRQCFTVTRRQKQKQKQTMHQMASMSAQEYVYDYKPNHIEGALVIINEYGSCSCHQQAARECEV

>LoLRRTM1

MDFLLIGLYLKWPLRLKPPGLILCTLGIFLKMFPVVEESICPKLCRCDGRLLYCESLNLTEMPHNLGIMGLSLRYNSLSELRDGQFAGLMQL  
TWLYLDHNNIYLVVEENAFQRLRRVKELILSSNKIETLPNTTFRPMPNLRNLDLSYNNLQALEPDLFHGLRKLTTNLYLHYNAIKFVVRIFQ  
DCRSMQFVLDLGYNQQLSARNSFAGLFKLTLEHLEHNDLVKVNLAHFPRLLSLRSLTYMRRNKATIVVNTLEWTWVDFLEKIDFSNNEIEYIE  
PHVFESVPLKNTLMLDSNRLTYIDQRILDSWSSLTISLISGNIWNCNRNVCALASWLSNFKGQGRDSSLLCASPENVQGEDILDVAVYAFNLC  
EDPVDATIDTIDINTATKDWAKGYSKEGPTVSPYDLQDAGGEVVTNSLTVTANEDHEHTMQIHKVVTGTMALIFSFLIVVLMVLYVSWKCFPA  
ASLRQMRQCFTVTRRQKQKQKQTMHQMASMSAQEYVYDYKPNHIEGALVIINEYGSCSCHQQAARECEV

>CmLRRTM1

LQTLHLRSNALQSIIPVRIQDCRSMEFLDVGYNQLKSLARNAFAGLLKLTLEHLEHNDLVKVNFAHFPRLLSLQTLHMQWNVQIIVNSLE  
WTWNHLERLDLSGNEIEYVEPHAFRAVPLNKMLQLDSNRLSSIDQITILDSWSSLTISLISGNSWECNRNICALATWLSQFQGHESLLCA  
SPEHTQGEDVLDVAVHGFHICDDLDSTPATAGTTAATAAQRSVTAAGEALSSAAANTGDTTGEVPTAPVTVTSEEGSPEPRENTIQV  
HKVITGTMALIFSFLIVVLMVLYVSWKCFPAGLRHLRQCFTVTRRQKQKQKQTMHQMASMSAQEYVYDYKPNHIEGALVIINDYGSCHQQA  
SRECEV

>HsLRRTM2

MGLHFKWPLGAPMLAAIYAMSVLKMPLALGMACPPKCRCEKLLFYCDSQGFHSPVNPATDKGSLGLSLRHNHITELERDQFASFSQTLWLH  
LDHNQISTVVEDAFQGLYKLEKILSSNKIFYLPTNTTFTQLINLQNLDSLFSNQLSSLHPELFYGLRKLQTLHLRSNSLRTIPVRLFWDCRS  
LEFLDLSTNRLSLARNGFAGLIKRELEHLEHNLTKINFAHFLRSLSLHTLFLQWNKISNLTGMEWTWGTLEKLDLTGNEIKADLTVF  
ETMPNLKILLMDNNKLSLSDSKILNSLRLSTTVGLSGNLWECARSICALASWLSGFSQGRWEHSILCHSPDHTQGEDILDVAVHGFQLCWNL  
TTVTVMATTYRDPTEYTKRISSSYHVGDKEIPTTAGIAVTTTEHFPEDNAIFTQRVITGTMALIFSFFFIIFIVFISRKCCPPTLRRIR  
RQCSMVQNRHLRQRLSQTRLHMSNMDSQGPYNEYEPTHEGPFIIINGYGQCKCQQLPYKECEV

>GgLRRTM2

MQPPMYSKEWMACPPKCRCEKLLFYCDSQGFHSPVNPTEKGSGLSLRHNHITELERDQFASFSQTLWLHLDHNQIATVREDSFQGLYKLE  
ELVLSNKIIFHLPNTTFSQLLNLQNLDSLFSNQLSSLHPELFLYGLRKLQTLHLRSNSLRTIPVRLFWDCRSLEFLDLSTNRLSLARNGFAG  
LIKRELEHLEHNLTKINFAHFLRSLSLHTLFLQWNKISNLTGMEWTWGTLEKLDLTGNDIKADLTVFETMPNLKTLNLDNNKLSLDS  
KILRSLSLSTVGLSGNLWECARSICALAAWLGAFRGRWEHPILCHGPDHAQGEDILDVAVHGFQLCWNASAAAPSAAPTAPTEYTKGIS  
SSHFMGDKEIPTTAGMVVTEEPFPEPNNAIFTQRVITGTMALIFSFFFIIFIVFISRKCCPPTLRRIRQCSMIQNRHLRQRLSQTRLHMAN  
MSDQGPYNEYEPTHEGPFIIINGYGQCKCQQLPYKECEV

>LcLRRTM2

MGLHKSQWPLGSPSIALYASMLLKTLPALGMTCPNCRCEELLFYCDSQGFQFIPSNIDKGSGLSLRHNSILELQNEFGSFTQTLWLH  
LDHNLISTVVEDAFQGLYKLEKILSANKIVHLSNTTFSQLLNLQNLDSLFSNQLSSLELFLHGLRKLQTLHLRSNSLRTIPVRLFWDCRN  
LEFLDLSTNRLSLARNGFAGLIKRELEHLEHNLTKINFAHFLRSLSLHTLFLQWNKISNLTGMEWTWGTLEKLDLTGNEIKYIDTNV  
VIMPNLKILLLDNNKLSLSDSKILNSLRLSTTVGLSGNLWECARSICALASWLSNFRGRWEHSIVCHSPEHTQGEDILDVAVYGFQLCQNF  
TEVASIATGYTDATQPLEATTEYEISITSTEYHAWDTEPTTVGTVTDEGSLEPDTTLLPQRVIVGTMALIFSFFFIIFILYLSRKCCP  
TVRRIRQCSIIQNRQRLNRQRPISDLSTQLPYNEYEPTHEGALVIINGYGQCKCQQLPYKECEV

>DrLRRTM2

MGFHSRWPLVGPAPALCVISMLLCLPPVSCSTTCPQKCRCELDQFYCDTQGLLAPPDGVDKAGLGLSLRHNSISELSSDQFFGFTQTLWLH  
LDHNQITVVEDAFQGLYKLEKILSSNRIKLPNTTIFHLINLQNLDSLFSNQLSSLELFLHGLRKLQTLHLRSNSLRTIPVRAFWDCRS  
LEYLGLSNRRLSLARNGFAGLIKRELEHLEHNLTKINLAHFPRLLVALQFLYLQWNKINNLSTMEWKTWTTLEKLDLTGNEIRVLIPEVF  
ETLPSLKILLLDNNKLSLSDSKILNSLRLSTTVGLSGNLWECARSICALASWLSNFRGRWEHSIVCHSPEHTQGEDILDVAVYGFQLCQNF  
APVLTSTSTEAMLPDITSSLFGNMQPTQDFYAEDFGSFTIVTTTTTTTQPRTALATMTVEGADVTEYDYSAMDNTLLTQRVITGTMAL  
IFSFFFIIFVVIYISRKCCPPTLRRIRHCSAIQNRQMRQQRQPMADLATQVPYNEYEPTHEGALVIINGYGQCKCQQLPYKECEV

>LoLRRTM2

MGFHSRWPLVGPAPVALCVIGMLLRLLPVSGTACPKCRCELDLQFYCDSQGFQAPPDGDVKGALGLSLRHNSITELSPDQFYGFQTLWLH  
LDHNQIKTVVEDAFQGLYKLEKILSSNLI STLNTTIFHLINLQNLDSLFSNQLSSLELFLHGLRKLQTLHLRSNSLRTIPVRAFWDCRS  
LEFLDLSTNRLSLARNGFAGLIKRELEHLEHNLTRINLAHFPRLLVALQFLYLQWNKINNLSTMEWIKWTTLEKLDLTGNEIHTLTPDVF  
ETLPLNKILLLDNNKLSLSDSKILNSLRLSTTVGLSGNLWECARICSLATWLSFRGRWEHSILCHSPEHTQGEDILDVAVYGFQLCQNF



VVVTERSYPQAPRTPQRPVFIKPKPTVSKLESNQPTSVVPSSTDLPTPAVEPEYEHVSFHKIIAGSVALFSLVAMILLVIYVSWKRYPASMK  
LQOQHSLMKRRRKKARESERQMNSPLQEYYVDYKPTNSETMVSVNGSGPCTYTISSGRECEV

>XtLRRTM4

MGFQLMNLQKGMSTLTLPLALIVVMVGAQKTCPKNCRCDGKIVYCESHAFRDIPQNISGGSQGLSLRYNSIKMLKSHQFSGNLQVLWLY  
LDHNYISTVDEDAFQGIIRRLKELIILSSNKISYLGNSTFHPVPLNRLNLDLSYNKQLQALQSEQFKGLRKLKLLHLRNSNLKTVVRFQDCRN  
LDFLDLGYNRLRSLSRNAFAGLLKLELHLEHNQFSKVNFAHFPRFLNRLSRYLQWNRIRSIQGLTWTWSALQNLDLSDGNDIQNLEPGTF  
QCLPNLQKLNLDNSKLTNTVQETLNAWISLTSITLSGNIWECTKKICPLVFWLKNFKGNKESIMICASPKNMQGEKVTDAVETYNICNETP  
VLATERAYPTTKPPKPKPTIYKLESVSSPTTSSPSPALQTPMAEQEYEHVSFHKIIAGSVALFSLVAMILLVIYVSWKRYPASMK  
LQOQSSMMKRRRKKARESERQINSPLQEYYVDYKPSNTEMSDVLVNGSGPCAYTISGRECEV

>LcLRRTM4

MGFHLIKQLRGTSVMLVLLPMLVILADAERVCPKNCRCGKIVYCESHAFKDI PHNISGGSQGLSLRYNSIQKLSNQFSGNLQVLWLY  
LDHNYITSVDEDAFQGIIRRLKELIILSSNKITQLQNKTFHPINPLNRLNLDLSYNKQLQALQSEQFKGLRKLKLLHLRNSNLKTVIRVQDCRN  
LEFLDGYNRLRSLSRNAFAGLLKLELHLEHNQFSKVNFAHFPRFLNRLSRYLQWNRIRSIQGLTWTWSALQNLDLSDGNDIQNLEPGTF  
QCLPNLQTLNLDNSKLTNISQETVNAWISLTTISLGNVWECNRSICALVWLKNFKGNKESTMICAGPKAIQGEKVMVAVDSYNICAEIQ  
VVVTRDRPQAPKASQKSTFILKPTIPEQESNPQVPTTSSPSPVLQTPGSEQEYEHVSFHKIIAGSVALFSLVAMILLVIYVSWKRYPASMK  
LQOQHSMLMKRRRKKARESERQMSSPLQEYYVDYKPTNSETMVSVNGSGPCTYTISSGRECEV

>DrLRRTM4\_1

MGSLVRSRWLMIPLLVQAWLLASQGRVREKPCPRSCRCGKIVYCESNAFRDVPKNVSIQCQGLSLRYNSLVNLRAGQFASLSQLVWLYLD  
HNYISGVQKQAFQGVRRKELIILSSNKITHLENSTFHSIPNLRNLDLSYNKQLQALQSEQFKGLRKLKLLHLRNSNLKTVMPRVFQDCRNLE  
LDLGYNRLRSLTRNSMSGLLKLELHLEHNQFSKINFFSHFPRFLNRLSRYLQWNRIRSIQGLTWTWSALQNLDLSDGNDIQNLEPGTF  
LPLNQLTLNLDNSKLSNVSQEAISAWISLTTISLAGNIWECNPSCLPLVAVLWLNFKGNKETTMCAGPKEIQGEKVEIAIDTHGICKTTPTP  
YLTMSSTVSSPSKAKRFPLPTMFRVNEKIRNNAVAPSPAAAPVPEQDFEHVSFHKIIAGSVALFSLVAMILLVIYVSWKRYPSSMKQL  
QQHSMVRKRRKKARETERTLSSPLQEYYVDYKPTNSETMVSVNGSGPCTYTISSGRECEV

>DrLRRTM4\_2

MGFAMRHRWFVPLLMQAWLSATPCFGERPCPRSCRCGKIVYCESSAFRDVPKNLSGGCQGLSLRYNSLASLKAGQFVGLNQLIWLWLYLDH  
NYIANVDARAFQGIIRRLKELIILSSNKITLHNTTFHLPVPLNRLNLDLSYNKQLQALQSEQFKGLRKLKLLHLRNSNLKTVMPRVFQDCRNLE  
LDLGYNRLRSLTRNSMSGLLKLELHLEHNQFSKINFFSHFPRFLNRLSRYLQWNRIRSIQGLTWTWSALQNLDLSDGNDIQNLEPGTF  
PNLQTLNLDNSKLSNVSQEAIVDAWTSALTAISLAGNMWDCGPPVCPVAVLWLNFKGNKETTMCAGPKEIQGEKVEIAIDTHGICKTTPTP  
STIFVPSTPFVAFSQTPASSLVPTLKSQDSRRVHGTSLGEGTSSVPSQDPVPPQEQDFEPVVSFHKIIAGSVALFSLVAMILLVIYVSWKRY  
PSSVKQLQENSAARKRRRKSRETERTLSTPLQEYYVDYKPNNTTEGTDVLVNGSGPCTYTISSGRECEV

>DrLRRTM4\_3

MGPLLEWEGRLSCFLLHASVLLLLSKGERMCPVSCRCEGKIVYCESGGFQDVPENISLGCQGLSLRYNSLILLPYQFAHLNQLVWLYLDH  
SISTVDRLAFQGLRRLKELIILSSNKIAQLQNGTFETVPLNRLNLDLSYNKQLQALQSEQFKGLRKLKLLHLRNSNLKTVMPRVFQDCRNLE  
LDLGYNRLRSLTRNSMSGLLKLELHLEHNQFSKINFFSHFPRFLNRLSRYLQWNRIRSIQGLTWTWSALQNLDLSDGNDIQNLEPGTF  
NLHTLNLESNKISNVSEVSSWISISTINLAGNIWDCSSSICPLVSWLKNFRGTRDASIIICSTPKSLQGERVMDAVRNNNSVCEPRTTTRQ  
LSQVTHIQRLLTPKLVLPVPEKEFLTVTPSSLPFTPEPEFHEMTHFKIIAGSVALFSLVSLILLVIYVSWRRYPNSMRQLQOHSIRKRRK  
KTREPEHNINSQLQEYYLSYNHANAETMDSLNGACTCTISSGRECEV

>DrLRRTM4\_4

MGSLACDMRLAGLLLLQASLLLFSSGERMCPYSCHCEGKIVHCESSAFQDVPENISVSCQGLSLRYNDLHTMLPYQFAHLNQLVWLYLDH  
NQIMFVDSRAFGVRRKELIILSSNRISQLHNVTFHGVPNLRNLDLSYNKQLQALQSEQFKGLRKLKLLHLRNSNLKTVMPRVFQDCRNLE  
LDLGYNRLRSLTRNSMSGLLKLELHLEHNQFSKINFFSHFPRFLNRLSRYLQWNRIRSIQGLTWTWSALQNLDLSDGNDIQNLEPGTF  
PNLQVNLNLESNKLSNVSEVVAWISLTTISLAGNMWDCGPGICPLVWLNFKGNKETTMCAGPKEIQGEKVEIAIDTHGICKTTPTP  
QSPYLQTFDPNYDLALEPTEPTMAPTTPPPPLPSPASEAFPPQPRPPHRPTPFSRTNTDPRDHSQRTPSSFDSSLVTPVPEQDNVVSFH  
KVMGGVALFFSVSLVSVIYVSCRYPGATRLQLQSSVGRKRRRKSQEPQNLSSQLQEYYMSYNPAATPEALEVLGNGTGTCTCTISSG  
RECEV

>LoLRRTM4

MGFLMRGGWLAVALLLQAWLLVSLCGERPCPRSCRCGKIVYCESNAFRDVPNNVSAGCQGLSLRYNSLRLSRAQFSGNLQVLWLYLDH  
NYINSVDSNAFQGIIRRLKELIILSSNKITELHNTTFHSPVPLNRLNLDLSYNKQLQALQSEQFKGLRKLKLLHLRNSNLKTVMPRVFQDCRNLE  
LDLGYNRLRSLTRNSMSGLLKLELHLEHNQFSKINFFSHFPRFLNRLSRYLQWNRIRSIQGLTWTWSALQNLDLSDGNDIQNLEPGTF  
PNLQTLNLDNSKLSNVSEVAWISLTTISLAGNVWDCSPSICPLVSWLKNFKGNKETTMCAGPKEIQGEKVMVAEAYSICKETPAPS  
TEKPLPPAQTTPKPRLPKPTVPLGEEESQGVLPSPSPGASTLSPEPEFHEVVSFHKIIAGSVALFSLVAMILLVIYVSWKRYPSSMKQL  
QQHSMVRKRRKKAREAERTLSSPLQEYYVDYKPTNSETMVSVNGSGPCTYTISSGRECEV

>CmLRRTM4

IIPGVFRCPVNLQSLHLDNSKLTTVSEEILNSWASLTTVSLSSNIWECNRSICALVSWLKGFKGYRESAMICAGPKPVQGNVLEAIQLHK  
TCSGLPKASTTQRPWTSQATRRSPRLPTRPAPAPAGDRPPAHTARPPNSSAEPDLDFEHVSLHKIVAGSAALFSLVAMILLVIYVSWKR  
YPASVKHLQQRSLVKRRRKKEREHERQMNTPLQEYYVDYKPSNSETVDVLANGSETCTYPRAISRECEV

xxxxIGVSLSLSPNTGPPVLSVASLGLMATICVSAARVCPRTCRCDGKIVYCESQALLEIPPNISGSLGLSLRYNSIKSLRPSQFSGLN  
QLTWLYLDHNLQGVDFEAFQGIIRRLKELIILSSNKIARLHNVTFHPVPLNRLNLDLSYNKQLHLLQPPQFKGLRKLKLLHLRNSNLKTVMPRV  
FQDCRNLEFLDLGYNRLRNLARNVFAGLMKLELHLEHNQFSKINLSHFPRFLSRLTLYLQWNRIRVFSQGMSTWSSLQKLDLSDGNEIQA  
IIPGVFRCPVNLQSLHLDNSKLTTVSEEILNSWASLTTVSLSSNIWECNRSICALVSWLKGFKGYRESAMICAGPKPVQGNVLEAIQLHK  
TCSGLPKASTTQRPWTSQATRRSPRLPTRPAPAPAGDRPPAHTARPPNSSAEPDLDFEHVSLHKIVAGSAALFSLVAMILLVIYVSWKR  
YPASVKHLQQRSLVKRRRKKEREHERQMNTPLQEYYVDYKPSNSETVDVLANGSETCTYPRAISRECEV

>PmLRRTM\_A

MGLILFRVLSGPRTRLMIFTAAFIILSFPTEVEGACSKSCKCDVKIVYCESLGLKGLPRNISAGTGLSLRYNSLQELNQNQFASFRQLTWLY  
LDHNYVHTVDAHAFQGIIRRLKELIILSSNRISNLANGTFRPISNLRNLDLSYNKQLQILDPDLFRGLRKLKLLHLRNSNLKTVMPRVFQDCRN

LEFLDLGYNRLRSLARNAFAGLTRLTELMHEHNQFSKVNFAHFPRMLSLRHLYLQGNKISEMTQGMVWIWSTLQILDLSGNEHQSLRANAF  
EYVFNLQTLRLDSNKFTTLTHEVLSLKLNLISLSGNLWECDRKLCALGSWLTTFGIRREKNMICAGPKHLEGENVMEADNYNICGERP  
RVTAEPAPAPKPGSRPTGWLKPVVESRIEWGEPVLTTPADFPVHPPPPPLDPLEAVSLHKVIAGCVALLSVLVILLVIYSWRRY  
PAMRQLQQGPLAHHRRQKRRRRGASNERAAQPTIPLEYYVDYKPTNSEATEGLANGTTTHCSAFIVSAMQECEV

>PmLRRTM\_B

MGLRVFRLWIGPFAVLARSLLLIHLHSGECACPRICRCEGKFVYCESMALREIPMNITGSLGLSLRYNSLKSLENHFSGLKQLTWLYLD  
HNHIQLVAEGAFVGGARRLKELTLSNKLIRLPNATFHPLVNMRLDISFNQLQMLEAGQFRGLRKLQYLHMRSNQLRTVPVRFQDCRSIE  
LLDLGYNRLRVLARNAFTGLGRLTEHLHLEHNQFAKLNLAHFPRLISLRTLYLQWNRISVLMQGMATWSSLQTLDLSGNEIQLIGPGFFQG  
LSKLHNLRLDSNRLAAVSETMSAWTGLSSNLNLAGNSWQCQNQCISIAIWLNSFQGTQEGVMRCGSPQNFQGSIIDVAFKDGICRTSTVS  
AAEIPKVSTTITLQTNRAANNEPGNTKTTISTPIPTASPLPSQSWETGSDSEHTSLYKILAGSVALVLSVLVMLLVVYVTKRYPASLG  
QEQRHQHQHTLQGRRRRPPARKIEGKATRQHDGAILAQEYYVDYKPSNSEAGDLLGNGNAAFMMQSMGNRDCQV
