# Supplementary material for: Origin and Loss of Nested LRRTM/α-Catenin Genes during Vertebrate Evolution
Source: PubMed Central journal article supplement (PMC3933685; doi:10.1371/journal.pone.0089910), 2014-02-24
Supplement: pone.0089910.s009.pdf [file pone.0089910.s009.pdf]

**Table S2.** Accession numbers and assembled amino-acid sequences of  $\alpha$ -catenins.

| Protein  | Refseq                                                               | Ensembl                                                         | Elefant shark genome                     |
|----------|----------------------------------------------------------------------|-----------------------------------------------------------------|------------------------------------------|
| HsCTNNA1 | NP_001894.2                                                          |                                                                 |                                          |
| GgCTNNA1 | XP_414513.1                                                          |                                                                 |                                          |
| XtCTNNA1 |                                                                      | ENSXETP00000018423                                              |                                          |
| LcCTNNA1 | XP_006003759.1                                                       |                                                                 |                                          |
| DrCTNNA1 | NP_571531.1                                                          |                                                                 |                                          |
| LoCTNNA1 |                                                                      | ENSLOCP00000014576                                              |                                          |
|          |                                                                      |                                                                 | AAVX01038267.1                           |
|          |                                                                      |                                                                 | AAVX01215805.1                           |
| CmCTNNA1 |                                                                      |                                                                 | AAVX01270210.1                           |
|          |                                                                      |                                                                 | AAVX01038266.1                           |
|          |                                                                      |                                                                 | AAVX01071410.1                           |
| HsCTNNA2 | NP_004380.2                                                          |                                                                 |                                          |
| GgCTNNA2 | NP_990467.1                                                          |                                                                 |                                          |
| XtCTNNA2 | NP_001090774.1                                                       |                                                                 |                                          |
| LcCTNNA2 | XP_006004641.1<br>XP_005998291.1                                     |                                                                 |                                          |
| DrCTNNA2 | XP_005160129.1                                                       |                                                                 |                                          |
| LoCTNNA2 |                                                                      | ENSLOCG00000002534<br>ENSLOCT00000003019<br>LG4:6180092:6180172 |                                          |
|          |                                                                      |                                                                 | AAVX01050520.1                           |
|          |                                                                      |                                                                 | AAVX01159160.1                           |
| CmCTNNA2 |                                                                      |                                                                 | AAVX01263085.1                           |
|          |                                                                      |                                                                 | AAVX01077370.1                           |
| HsCTNNA3 | XP_005269774.1                                                       |                                                                 |                                          |
| GgCTNNA3 | NP_001186465.1                                                       |                                                                 |                                          |
| LcCTNNA3 | XP_006003252.1<br>XP_006010356.1<br>NW_005819914.1<br>NW_005821299.1 |                                                                 |                                          |
| LoCTNNA3 |                                                                      | ENSLOCP00000014271<br>ENSLOCP00000014285                        |                                          |
|          |                                                                      |                                                                 | AAVX01289477.1                           |
|          |                                                                      |                                                                 | AAVX01235657.1                           |
|          |                                                                      |                                                                 | AAVX01368489.1                           |
| CmCTNNA3 |                                                                      |                                                                 | AAVX01228089.1                           |
|          |                                                                      |                                                                 | AAVX01238450.1                           |
|          |                                                                      |                                                                 | AAVX01238496.1                           |
|          |                                                                      |                                                                 | AAVX01060192.1                           |
| PmCTNNA  |                                                                      |                                                                 | ENSPMAP00000002805<br>ENSPMAP00000002805 |
| BfCTNNA  | XP_002608335.1                                                       |                                                                 |                                          |
| CiCTNNA  | XP_002131748.1                                                       |                                                                 |                                          |
| DmCTNNA  | NP_524219.1                                                          |                                                                 |                                          |

>HsCTNNA1

MTAVHAGNINFKWDPKSLEIRTLAVERLLEPLVTQVTTLVNTNSKGPSNKKRGRSKKAHVLAASVEQATENFLEKGDKIAKESQFLKE  
ELVAAVEDVRKQGDLMKAAAGEFADDPCCSVKRGNMVRAARALLSAVTRLLILADMADVYKLLVQLKVVEDGILKLRNAGNEQDLGIQ  
YKALKPEVDKLNIMAARKQELKDVGHDRDQMAAARGILQKNVPILYTASQAQLQHPDVAAYKANRDLIYKQLQAVTGISNAAQATAS  
DDASQHQGGGGELAYALNNFDKQIIVDPLSFSEERFRPSLEERLESIIISGAALMADSSCTRDRRERIVAECAVNRQALQDLLSEYM  
GNAGRKERSDALNSAIDKMTKKTRDLRRQLRKAVMDHVSDFSLETNVPLLVLEAAKNGNEKEVKEYAQVFRHANKLIEVANLACSI  
SNNEEGVKLVRMSASQLEALCPQVINAALALAAKPSKLAQENMDLFKEQWEKQVRVLTDAVDDITSIDDFLAVSENHILEDVNCVVI  
ALQEKDVDGLDRTAGAIRGRAARVIVHVTSEMDNYEPGVYTEKVLKLLSNTVMPRFTEQVEAAVEALSSDPAQPMDEFIDASR  
LVYDGIRDIRKAVLMIRTPPELDDSDFFETEDFDVRSRTSVQTEDDQLIAGQSARAIMAQLPQEQAIAEQVASFQEEKSKLDAEVSK  
WDDSGNDIIVLAKQCMIMMEMTDFTRGKGPLKNTSDVI SAAKIAEAGSRMDKLGRTIADHCPDSACKQDLLAYLQRIALYCHQLNI

CSKVKAEVQNLGGELVSVGSDSAMS LIQAANKLMNAVVTVKASYVASTKYQKSQGMASLNLPAVSWKMKAPEKKPLVKREKQDETQT  
KIKRASQKXHVNPVQALSEFKAMDSI

>GgCTNNA1

MTAVTAGNVNFRWDPKSLEIRTLAVERLLEPLVTQVTTLVNTSNKGPSNKKRGRSKKAHVLAASVEQATENFLDKGDKIAKESQFLKE  
ELVAAVEDVRKQGDMLKMSASGEFADDPCCSVKRGNMVRAARALLSAVTRLLILADMADVYKLLVQLKVVVEEGLKLRNAGTEQDLGIQ  
YKALKPEVDKLNMAAKRQQLKDVGHDRDQMAAARGILQKNVPILYTASQACLQHPDVAAAYKANRDLIYKQLQAVTGISNAAQATAS  
DDAAQQQGGGELAYALNNDKQIIVDPSTFSEERFRPSLEERLESISGAALMADSSCTRDRRERIVAECNAVRQALQDLLSEYMG  
NAGRKERSDALNSAIDKMTKTRDLRRLRQLRKAVMDHVSDSFLETNVP LLVLEAARNNGNEKEVKEYAQVFRHANKLIEVANLACSI  
SNNEEGVKLV RMSASQLEALCPQVINAALALAAKPKSKLAQENMELFKEQWEKQVRVLTDAVDDITSIDDFLAVSENHILEDVNCVIA  
LQEKDQVGLDRTAGAIRGRAARVHVVTSEMDNYEPGVYTEKVL EATKLLSNTVMPRFTEQVEAAVEALS SDPAQPM DENEFIGASRL  
VYDGI RDIRKAVLMIRTP EELDDSD FETEDFDVRSRTSIQTEDDQLIAGQSARAIMAQLPQE QKAKIAEQVASFQEEKSKLDAEVSKW  
DDSGNDIIVLAKQCMIMMEMTDFTRGKGPLKNTSDVISAAKKIAEAGSRMDKLGRTIADHCPDSACKQDLLAYLQRIALYCHQLNIC  
SKVKAEVQNLGGELVSVGSDSAMS LIQAANKLMNAVVTVKASYVASTKYQKSQGMASLNLPAVSWKMKAPEKKPLVKREKQDETQT  
IKRASQKXHVNPVQALSEFKAMESI

>XtCTNNA1

MTLNTGNINFKWDPKSLEIRTLAVERLLEPLVTQVTTLVNNSNKGPSNKKKGRSKKAHVLAASVEQATQNFLEKGDKIAKESQFLKEE  
LIAAVEDVRKQGEQMRMSASGEFADDPCCSVKRGNMVRAARALLSAVTRLLILADMADVYRLLVQLKVVVEEGLKLRNAGTEQDLGIQY  
KALKAEVDKLVNMTAKRQQLKDIGHRDQMAAARGILQKSIPILYTASQACLQHPDVAAAFKANRDLIYKQLQAVTGISNAAQATSS  
ETAHQGGGELAVLNNFDKQIIVDPLGFSEERFRPSLEERLESISGAALMADSSCTRDRRERIVAECNSVRQALQDLLSEYMGNT  
GRKERSDALNSAIDKMTKTRDLRRLRQLRKAVMDHVSDSFLETNVP LLVLEAARNNGNEKEVKEYAQVFRHANKLIEVANLACSI  
SNNEEGVKLV RMSASQLEALCPQVINAALALAAKPKSKMAQETMDLFKEQWERQVRVLTDAVDDITSIDDFLAVSENHILEDVNCVIALQ  
EKDQVGLDRTAGAIRGRAARVHVVTSEMDNYEPGVYTEKVL EATKLLSNTGIKRIEMLCNTPEELDDSD FETEDFDVRSRTSVQTED  
DQLIAGQSARAIMAQLPQE QKAKIAEQVASFQEEKSKLDAEVSKWDDNGNDIIVLAKQCMIMMEMTDFTRGKGPLKNTSDVISAAK  
IAEAGSRMDKLGRTIADHCPDSACKQDLLAYLQRIALYCHQLNICSKVKAEVQNLGGELVSVGSDSAMS LIQAANKLMNAVVTVKAS  
YVASTKYQKSQGMASLNLPAVSWKMKAPEKKPLVKREKQDETQT KIKRASQKXHVNPVQALSEFKAMESI

>LcCTNNA1

MTNVHTPNVNFKWDPRNLEIRTLAVERLLEPLVTQVTTLVNNSNKGPSNKKKGRSKKAHVLAASVEQATQNFLEKGDKIAKETQFLKE  
ELTAAVEDVRKQGETMKGASGEFADDPCCSVKRGNMVRAARALLSAVTRLLILADMADVYKLLIQLKVVEDNLLKVRNAGTEQELGIQ  
YKALKPEVDKLIAMAAKQQLKDIHRDQMAAARGV LQKNIPILY TASQACLQHPDVAAAYKANRDLIYKQLQAVTGISNAAQATAS  
DDLTVNSQQSGGGGELASALNNDNQIIVDPLNFSEERFRPSLEERLESISGAALMADSSCTRDRRERIVAECNAVRQALQDLLSE  
YMGNAGRKERSDALNSAIDKMTKTRDLRRLRQLRKAVMDHVSDSFLETNVP LLVLEAARNNGNEKEVKEYAQVFRHANKLIEVANLAC  
SISINNEGVKLV RMSASQLEALCPQVINAALALAAKPKSKVAQENMDLYKQWERQVRVLTDAVDDITSIDDFLAVSENHILEDVNCV  
VIALQEKDQVGLDRTAGAIRGRAARVHVVTSEMDNYEPGVYTEKVL EATKLLSNTVMPRFTEQVEAAVEVLSTNPSQPVDENEFIGA  
SRLVYDGVDRIRKAVLMIRTP EELDDSD FETEDFDVRSRTSVQTEDDQLIAGQSARAIMAQLPQE QKAKIAEQVAF EEEKIKLDAEV  
SKWDDSGNDIIVLAKQCMIMMEMTDFTRGKGPLKNTSDVISAAKKIAEAGSRMDKLGRTIADHCPDSACKQDLLAYLQRIALYCHQL  
NICSKVKAEVQNLGGELVSVGSDSAMS LIQAANKLMNAVVTVKASYVASTKYQKSQGMASLNLPAVSWKMKAPEKKPLVKREKQDEA  
QTIKRSQKXHVNPVQALSEFKAMDSI

>DrCTNNA1

MTSINTANINFKWDPKSLEIRTLAVERLLEPLVTQVTTLVNNSNKGPSNKKKGRSKKAHVLAASVEATQNFLEKGEKIAKESQFLKE  
ELTAAVEDVRKQGESMKMASGEFAEDDPCCSVKRGNMVRAARALLSAVTHLLVLADMADVQ LLLQLKLV EENLMKVRNAGTEQELGIQ  
YKALKPEVDKLNMAAKRQQLKDVH HKDQMAAARGV LQRNVPMLY TASA RACLQHPDVAAAYKANRDLIYKQLQHAVSGISNAAQATSS  
EDSSFQTAGGGELAYALNNDKQIIVDPLSFSEERFRPSLEERLESISGAALMADSSCTRDRRERIVAECNSVRQALQDLLSEYM  
GNAGRKERSDALNSAIDRMTKTRDLRRLRQLRKAVMDHVSDSFLETNVP LLVLEAARNNGNEKEVKEYAQVFRHANKLIEVANLACSI  
SNNEEGVKLV RMSASQLEALCPQVINAALALAAKPKSKVAQDNMDLFKQWERQVRVLTDAVDDITSIDDFLAVSENHILEDVNCV  
ALQEKDQVGLDRTAGAIRGRAARVHVVTSEMDNYEPGVYTEKVL EATKLLTETVMPRFTEQVEAAVEALSANQPVDENEFIGASR  
LVYDGVDRIRKAVLMIRTP EELDDSD FETEDFDRSRTSVQTEDDQLIAGQSARAIMAQLPQE QKAKIAEQVASFQEEKSKLDAEVSK  
WDDSGNDIIVLAKQCMIMMEMTDFTRGKGPLKNTSDVISAAKKIAEAGSRMDKLGRTIADHCPDSACKQDLLAYLQRIALFCHQLNI  
CSKVKAEVQNLGGELVSVGLSDSAMS LIQAANKLMNAVVTVKASYVASTKYQKSQGMASLNLPAVSWKMKAPEKKPLVKREKLDGQT  
NKVKRSSQKXHVNPVQALSEFKAMDSI

>LoCTNNA1

MTSINTANINFKWDPKSLEIRTLAVERLLEPLVTQVTTLVNNSNKGPSNKKKGRSKKAHVLAASVETATQNFLEKGDKIARESQFLKE  
ELTAAVEDVRKQGESMKTASGEFADDPCCSVKRGNMVRAARALLSAVTHLLVLADMADVYKLLVQLKLV EENLVKVRNAGTEQELGIQ  
YKALKPEVDKLNMAAKRQQLKDVH HKDQMAAARGV LQRNIPMLY TASA RACLQHPDVAAAYKANRDLIYKQLQAVSGISNAAQATAS  
EDSALSQPGGGGELAYALNNDKQIIVDPVNFSEERFRPSLEERLESISGAALMADSSCTRDRRERIVAECNSVRQALQDLLSEYM  
GNAGRKERSDALNSAIDRMTKTRDLRRLRQLRKAVMDHVSDSFLETNVP LLVLEAARNNGNEKEVKEYAQVFRHANKLIEVANLACSI  
SNNEEGVKLV RMSASQLEALCPQVINAALALAAKPKSKVAQDNMDLFKQWERQVRVLTDAVDDITSIDDFLAVSENHILEDVNCV  
ALQEKDQVGLDRTAGAIRGRAARVHVVTSEMDNYEPGVYTEKVL EATKLLTDTVMPRFSEQVEAAVEALSANPAQVDENEFIGASR  
LVYDGVDRIRKAVLMIRTP EELDDSD FETEDFDVRSRTSVQTEDDQLIAGQSARAIMAQLPQE QKAKIAEQVASFQEEKSKLDAEVSK  
WDDSGNDIIVLAKQCMIMMEMTDFTRGKGPLKNTSDVISAAKKIAEAGSRMDKLGRTIADHCPDSACKQDLLAYLQRIALYCHQLNI  
CSKVKAEVQNLGGELVSVGLSDSAMS LIQAANKLMNAVVTVKASYVASTKYQKSQGMASLNLPAISWKMKAPEKKPLVKREKQDDGQT  
NKVKRSSQKXHVNPVQALSEFKAMDSI

>CmCTNNA1

NINFKWDPKNLELRTL AVERLLEPXXXXXXXXXXXXXXXXXKGPSKGGKGRSKKAHVLAASVEQATQNFLEKGEQIAKESQDLKDELLA  
VDVRKQGESMRSSASEFADDPCCSMKRGNMVRAARALLSAVTRLLILADMADVYKLLVQLKVVVEETLVKVRNANNEQELGIHYKALKPE  
VDKLNMAAKRQQLKDIHRDQMAAARGV LQKNIPMLY TASA RACLQHPDVAAAYKANRDLIYKQLTQAVTGISNAAQATASEDAHLGQ  
QSSAGELADALNRFDKQIIVDPLSFSEERFRPSLEERLESISGAALMADSSCTRDRRERIVAECNAVRQALQDLLSEYMGNAGRKE  
RGDALNAAIDKMTKTRDLRRLRQLRKAVMDHVSDSFLETNVP LLVLEAARNNGNEKEVKEYAQVFRDHASKLVEVANLACSI  
SNNEEVX  
KLV RMSASQLES LCPQVINAALALAAKPKSKVAQDNMDLFKELWEKQVRVLTDAVDDITSIDDFLAVSENHILEDVNCVIALQEKD  
VDGLDRTAGAIRGRAARVHVVTSEMDNYEPGVYTEKVL EATKLLSETVMPRFSEQVEAAVEALSANPAQVDENEFIGASRLVYDGI  
RDIRKAVLMIRTP EELDDSD FQEDYDVR SRTSVQTEDDQLIAGQSARAIMAQLPQE QKAKIAEQVASF EEEKIKLDAEVSKWDDSG  
NDIIVLAKQCMIMMEMTDFTRGKGPLKNTSDVISAAKKIAEAGSRMDKLGRTIADHCPDSACKQDLLAYLQRIALYCHQLNICSKV

KAEVQNLGGELIVSGVDSAMSLIQAAKNLMNAVVTVKASYVASTKYQRSQGMALNMPAVSWKMRAPKPKPLVKREKNDETHKVKRA  
SQKKHVSQALSEFKAMDSI

>HsCTNNA2

MTSATSPIILKWDPKSLEIRTLTVERLLEPLVTQVTTLVNTSNKGPSGKKKGRSKKAHVLAASVEQATQNFLEKGEQIAKESQDLKEE  
LVAAVEDVRKQGETMRIASSEFADDPCCSVKRGTMVRAARALLSAVTRLLILADMADVMRLLSHLKIVEEALAVKNATNEQDLANRF  
KEFGKEMVKLNVAARRQQLKDPHCRDEMAAARGALKKNATMLYTASQAFLRHPDVAATRANRDYVFKQVQEAIAIGISNAQAATSPT  
DEAKGHTGIGELAAALNEFDNKIILDPMTFSEARFRPSLEERLESIISGAALMADSSCTRDRRERIVAECNAVRQALQDLLSEYMNN  
TGRKEKGDPLNIAIDKMTKTRDLRRLRQLRKAVMDHISDSFLETNVP LLVLEAAKSGNEKEVKEYAQVVFREHANKLVEVANLACSI  
NEEGVKLVRMAATQIDSLCPQVINAALTLAARPQSKVAQDNMDVFKDQWEKQVRVLEAVDDITSVDDFLSVSENHILEDVNKCVIAL  
QEGVDVTLDRTAGAIRGRAARVIHIINAEMENYEAGVYTEKVLLEATKLLSETVMPRFAEQVEVAIEALSANVPQPFENEFDASRLV  
YDGVDRIRKAVLMIRTPPELEDDSDFEQEDYDVRSTRSVQTEDDQLIAGQSARAIMAQLPQEEKAKIAEQVEIFHQEKSKLDAEVAKW  
DDSGNDIIVLAKQCMIMMEMTDFTRGKGPLKNTSDVINAAKIAEAGSRMDKRLARAVADQCPDSACKQDLLAYLQRIALYCHQLNIC  
SKVKAEVQNLGGELIVSGLDSATSLIQAAKNLMNAVVLTVKASYVASTKYQKVYGTAAVNSPVVSWKMKAPKPKPLVKREKPEEFQTR  
VRRGSQKKHISPVQALSEFKAMDSF

>GgCTNNA2

MTSATSPIILKWDPKSLEIRTLTVERLLEPLVTQVTTLVNTSNKGPSGKKKGRSKKAHVLAASVEQATQNFLEKGEQIAKESQDLKEE  
LVAAVEDVRKQGETMRIASSEFADDPCCSVKRGTMVRAARALLSAVTRLLILADMADVMRLLSHLKIVEEALAVKNATNEQDLANRF  
KEFGKEMVKLNVAARRQQLKDPHCRDEMAAARGALKKNATMLYTASQAFLRHPDVAATRANRDYVFKQVQEAIAIGISNAQAATSPT  
DENKHTGIGELAAALNEFDNKIILDPMTFSEARFRPSLEERLESIISGAALMADSSCTRDRRERIVAECNAVRQALQDLLSEYMNN  
NTGRKEKGDPLNIAIDKMTKTRDLRRLRQLRKAVMDHISDSFLETNVP LLVLEAAKSGNEKEVKEYAQVVFREHANKLVEVANLACSI  
NNEEGVKLVRMAATQIDSLCPQVINAALTLAARPQSKVAQDNMDVFKDQWEKQVRVLEAVDDITSVDDFLSVSENHILEDVNKCVIA  
LQEGVDVTLDRTAGAIRGRAARVIHIINAEMENYEAGVYTEKVLLEATKLLSETVMPRFAEQVEVAIEALSANVPQPFENEFDASRLV  
YDGVDRIRKAVLMIRTPPELEDDSDFEQEDYDVRSTRSVQTEDDQLIAGQSARAIMAQLPQEEKAKIAEQVEIFHQEKSKLDAEVAKW  
WDDSGNDIIVLAKQCMIMMEMTDFTRGKGPLKNTSDVINAAKIAEAGSRMDKRLARAVADQCPDSACKQDLLAYLQRIALYCHQLNIC  
CSKVAEVQNLGGELIVSGLDSATSLIQAAKNLMNAVVLTVKASYVASTKYQKVYGTAAVNSPVVSWKMKAPKPKPLVKREKPEEYQTR  
VRRGSQKKHISPVQALSEFKAMDSF

>XtCTNNA2

MSSATSPIILKWDPKSLEIRTLTVESSLLEPLVTQVTTLVNTSNKGPSGKKKGRSKKAHVLAASVEQATQNFLEKGEQIAKESQDLKEE  
LISAVEDVRKQGETMTRITSEFADDPCCSVKRGTMVRAARALLSAVTRLLILADMADVMRLLIHLKIVEEALAVKNATNEQDLAHRF  
KEFGKEMVKLNVAARRQQLKDPHCRDEMAAARGALKKNATMLYTASQAFLRHPDVAATRANRDYVFKQVQEAIAIGIANAQAATSPT  
DEKQHTGIGELAAALNEFDNKIILDPMTFSEARFRPSLEEKLESIISGAALMADSSCTRDRRERIVAECNSVRQALQDLLSEYMNN  
CRYGTWDESCKSGRKEKGDPLNIAIDKMTKTRDLRRLRQLRKAVMDHISDSFLETNVP LLVLEAAKNGNEKEVKEYAQVVFREHANKL  
VEVANLACSI SNNEEGVKLVRMAATQIDSLCPQVINAALTLAARPQSKVAQDNMDVFKDQWEKQVRVLEAVDDITSVDDFLSVSENH  
ILEDVNKCVIALQEGVDVTLDRTAGAIRGRAARVIHIINAEMENYEAGVYTEKVLLEATKLLCETVMPRFAEQVEVAIEALSANIPQPF  
EENEFDASRLVYDGVDRIRKAVLMIRTPPELEDDSDFEQEDYDVRSTRSVQTEDDQLIAGQSARAIMAQLPQEEKAKIAEQVEIFHQ  
EKSKLDAEVAKWDDSGNDIIVLAKQCMIMMEMTDFTRGKGPLKNTSDVINAAKIAEAGSRMDKRLARAVADQCPDSACKQDLLAYLQ  
RIALYCHQLNICSKVKAEVQNLGGELIVSGTAVQSTFTTFYEVAGDVIAGGRDSQLSLDLLPSCTEGSLFSGSRDSTMLDSATSLIQ  
AAKNLMNAVVLTVKASYVASTKYQKVYGTAAVNSPVVSWKMKAPKPKPLVKREKPEEYQTRVRRGSQKKHISPVQALSEFKAMDSF

>LcCTNNA2

MTSATSPIILKWDPKSLEIRTLTVERLLEPLVTQVTTLVNTSNKGPSKSKKGRSKKAHVLAASVEQATQNFLEKGEQIAKESLDDLKEE  
LVVAVEDVRKQGETMKVASSEFADDPCCSVKRGTMVRAARALLSAVTRLLILADMADVMRLLAHLKIVEEALAVKNATNEQDLANRF  
KEFGKEMVKLNVAARRQQLKDPHCRDEMAAARGALKKNATMLYTASQAFLRHPDVAATRANRDYVFKQVQEAIAIGISNAQAATSPT  
DDKHGHTGIGELAAALNEFDNKIILDPMTFSEARFRPSLEERLESIISGAALMADSSCTRDRRERIVAECNSVRQALQDLLSEYMNN  
TGRKEKGDPLNSAIDKMTKTRDLRRLRQLRKAVMDHISDSFLETNVP LLVLEAAKSGNEKEVKEYAQVVFREHANKLVEVANLACSI  
NEEGVKLVRMAATQIDSLCPQVINAALTLAARPQSKVAQDNMDVFKDQWEKQVRVLEAVDDITSVDDFLSVSENHILEDVNKCVIAL  
QEGVDVTLDRTAGAIRGRAARVIHIINAEMENYEAGVYTEKVLLEATKLLSETVMPRFAEQVEVAIEALSANVPQPFENEFDASRLV  
YDGVDRIRKAVLMIRTPPELEDDSDFEQEDYDVRSTRSVQTEDDQLIAGQSARAIMAQLPQEEKAKIAEQVESFRQEKCKLDAEVAKW  
DDSGNDIIVLAKQCMIMMEMTDFTRGKGPLKNTSDVINAAKIAEAGSRMDKRLARAVADQCPDSACKQDLLAYLQRIALYCHQLNIC  
SKVKAEVQNLGGELIVSGLDSATSLIQAAKNLMNAVVLTVKASYVASTKYQKVYGTAAVNSPVVSWKMKAPKPKPLVKREKPEEYQTR  
VRRGSQKKHISPVQALSEFKAMDSF

>DrCTNNA2

MTSATSPIILKWDPKSLEIRTLTVERLLEPLVTQVTTLVNTSNKGPSKSKKGRSKKAHVLAASVEQATQNFLEKGEQIAKESQDLKEE  
LIAAVEDVRKQGETMRVASSEFADDPCCSVKRGTMVRAARALLSAVTRLLILADMADVMRLLAHLKIVEEALAVKNATNEQDLANRF  
KEFGKEMVKLNVAARRQQLKDPHCRDEMAAARGALKKNATMLYTASQAFLRHPDVAATRANRDYVFKQVQEAIAIGISSAQAATSPT  
DEKHGHTGIGELAAALNEFDNKIILDPMTFSEARFRPSLEERLESIISGAALMADSSCTRDRRERIVAECNAVRQALQDLLSEYMNN  
TGRKEKGDPLNSAIDKMTKTRDLRRLRQLRKAVMDHISDSFLETNVP LLVLEAAKSGNEKEVKEYAQVVFREHANKLVEVANLACSI  
NEEGVKLVRMAATQIDSLCPQVINAALTLAARPQSKVAQDNMDVFKDQWEKQVRVLEAVDDITSVDDFLSVSENHILEDVNKCVIAL  
QEGVDVTLDRTAGAIRGRAARVVIHIINAEMENYEPGVYTERVLESIKLLSETVMPRFAEQVEVAIEALSTSPQPFENEFDASRLV  
YDGVDRIRKAVLMIRTPPELEDDSDFEQEDYDARSRTSIQTEDDQLIAGQSARAIMAQLPQEEKAKIAEQVESFRQEKCKLDAEVAKW  
DDNGNDIIVLAKQCMIMMEMTDFTRGKGPLKNSDVINAAKIAEAGSRMDKRLARAVADQCPDSACKQDLLAYLQRIALYCHQLNIC  
SKVKAEVQNLGGELIVSGLDSATSLIQAAKNLMNAVVLTVKASYVASTKYQKVYGTAAVNSPVVSWKMKAPKPKPLVKREKPEEQTR  
VRRGSQKKHISPVQALSEFKAMDSF

>LoCTNNA2

MTTATSPIILKWDPKSLEIRTLTVERLLEPLVTQVTTLVNTSNKGPSKSKKGRSKKAHVLAASVEQATQNFLEKGEQIAKESQDLKEE  
LIAAVEDVRKQGETMRVASSEFADDPCCSVKRGTMVRAARALLSAVTRLLILADMADVMRLLAHLKIVEEALAVKNATNEQDLANRF  
KEFGKEMVKLNVAARRQQLKDPHCRDEMAAARGALKKNATMLYTASQAFLRHPDVAATRANRDYVFKQVQEAIAIGISSAQAATSPT  
DEKHGHTGIGELAAALNEFDNKIILDPMTFSEARFRPSLEERLESIISGAALMADSSCTRDRRERIVAECNAVRQALQDLLSEYMNN  
TGRKEKGDPLNTAIDKMTKTRDLRRLRQLRKAVMDHISDSFLETNVP LLVLEAAKSGNEKEVKEYAQVVFREHANKLVEVANLACSI  
NEEGVKLVRMAATQIDSLCPQVINAALTLAARPQSKVAQDNMDVFKDQWEKQVRVLEAVDDITSVDDFLSVSENHILEDVNKCVIAL  
QEGVDVTLDRTAGAIRGRAARVVIHIINAEMENYEPGVYTERVLESIKLLSETVMPRFAEQVEVAIEALSTNPPQPFENEFDASRLV  
YDGVDRIRKAVLMIRTPPELEDDSDFEQEDYDARSRTSVQTEDDQLIAGQSARAIMAQLPQEEKAKIAEQVESFRQEKCKLDAEVAKW

DDNGNDIIVLAKQCMIMMEMTDFTRGKGPLKNSSDVINAAKIAEAGSRMDKLARAVADQCPDSACKQDLLAYLQRIALYCHQLNIC  
SKVKAEVQNLGGELIVSGLDSATSLIQAANKLMNAVVLTVKASYVASTKYQKVYGTAAVNSPVVSWRMKAPEKKPLVKREKPEECQTR  
VRRGSQKKHISPVQALSEFKAMDSF

>CmCTNNA2

MTAATSPIILLKWDPKSLEIRTVTVERLLEPLVTVQVTTLVNTSSKGPSGKGGKRSKKAHVLAASVEQATQNFLEKGEQIAKESQDLKDE  
LLAAVDDVRKQGETMRIASGDFADDDPCSSVKRGTMVRAARALLSAVTRLLI LADMADVMRLLTHLKI VEEESLDAVKNATNEQDLANRF  
KEFGKEMVKNLYVAARRQQLKDLHCRDEMAAARGALKKNATMLYASQAF LRHPDVAATRANRDYVFKQVQEA IAGISNAAQSTSP  
DDKHGHPGIGELAAALNEFDNKI I LDPMHFSEQRYP SLEERLES I I SGAALMADSSCTRD RRER I I VAECNAVRQALQDLLTEYMNN  
LRKAVMDHISDSFLETNVPLLVLEAAKSGNEKEVKEYAQV FREHANKLVEVANLACSI SNNEGVKLVMAATQIDSLCPQENHILE  
DVNKCVI ALQEGDVTLDRTAGAIRGRAARVIHI I SAEMENYEPGVYTEKVMESTKLLSETGTPEELEDSDFEQEDYDVRSRTSVQT  
EDDQLIAGQSARRGKPLKNTSDVINAAKIAEAGSRMDKLARAVADQCPDSSCKQDLLAYLQRIALYCHQLNICSKVKAEVQNLGGE  
LIVSG

>HsCTNNA3

MSAETPITLNDPQDLQVQFTTVEKLEPLI IQVTTLVNCPQNPSSRKKGRSKRASVLLASVEEATWNLDDKGEKIAQEATVLKDEL  
ASLEEVKRESEALKVSAERFTDDPCFLPKREAVVQAARALLAAVTRLLI LADMIDVMCLLQHVSAFQRTFESLKNVANKSDLQKTYQ  
LGKLEENLDYLAFKRQDLKSPNQDEIAGARASLKENSPLLHSCSACLEHSDVASLKASKDVTCEEIQNALNVI SNASQGIQNM  
TPEPQAATLQSGALDELENIIVLNPLTVTEEIRP SLEKREAI I I SGAALLADSSCTRD LHRERI I I AECNAIRQALQDLLSEYM  
NNAK KERSNTLNIALDNMCKKTRDLRRQLRKA I IDHVSDSFLDTTVPLLVLEAAKNGREKEIKEYAAIFHEHTSRLVEVANLAC  
SMSTNED GIKIVKIAANHLETCPQI INAALALAAARPKSQAVKNTMEMYKRWENHIVL TEAVDDITSIDDFLAVSESHILEDV  
NKCI IALRDQ DADNLDRAAGAIRGRAARVAHIVTGEMDSYEPGAYTEGVMRNVNFLTSTVIPEFVTQVNVVALEALS  
KSSNLVLDNDDNQFVDISKIYDT IHDIRCSVMMIRTP EELEDVSDLEEEHEVRSHTSIQTEGKTDRAKMTQLP  
EAEKEKIAEQVADFKKVKSKLDAEIEI WDDTSDNDIIVL AKNMCMIMMEMTDFTRGKGPLKHTTDVIYAAKMI  
SESGSRMDVLRQIANQCPDPSCKQDLLAYLEQIKLYSHQLKICSQVKAIEIQLGGELIMSALDSVTS  
LIQAANKLMNAVVTVMKSYIASTKIRIQSPAGPRHPVVMWRMKAPAKKPLIKREKPEETCAAVRRGS  
AKKKI HPLQVMSEFRGRQIY

>GgCTNNA3

MSTKVPNIKLIKIDPQDLQVQFTTVEKLEPLI IQVTTLVKCPQNPSSGKGGKRSKRARILLASVEEATQNLDDKGEKIAKEAVVLKEEL  
HAALADVQKESQALKISAEAF TGDP CYLPKRQAVVQTARSLTAVTRLLI LADMVDVAYLLEHLTIVQRTFETLRNVSSK  
SDLQNTYQ KFQKDLLENLDYLAYKRQDLKSSDQRDEIAAARATLKENSLLHVSACSACLEHSDVASL  
TASKDSICSEIQNALNVI SNASQGVGNKK GQPASYRATLGSALDELEHIIQDPLV  
VSEEKIRPSLEKREAI I I SGAALLADSSCTRD FHRERI I I AECNAIRQALQDLLSEYINNTD  
RKERSDALNTAIDSMCKKTRDLRRQLRKA I IDHISDSFLDTTVP  
LLVLEAAKNGREKEIKEYAAIFREHTGRLVEVANLACSLSTNE DGMIQVMAANHLETCPQV  
INAALALASARPKSQVVKSNMEMYRSIWENHVHVLTEAVDDITSIDDFLAVSESHILEDV  
NKCI IALRE QNADNLDRAAGAIRGRAARVAHIVSGEMDNYEPGAYTEGVMKNVQYLTKSVIPEFI  
SQVNI ALESLSKNTVMHFDDNQFVDVSKKVVYD TIHTIRCSVMMIRTP EELEDVSDLEEDH  
DTRSRTSIQTEGKTDRAKMTQLP EAEKEKIAEQVADFKKVKSKLDAEIEI WDDTSDNDIIVL  
AKRMCMIMMEMTDFTRGRGPLKNTSDVINAAKMISESGSRMDVLRQIANQCPDPSCKQDLLAYLEQIKLYSHQLKICSQV  
RAEIQNLGGELIMSALDSVTSLIQAANKLMNAVVTVMKSYIASTKIRIQSPTGPRHPVVMWRMKAPAKKPLIKREKPEE  
IYAAVRKGSAKKKIHPVQVMSEFRGREIV

>LcCTNNA3

MTSTLPKIQKINPQDLQVQFTTVEKLEPLI IQVTTLVNCPKPNPKKGGKCSKRARILLASVEEATWNLDDKGEKIAKDSKILKEEL  
TAAVEDVRKRESEILRLTAKDFTDDPCCLPKREAVVQAARALLAAVTRLLI LADI IDVVYLLQHLTIVQKTFESLRNVSS  
RAELKKAYE KFGKDLEALDHLAYKRQDLKSIDQRDEIAGARASLKQNSTLLYSISTACLEHPDVASLKASKDSVCNGIQ  
NALSVIDSASQGIGHEK TQLPLSSGTLGGALDEFQNWII LDPLTINEEKIRPTLEKRL  
EGI I SGAALLADSSCTRD LHRERI I I RECNAIRQALQDLLSEYM  
NNAK MKERTNAVND AIDNMCKRTRELKQLRKA I IDHVSDSFLDTTVPLLVLEAAKNGREKEIKEYAAIFREHANKLVEVANLAC  
SISTNT DGIKIQVMAANHVETLCPQVINAALALAAARPKSQVVKNNMEMYKKAWEHIRLLTEAVDDITRIDDFLAVSESHILEDV  
NKCI IALRE RDLDSLDRAGAIRGRAARVAHIVTGEMDNYESGVTGVMKNVQYLKEIAIPEFVSQVNI AIEV  
LSTDTMNFDDNQFVDVSKKVVYD AIHDIRCSVLMIRTP EELEDVSDFEEDHETHSHTSGHTEGKTDRAKMTQLP  
DAEKAKIAEQVADFKKVKSKLDAEIEI WDDTSDNDIIVL LAKMCMIMMEMTDFTRGKGPLKNTSDVINAAKMI  
SEAGSRMDKLARQIANLCPDPSCKQDLLAYLEQIKLYSHQLKICSQVKAIEIQNLGGELIMSALDSVTS  
LIQAANKLMNAVVTVMKSYIASSKIRIHTTGPRHPVVMWRMKAPAKKPLIKREKPEEYAAVRKGS  
AKKKIHPVKAMSEFRGREVN

>LoCTNNA3

MTLLQNLQKIDPKDLQIRITVVERLLEPLI IQVTTLVNCPKPNPKKGGKCSKRARILLASVEEATWNLDDKGEKIAKDSKILKEEL  
TAAVEDVRKRESEILRLTAKDFTDDPCCLPKREAVVQAARALLAAVTRLLI LADI IDVVYLLQHLTIVQKTFESLRNVSS  
RAELKKAYE KFGKDLEALDHLAYKRQDLKSIDQRDEIAGARASLKQNSTLLYSISTACLEHPDVASLKASKDSVCNGIQ  
NALSVIDSASQGIGHEK TQLPLSSGTLGGALDEFQNWII LDPLTINEEKIRPTLEKRL  
EGI I SGAALLADSSCTRD LHRERI I I RECNAIRQALQDLLSEYM  
NNAK MKERTNAVND AIDNMCKRTRELKQLRKA I IDHVSDSFLDTTVPLLVLEAAKNGREKEIKEYAAIFREHANKLVEVANLAC  
SISTNT DGIKIQVMAANHVETLCPQVINAALALAAARPKSQVVKNNMEMYKKAWEHIRLLTEAVDDITRIDDFLAVSESHILEDV  
NKCI IALRE RDLDSLDRAGAIRGRAARVAHIVTGEMDNYESGVTGVMKNVQYLKEIAIPEFVSQVNI AIEV  
LSTDTMNFDDNQFVDVSKKVVYD AIHDIRCSVLMIRTP EELEDVSDFEEDHETHSHTSGHTEGKTDRAKMTQLP  
DAEKAKIAEQVADFKKVKSKLDAEIEI WDDTSDNDIIVL LAKMCMIMMEMTDFTRGKGPLKNTSDVINAAKMI  
SEAGSRMDKLARQIANLCPDPSCKQDLLAYLEQIKLYSHQLKICSQVKAIEIQNLGGELIMSALDSVTS  
LIQAANKLMNAVVTVMKSYIASSKIRIHTTGPRHPVVMWRMKAPAKKPLIKREKPEEYAAVRKGS  
AKKKIHPVKAMSEFRGRQVQ

>CmCTNNA3

GHKESHVNA AIDNMCKKTRVLRQLRKA I IDHVSDSFLDTTVPLLVLEAARS GKEKDIQEYGTIFREHTNKLIEVANLAC  
SMSTNE EGKIQVQIATNRIETMCPQVINAALALAAAMPKSTIKTNMEIYKKAWEHIVQLLIEAVDDITCIDDFLAI  
SESHILEDV NKCI IALRE RDVDTLDRAGAIRGRAARVSHVATAEMENYEPGVYTEGVMKSVQILAE  
SAMPEFIAQVNI ALEALSIDS PHQFDDNAFVDAAKKVVYD SVHDVRSVAVLMIRTP EELEDVSDFEEDH  
IRSRTSVQTEGKTDRAKMTPEEKAKIAEQVADFKKVKSKLDAEIEI WDDTSDNDIIVL LAKMCMIMMEMTDFTRGK  
GPLKHTSDVINAAKMISEAGSRMDKLARQIANQCPDPSCKHDLAYLEQIKLYSHQLKICSQVKAIEIQS  
LGELIMSALDSITSLIHAANKLMNAVVTVMKSYIASTKIRIQSPSGVHHSVVMWRMKAPAKKPLIKREKPEE  
MSAAVRKGSAKKKIHPVKAMSEFRGRNV

>PmCTNNA

MSSITSPNIQFKWDPKLEIRTLSVEKTLEPLVQVTTLVNINSKGPSNKKKGRSKKAHVLSASVEKATQNFIDKGDQIARESEYLDK  
ELMDAVDQVTRQGETMRSAAQEFADDPCCSMKRGAMVRAARALLTAVTRLLIADMDVHMLLRHRLRIVEETLEKVRMAGSQQELANT  
FKKFGQEMVTLNHLAARRQQLDKPRLRDEMAAAARGSLKKNATMLYASQAFLNHPDVAATKANRDYVYKQVQEAIASISNAAQATSV  
PSRTQAADNVGELAAALNDFDTKIVLDPNTYNEARMRPSLEERLESISGAALMADSSCTRRDRRERIVAECNSVRQALQDLLTEYMN  
NAGRKEPTDVLNVAIDRMCQKTRDLRRQLRKAVMDHISDSFLETTVPLLVLEAAKKGNEKEVKEYAQVVFREHANKLVEVANLACSL  
SNEEGVKLVMAAQIETLCPQVINAALTLAAKPNKIAQDNMDFVKETWENQVRLLEAVDDITSIDDFLAVSENHILEDVNVKCVMA  
LQEGVDALDRTAGAIRGRAARVVHVNGEMENYEPGIYTEKVLSTMLADSVMPRFAEQVENAIDALSNSPSPVDENEFDASRL  
VYDGRDIRKAVLMIRTPDELDDSDMEDETEVRSYTSVKTENDQIEEGSARALMAQLPQEEKAKIAEQVERFQEEKSKLDAEVAKWDD  
SGNDIIVLSKQCMIMMEMTDFTRGKGPLKNTSNVINAAKIIDLGSKMDKLARVIADQCPDSASKQDQLLAYLQRIALYCHQLNICSK  
VKAEVQNISGEVVVSGLDSATSLIQAAKNLMNAVVLTVKASYVASSKFHKVQHTNINSPVVSWMKKAPEKKPLVKKRERGDDVSSHVR  
GSQKHIISPVQALSEFKGRETY

>BfCTNNA

MASPGGTLKWDPKNLEIKTHSVEKTLEPLVTQVTTLVNTKGNKSGKKKGRSKKAHVLSALVKKATETFIDKGEIIAKDYDPIQDDMMAA  
IDDCCKTGDTMYAASQEFADDPCCSMKRGAMVRAARALLTAVTRLLIADMDVHMLLRHRLRIVEESLERVQAAQDQALNNAFRQY  
KDVVGLNDIAMKQNDLIDPARRDEMAAARNTLKKNSMMLYTASKAFLRHPDVAANKANRDYVYKQVCDVNSLNTAQASGPADPH  
YEGAGELAAALDEFDQKIVMDPASVNEVTRPSLEERLESISGAALMADSSCTRRDRRERIVAECNAVRQALQDLLTEYMN  
CAGGRKTKELDEAVDRMHKTRDLRRQLRKAVVDHVSDFLETNVPPLLVLEAAKKGNEKEVKEYAQVVFREHANKLVEVANLACSM  
SNEEGVKLVRLAANQIENLCPQVINAALTLAARPRSKVAQENMDVFRDQWETQVRLLEAVDDITSIDDFLAVSEQHILEDVNVK  
CLLARQENDADTFDRTAGAIRGRVSRVCNVVNAEMDNYEPGIYTERVREAVVLDGQVMPAFTECVEIVVDALSQDPPKETDENEL  
IDSSRNVEYEGVRDVRRAVLMIRSPPELETDTEYEDETYETHSRSSRMTDDRELEGSQAGEFGKKSARALMRELPEEKKKIAHQ  
LEVFRAEKSKLDEEIAKWDDSGNDIIVLAKQCMIMMEMTDFTRGHGPKLSTMDVINAAKRIAEAGTKMDKLARAIADQCPESQ  
TKDQLLAYLQRIALFCHQLNISKVKAEVQNISGELIVSGPHWASMLDSATSLITASKNLMNAVVLTVKSCYVASTKYKAMK  
NHNVNSPVVWLMKKAPEKKPLVRRREKPEELSAKVRKGSQKRHFSPIQALSEFSSRDTF

>CiCTNNA

MSSVASSNSGQKWNPKNLEIRTLSVEKTLEPLVVQVTTLVNKNKGPSNKKKGRSKRKPVLVADVEKATSLFIEHGLEIARDN  
PELKAEL EEAVEDTRRDGEVMSKTSFAFADDPCCSMKRGSMVRAARALLSSVTRLLIADMDIYNLLRQLKIARKSVGLVKDS  
NPNDDLKKNFKAFGTDLARLNHATMLRQNDLKDRLRRDELAARADLKKNSMMLYSSLASIRHPEVAAAKANRDYVYKVLGAMDR  
ISTAVQATGSPSEPRPEEGAGELAFALDEFQVDMPELDFDEVHRPSLEERLESISGAALMADSSCTREDRERIVAECNAVRQAL  
QDLLQEYLNAGRRDKSDDLEAAVDHMMQKTKDLRRQLCKAVIDHVSDFLDTNIPILVLEAAQSGDEKQVKEYAQVVFREHANKL  
VEVANLACSMSSNEEGVKMVKMAAQIETLCPQVINAALTLAARPSKIAQDNMNVFKDAWLNQVQTLTEAVDEITTIENFLAV  
SEAHILEDVNTSCVVALQQGNPEMLDRKGGDIRGRTARICQVVI SEMEHYEPDYTTQKVVDSCEMLKSQVMPKFEARLETT  
INALAKDPQEDPQENEFIDSSRFVYD AVREVRAVLMIKNPEVDVDDSDIDAMDGSESGASRLSGKTVETESGPTDQTMRR  
LPEAEKAKILQNVQEFVKEKTLLEISKWDESNDIIVLAKSMCVIMMDMTDFTRGRGRLKNTSDVIDAAREIADAGSRLDKL  
ARAIAEVCPDSSVKQDQLLAYLQRIALYCHQLNMCQVKAQEVQNISGEMIVSGLDSATSLIQAAKNLMNAVVLTVKSSV  
YGSTKYRKAGTMHTDGI LWKMKKAPEKKPLIRREIGDDKKAPVRRASQKRLVNPQALSEFKADISF

>DmCTNNA

MLKPDKMGTLTDFGQIALKWDPKNLEIRTMSVEKTLEPLVLQVTTLVNTKGPSKKKKGRSKRASALVAAVEKATENFIQKGE  
QIAYENPDI TQEMLTAVDEVKKTGDAMSAAREFSEDPCCSLKRGNMVRAARNLLSAVTRLLIADMDVHMLLRHRLRIVEDDL  
NKLKNASSQDELMDNMRQFGRNAGELIKQAAKRQQLKDPQLRDDLAAARAMLKKHSTMLLTASKVYVRHPELDELAKVNRD  
FILKQVCDVNTISDVAQKKSQPTDIYSGAGELAAALDDFDEGIVMDPMTYSEKRSRQLLEERLESISAAALMADADCTRD  
ERRERIVAECNAVRQALQDLLSEYMSNMSQKDNPSGLSRAIDQMCRRKTRDLRRQLRKAVVDHVSDFLETTPLLDLIEA  
AKSGNEKVRKSEIFTKHAEKLVANLVCSMSNEDGVKMRVYAAQIESLCPQVINAASILTVRPNKVAQENMTTYRQAW  
EVQVRILTEAVDDITTIIDFLAVSENHILEDVNVKCVMALQVGDARDLRATAGAIQGRSSRVCNVVEAEMDNYEPC  
IYTKRVLEAVKVLRDQVMMKFDQRVGAAGALSNSNKNKVDENDFIDASRLVYDGVREIRRAVLMNRSSEDLDT  
DEFEPVEDLTLETTRSRSAAHTGDQTVDEYDPISGICTAREAMRKMTEDKQKIAQQVELFRREKLTDFDSEVAK  
WDDTGNDIIFLAKHMCIMMEMTDFTRGRGPLKTTMDVINAAKIISEAGTKLDKLTREIAEQCPESSTKDLLAYLQ  
RIALYCHQIQITSKVKADVQNISGELIVSGLDSATSLIQAAKNLMNAVVLTVKYSYVASTKYTRQGTVSSP  
IVVWLMKKAPEKKPLVRPEKPEEVRAKVRKGSQKQVQNP IHALSEFQSPADAV
