# Supplementary material for: Origin and Loss of Nested LRRTM/α-Catenin Genes during Vertebrate Evolution
Source: PubMed Central journal article supplement (PMC3933685; doi:10.1371/journal.pone.0089910), 2014-02-24
Supplement: pone.0089910.s011.pdf [file pone.0089910.s011.pdf]

**Table S4.** BLASTP analysis of tunicate and lancelet genomes using lamprey LRRTM sequences as query and reciprocal BLASTP analysis against all vertebrate genomes

| Query sequence | Best BLASTP hit [ <i>species</i> ]                                      | Accession number | E-value | Best reciprocal BLASTP hit* [ <i>species</i> ]                                   |
|----------------|-------------------------------------------------------------------------|------------------|---------|----------------------------------------------------------------------------------|
| LRRTM_A        | slit homolog protein 2<br>[ <i>Ciona intestinalis</i> ]                 | XP_002124095     | 3e-29   | slit homolog 2<br>[ <i>Melopsittacus undulatus</i> ]                             |
|                | hypothetical protein ID:<br>92046 [ <i>Branchiostoma<br/>floridae</i> ] | XP_002606179     | 3e-44   | slit homolog 3<br>[ <i>Sarcophilus harrisii</i> ]                                |
| LRRTM_B        | vasorin-like<br>[ <i>Ciona intestinalis</i> ]                           | XP_002128185     | 2e-29   | vasorin precursor<br>[ <i>Xenopus (Silurana)<br/>tropicalis</i> ]                |
|                | hypothetical protein ID:<br>88462 [ <i>Branchiostoma<br/>floridae</i> ] | XP_002611139     | 4e-46   | leucine-rich repeat-<br>containing protein 15-like<br>[ <i>Maylandia zebra</i> ] |

\*Reciprocal BLASTP was run against vertebrates (taxid:7742) with default parameters except that low complexity filter was on and compositional adjustments option was off.
