# Supplementary material for: Origin and Loss of Nested LRRTM/α-Catenin Genes during Vertebrate Evolution
Source: PubMed Central journal article supplement (PMC3933685; doi:10.1371/journal.pone.0089910), 2014-02-24
Supplement: pone.0089910.s012.pdf [file pone.0089910.s012.pdf]

Table S5. Amino acid sequence identity (%) between vertebrate LRRTMs.

|            | LRRTM1 |    |    |    |    |    | LRRTM2 |    |    |    |    |    | LRRTM3 |    |    |    |    | LRRTM4 |    |    |    |    |    |      |      | Lamprey |      |    |    |    |
|------------|--------|----|----|----|----|----|--------|----|----|----|----|----|--------|----|----|----|----|--------|----|----|----|----|----|------|------|---------|------|----|----|----|
|            | Hs     | Gg | Xt | Lc | Dr | Lo | Cm     | Hs | Gg | Lc | Dr | Lo | Cm     | Hs | Gg | Xt | Lc | Lo     | Cm | Hs | Gg | Xt | Lc | Dr_1 | Dr_2 | Dr_3    | Dr_4 | Lo | Cm | A  |
| HsLRRTM1   | 82     | 78 | 76 | 65 | 73 | 67 | 47     | 46 | 46 | 49 | 47 | 48 | 46     | 46 | 45 | 46 | 46 | 37     | 46 | 47 | 46 | 48 | 43 | 45   | 42   | 42      | 46   | 38 | 45 | 42 |
| GgLRRTM1   | 82     | 83 | 80 | 70 | 78 | 69 | 48     | 47 | 48 | 49 | 48 | 50 | 46     | 46 | 46 | 47 | 47 | 38     | 45 | 46 | 46 | 47 | 43 | 44   | 41   | 41      | 45   | 39 | 46 | 42 |
| XtLRRTM1   | 78     | 83 | 79 | 69 | 77 | 68 | 47     | 47 | 48 | 48 | 46 | 48 | 44     | 45 | 44 | 45 | 45 | 36     | 45 | 45 | 46 | 46 | 43 | 44   | 41   | 40      | 44   | 37 | 43 | 42 |
| LcLRRTM1   | 76     | 80 | 79 | 71 | 79 | 71 | 48     | 47 | 48 | 50 | 47 | 48 | 46     | 46 | 45 | 47 | 46 | 39     | 45 | 46 | 46 | 47 | 44 | 44   | 42   | 40      | 45   | 39 | 44 | 43 |
| DrLRRTM1   | 65     | 70 | 69 | 71 | 80 | 66 | 48     | 47 | 48 | 49 | 46 | 47 | 44     | 45 | 43 | 45 | 45 | 38     | 45 | 45 | 45 | 45 | 41 | 42   | 40   | 39      | 43   | 38 | 43 | 41 |
| LoLRRTM1   | 73     | 78 | 77 | 79 | 80 | 72 | 50     | 49 | 50 | 51 | 48 | 50 | 47     | 47 | 46 | 48 | 47 | 38     | 48 | 48 | 48 | 49 | 45 | 46   | 42   | 42      | 47   | 39 | 46 | 42 |
| CmLRRTM1   | 67     | 69 | 68 | 71 | 66 | 72 | 54     | 53 | 52 | 55 | 49 | 51 | 48     | 48 | 45 | 49 | 48 | 42     | 44 | 44 | 46 | 47 | 42 | 41   | 40   | 41      | 43   | 40 | 41 | 39 |
| HsLRRTM2   | 47     | 48 | 47 | 48 | 48 | 50 | 54     | 89 | 76 | 70 | 65 | 69 | 44     | 44 | 42 | 44 | 44 | 30     | 42 | 41 | 42 | 42 | 41 | 38   | 41   | 38      | 41   | 29 | 42 | 40 |
| GgLRRTM2   | 46     | 47 | 47 | 47 | 47 | 49 | 53     | 89 | 71 | 67 | 64 | 70 | 43     | 43 | 41 | 43 | 43 | 30     | 42 | 41 | 41 | 42 | 42 | 39   | 40   | 38      | 41   | 28 | 42 | 38 |
| LcLRRTM2   | 46     | 48 | 48 | 48 | 48 | 50 | 52     | 76 | 71 | 74 | 67 | 71 | 44     | 44 | 42 | 44 | 43 | 30     | 43 | 43 | 44 | 44 | 41 | 39   | 42   | 39      | 41   | 28 | 42 | 41 |
| DrLRRTM2   | 49     | 49 | 48 | 50 | 49 | 51 | 55     | 70 | 67 | 74 | 67 | 72 | 45     | 44 | 41 | 44 | 44 | 34     | 44 | 43 | 44 | 45 | 40 | 38   | 39   | 39      | 43   | 34 | 39 | 39 |
| LoLRRTM2   | 47     | 48 | 46 | 47 | 46 | 48 | 49     | 65 | 64 | 67 | 67 | 84 | 42     | 42 | 41 | 42 | 42 | 29     | 41 | 42 | 42 | 41 | 40 | 38   | 39   | 38      | 40   | 26 | 39 | 38 |
| CmLRRTM2   | 48     | 50 | 48 | 48 | 47 | 50 | 51     | 69 | 70 | 71 | 72 | 84 | 44     | 44 | 42 | 43 | 44 | 30     | 42 | 43 | 43 | 43 | 41 | 39   | 41   | 39      | 42   | 30 | 42 | 40 |
| HsLRRTM3   | 46     | 46 | 44 | 46 | 44 | 47 | 48     | 44 | 43 | 44 | 45 | 42 | 44     | 97 | 76 | 89 | 85 | 74     | 62 | 63 | 62 | 64 | 56 | 53   | 53   | 52      | 60   | 53 | 56 | 53 |
| GgLRRTM3   | 46     | 46 | 45 | 46 | 45 | 47 | 48     | 44 | 43 | 44 | 44 | 42 | 44     | 97 | 76 | 89 | 85 | 74     | 62 | 63 | 62 | 64 | 57 | 53   | 54   | 52      | 61   | 54 | 55 | 53 |
| XtLRRTM3   | 45     | 46 | 44 | 45 | 43 | 46 | 45     | 42 | 41 | 42 | 41 | 41 | 42     | 76 | 76 | 71 | 70 | 54     | 54 | 55 | 54 | 56 | 50 | 49   | 51   | 49      | 53   | 46 | 50 | 47 |
| LcLRRTM3   | 46     | 47 | 45 | 47 | 45 | 48 | 49     | 44 | 43 | 44 | 44 | 42 | 43     | 89 | 89 | 71 | 87 | 74     | 62 | 63 | 61 | 64 | 57 | 54   | 53   | 51      | 61   | 53 | 54 | 53 |
| LoLRRTM3   | 46     | 47 | 45 | 46 | 45 | 47 | 48     | 44 | 43 | 43 | 44 | 42 | 44     | 85 | 85 | 70 | 87 | 70     | 61 | 61 | 60 | 63 | 56 | 53   | 54   | 52      | 60   | 53 | 54 | 53 |
| CmLRRTM3   | 37     | 38 | 36 | 39 | 38 | 38 | 42     | 30 | 30 | 30 | 34 | 29 | 30     | 74 | 72 | 54 | 74 | 70     | 57 | 59 | 59 | 62 | 56 | 49   | 45   | 43      | 57   | 57 | 50 | 38 |
| HsLRRTM4   | 46     | 45 | 45 | 45 | 45 | 48 | 44     | 42 | 42 | 43 | 44 | 41 | 42     | 62 | 63 | 54 | 62 | 61     | 57 | 90 | 83 | 84 | 68 | 62   | 57   | 55      | 73   | 57 | 53 | 50 |
| GgLRRTM4   | 47     | 46 | 45 | 46 | 45 | 48 | 44     | 41 | 41 | 43 | 43 | 42 | 43     | 63 | 63 | 55 | 63 | 61     | 59 | 90 | 82 | 86 | 68 | 63   | 56   | 55      | 74   | 56 | 54 | 50 |
| XtLRRTM4   | 46     | 46 | 46 | 46 | 45 | 48 | 46     | 42 | 41 | 44 | 44 | 42 | 43     | 62 | 62 | 54 | 61 | 60     | 59 | 83 | 82 | 80 | 68 | 63   | 57   | 56      | 72   | 56 | 55 | 51 |
| LcLRRTM4   | 48     | 47 | 46 | 47 | 45 | 49 | 47     | 42 | 42 | 44 | 45 | 41 | 43     | 64 | 64 | 56 | 64 | 63     | 62 | 84 | 86 | 80 | 71 | 64   | 58   | 57      | 74   | 59 | 57 | 52 |
| DrLRRTM4_1 | 43     | 43 | 43 | 44 | 41 | 45 | 42     | 41 | 42 | 41 | 40 | 40 | 41     | 56 | 57 | 50 | 57 | 56     | 56 | 68 | 68 | 68 | 71 | 71   | 61   | 60      | 80   | 54 | 54 | 49 |
| DrLRRTM4_2 | 45     | 44 | 44 | 44 | 42 | 46 | 41     | 38 | 39 | 39 | 38 | 38 | 39     | 53 | 53 | 49 | 54 | 53     | 49 | 62 | 63 | 63 | 64 | 71   | 58   | 58      | 74   | 50 | 50 | 47 |
| DrLRRTM4_3 | 42     | 41 | 41 | 42 | 40 | 42 | 40     | 41 | 40 | 42 | 39 | 39 | 41     | 53 | 54 | 51 | 53 | 54     | 45 | 57 | 56 | 57 | 58 | 61   | 58   | 65      | 63   | 45 | 50 | 45 |
| DrLRRTM4_4 | 42     | 41 | 40 | 40 | 39 | 42 | 41     | 38 | 38 | 39 | 39 | 38 | 39     | 52 | 52 | 49 | 51 | 52     | 43 | 55 | 55 | 56 | 57 | 60   | 58   | 65      | 63   | 43 | 48 | 44 |
| LoLRRTM4   | 46     | 45 | 44 | 45 | 43 | 47 | 43     | 41 | 41 | 41 | 43 | 40 | 42     | 60 | 61 | 53 | 61 | 60     | 57 | 73 | 74 | 72 | 74 | 80   | 74   | 63      | 63   | 56 | 54 | 51 |
| CmLRRTM4   | 38     | 39 | 37 | 39 | 38 | 39 | 40     | 29 | 28 | 28 | 34 | 26 | 30     | 53 | 54 | 46 | 53 | 53     | 57 | 57 | 56 | 56 | 59 | 54   | 50   | 45      | 43   | 56 | 44 | 40 |
| PmLRRTM_A  | 45     | 46 | 43 | 44 | 43 | 46 | 41     | 42 | 42 | 42 | 39 | 39 | 42     | 56 | 55 | 50 | 54 | 54     | 50 | 53 | 54 | 55 | 57 | 54   | 50   | 50      | 48   | 54 | 44 | 47 |
| PmLRRTM_B  | 42     | 42 | 42 | 43 | 41 | 42 | 39     | 40 | 38 | 41 | 39 | 38 | 40     | 53 | 53 | 47 | 53 | 53     | 38 | 50 | 50 | 51 | 52 | 49   | 47   | 45      | 44   | 51 | 40 | 47 |

The sequence identity values were calculated from the alignment shown in Fig. S1. Cm = *Callorhynchus milii* (elephant shark), Dr = *Danio rerio* (zebrafish), Gg = *Gallus gallus* (chicken), Hs = *Homo sapiens*, Lc = *Latimeria chalumnae* (coelacanth), Lo = *Lepisosteus oculatus* (spotted gar), Pm = *Petromyzon marinus* (sea lamprey), Xt = *Xenopus tropicalis* (African clawed frog). Note that values corresponding to the shark orthologs are based on partial sequence data.
