# Supplementary material for: Origin and Loss of Nested LRRTM/α-Catenin Genes during Vertebrate Evolution
Source: PubMed Central journal article supplement (PMC3933685; doi:10.1371/journal.pone.0089910), 2014-02-24
Supplement: pone.0089910.s013.pdf [file pone.0089910.s013.pdf]

**Table S6. Neurexin AS4 dbEST TBLASTN search results, alignment score table and list of validated hits for human, mouse, *Xenopus*, zebrafish, sea lamprey and *Ciona* ESTs.**

In parentheses are given the number of AS4 splice variants vs. number of hits fulfilling the search criteria and containing at least part of this sequence area. The AS4 exon sequence is highlighted in yellow. The alignments were generated using a 160 residue mouse neurexin-1 fragment as a query (described in Fig. S5) using BLOSUM62 matrix and default Entrez BLAST settings.

**HUMAN (9/23 splice variants)**

| Sequences producing significant alignments:                      | (Bits) | Value |
|------------------------------------------------------------------|--------|-------|
| emb BX431035.2  BX431035 Homo sapiens FETAL BRAIN Homo sapien... | 216    | 8e-70 |
| gb CN262436.1  17000600092091 GRN_PRENEU Homo sapiens cDNA 5'... | 206    | 2e-66 |
| dbj DB171492.1  DB171492 TKIDN2 Homo sapiens cDNA clone TKIDN... | 198    | 3e-62 |
| dbj DB488484.1  DB488484 RIKEN full-length enriched human cDN... | 196    | 6e-62 |
| dbj DB218625.1  DB218625 TRACH3 Homo sapiens cDNA clone TRACH... | 183    | 3e-56 |
| dbj DB462876.1  DB462876 RIKEN full-length enriched human cDN... | 178    | 1e-54 |
| emb BX431034.2  BX431034 Homo sapiens FETAL BRAIN Homo sapien... | 177    | 2e-54 |
| dbj HY001490.1  HY001490 RIKEN full-length enriched human cDN... | 177    | 4e-54 |
| dbj DB476019.1  DB476019 RIKEN full-length enriched human cDN... | 172    | 2e-52 |
| gb CB154877.1  K-EST0212952 B2N807043 Homo sapiens cDNA clone... | 166    | 7e-50 |
| gb BF345183.1  602018394F1 NCI_CGAP_Brn67 Homo sapiens cDNA c... | 161    | 1e-46 |
| dbj DA747306.1  DA747306 NT2RP7 Homo sapiens cDNA clone NT2RP... | 157    | 5e-46 |
| dbj HY037592.1  HY037592 RIKEN full-length enriched human cDN... | 144    | 2e-41 |
| dbj DB465352.1  DB465352 RIKEN full-length enriched human cDN... | 139    | 8e-40 |
| gb BF529228.1  602041680F1 NCI_CGAP_Brn67 Homo sapiens cDNA c... | 94.7   | 1e-37 |
| dbj HY044110.1  HY044110 RIKEN full-length enriched human cDN... | 134    | 2e-37 |
| gb BQ723058.1  AGENCOURT_8109177 Lupski sympathetic trunk Hom... | 127    | 2e-33 |
| gb BG913108.1  602811713F1 NCI_CGAP_Brn67 Homo sapiens cDNA c... | 120    | 9e-31 |
| dbj HY135994.1  HY135994 RIKEN full-length enriched human cDN... | 116    | 2e-30 |
| dbj DA690044.1  DA690044 NT2NE2 Homo sapiens cDNA clone NT2NE... | 105    | 3e-26 |
| gb AW894889.1  CM1-NN0033-110400-181-e04 NN0033 Homo sapiens ... | 100    | 2e-24 |
| gb BQ879316.1  AGENCOURT_8113386 Lupski dorsal root ganglion ... | 99.8   | 3e-23 |
| dbj DA745012.1  DA745012 NT2RP7 Homo sapiens cDNA clone NT2RP... | 94.4   | 8e-22 |
| gb AA984057.1  am76b03.s1 Stratagene schizo brain S11 Homo sa... | 63.9   | 4e-21 |
| gb CB991846.1  AGENCOURT_13618102 NIH_MGC_148 Homo sapiens cD... | 92.8   | 7e-21 |
| gb CB994026.1  AGENCOURT_13617369 NIH_MGC_148 Homo sapiens cD... | 93.2   | 8e-21 |
| gb EL737097.1  14205 Full Length cDNA from the Mammalian Gene... | 91.7   | 9e-21 |
| gb CB994400.1  AGENCOURT_13642788 NIH_MGC_148 Homo sapiens cD... | 92.4   | 1e-20 |
| gb BM724595.1  UI-E-E01-aiz-1-10-0-UI.r1 UI-E-E01 Homo sapien... | 88.6   | 4e-20 |
| gb BG820026.1  602782573F1 NCI_CGAP_Brn67 Homo sapiens cDNA c... | 88.2   | 6e-20 |
| gb BM801146.1  AGENCOURT_6422532 NIH_MGC_92 Homo sapiens cDNA... | 85.5   | 6e-18 |
| dbj DB464606.2  DB464606 RIKEN full-length enriched human cDN... | 82.4   | 3e-17 |
| gb BF346913.1  602021742F1 NCI_CGAP_Brn67 Homo sapiens cDNA c... | 71.2   | 9e-14 |

**ALIGNMENTS**

>emb|BX431035.2| BX431035 Homo sapiens FETAL BRAIN Homo sapiens cDNA clone CS0DF015YG21 5-PRIME, mRNA sequence. Length=451

Score = 216 bits (551), Expect = 8e-70, Method: Compositional matrix adjust.  
 Identities = 114/148 (77%), Positives = 117/148 (79%), Gaps = 30/148 (20%)  
 Frame = +1

|       |     |                                                                       |     |
|-------|-----|-----------------------------------------------------------------------|-----|
| Query | 1   | QGKIGVKFNVGTDDIAIEESNAIINDGKYHVVRFRTRSGGNATLQVDSWPVIERYPA <b>GNND</b> | 60  |
| Sbjct | 4   | QGKIGVKFNVGTDDIAIEESNAIINDGKYHVVRFRTRSGGNATLQVDSWPVIERYPA----         | 171 |
| Query | 61  | <b>NERLAIARQRIPYRLGRVVDEWLLDK</b> GRQLTIFNSQATIIIGGKEQGQPFQGLSGLYYN   | 120 |
| Sbjct | 172 | -----GRQLTIFNSQATIIIGGKEQGQPFQGLSGLYYN                                | 273 |

Query 121 GLKVLNMAAENDANIAIVGNVRLVGEVP 148  
GL+ L+MAAENDA+IAIVGNVRLVGEVP  
Sbjct 274 GLESLDMAAENDAHAIAIVGNVRLVGEVP 357

>gb|CN262436.1| 17000600092091 GRN\_PRENEU Homo sapiens cDNA 5', mRNA sequence.  
Length=307

Score = 206 bits (525), Expect = 2e-66, Method: Compositional matrix adjust.  
Identities = 101/101 (100%), Positives = 101/101 (100%), Gaps = 0/101 (0%)  
Frame = +1

Query 1 QGKIGVKFNVGTDDIAIEESNAIINDGKYHVVRFTRSGGNATLQVDSWPVIERYPAGNND 60  
QGKIGVKFNVGTDDIAIEESNAIINDGKYHVVRFTRSGGNATLQVDSWPVIERYPAGNND  
Sbjct 4 QGKIGVKFNVGTDDIAIEESNAIINDGKYHVVRFTRSGGNATLQVDSWPVIERYPAGNND 183

Query 61 NERLAIARQRIPYRLGRVVDEWLLDKGRQLTIFNSQATIII 101  
NERLAIARQRIPYRLGRVVDEWLLDKGRQLTIFNSQATIII  
Sbjct 184 NERLAIARQRIPYRLGRVVDEWLLDKGRQLTIFNSQATIII 306

>dbj|DB171492.1| DB171492 TKIDN2 Homo sapiens cDNA clone TKIDN2006442 5', mRNA  
sequence. Length=569

Score = 198 bits (504), Expect = 3e-62, Method: Compositional matrix adjust.  
Identities = 92/131 (70%), Positives = 110/131 (84%), Gaps = 0/131 (0%)  
Frame = +2

Query 18 EESNAIINDGKYHVVRFTRSGGNATLQVDSWPVIERYPAGNNDNERLAIARQRIPYRLGR 77  
+E +NDGKYHVVRFTR+GGNATLQVD+WPV E YP GN DNER + +Q+IP++ R  
Sbjct 2 KEERTPVNDGKYHVVRFTRNGGNATLQVDNWPVNEHYPTGNTDNERFQMVKQKIPFKYNR 181

Query 78 VVDEWLLDKGRQLTIFNSQATIIIIGGKEQGQPFQGLSGLYYNGLKVLNMAAENDANIAI 137  
V+EWL +KGRQLTIFN+QA I IGK++G+ FQGQLSGLYY+GLKVLNMAAEN+ NI I  
Sbjct 182 PVEEWLQEKGRLTIFNTQAQIAIGGKDKGRLFQGLSGLYYDGLKVLNMAAENNPNIKI 361

Query 138 VGNVRLVGEVP 148  
G+VRLVGEVP  
Sbjct 362 NGSVRLVGEVP 394

>dbj|DB488484.1| DB488484 RIKEN full-length enriched human cDNA library,  
hypothalamus Homo sapiens cDNA clone H033022N07 5', mRNA sequence. Length=453

Score = 196 bits (499), Expect = 6e-62, Method: Compositional matrix adjust.  
Identities = 94/94 (100%), Positives = 94/94 (100%), Gaps = 0/94 (0%)  
Frame = +1

Query 54 YPAGNNDNERLAIARQRIPYRLGRVVDEWLLDKGRQLTIFNSQATIIIIGGKEQGQPFQGG 113  
YPAGNNDNERLAIARQRIPYRLGRVVDEWLLDKGRQLTIFNSQATIIIIGGKEQGQPFQGG  
Sbjct 1 YPAGNNDNERLAIARQRIPYRLGRVVDEWLLDKGRQLTIFNSQATIIIIGGKEQGQPFQGG 180

Query 114 LSGLYYNGLKVLNMAAENDANIAIVGNVRLVGEV 147  
LSGLYYNGLKVLNMAAENDANIAIVGNVRLVGEV  
Sbjct 181 LSGLYYNGLKVLNMAAENDANIAIVGNVRLVGEV 282

>dbj|DB218625.1| DB218625 TRACH3 Homo sapiens cDNA clone TRACH3008421 5', mRNA  
sequence. Length=560

Score = 183 bits (465), Expect = 3e-56, Method: Compositional matrix adjust.  
Identities = 95/125 (76%), Positives = 95/125 (76%), Gaps = 30/125 (24%)

Frame = +1

```
Query 24 INDGKYHVVRFRTRSGGNATLQVDSWPVIERYPAGNNDNERLAIARQRIPYRLGRVVDEWL 83
INDGKYHVVRFRTRSGGNATLQVDSWPVIERYPAG
Sbjct 1 INDGKYHVVRFRTRSGGNATLQVDSWPVIERYPAG----- 102

Query 84 LDKGRQLTIFNSQATIIIGGKEQGQPFQQLSGLYYNGLKVLNMAAENDANIAIVGNVRL 143
RQLTIFNSQATIIIGGKEQGQPFQQLSGLYYNGLKVLNMAAENDANIAIVGNVRL
Sbjct 103 ----RQLTIFNSQATIIIGGKEQGQPFQQLSGLYYNGLKVLNMAAENDANIAIVGNVRL 270

Query 144 VGEVP 148
VGEVP
Sbjct 271 VGEVP 285
```

>dbj|DB462876.1| DB462876 RIKEN full-length enriched human cDNA library, hippocampus  
Homo sapiens cDNA clone H023002C01 5', mRNA sequence. Length=480

Score = 178 bits (451), Expect = 1e-54, Method: Compositional matrix adjust.  
Identities = 85/85 (100%), Positives = 85/85 (100%), Gaps = 0/85 (0%)  
Frame = +3

```
Query 64 LAIARQRIPYRLGRVVDEWLLDKGRQLTIFNSQATIIIGGKEQGQPFQQLSGLYYNGLK 123
LAIARQRIPYRLGRVVDEWLLDKGRQLTIFNSQATIIIGGKEQGQPFQQLSGLYYNGLK
Sbjct 3 LAIARQRIPYRLGRVVDEWLLDKGRQLTIFNSQATIIIGGKEQGQPFQQLSGLYYNGLK 182

Query 124 VLNMAAENDANIAIVGNVRLVGEVP 148
VLNMAAENDANIAIVGNVRLVGEVP
Sbjct 183 VLNMAAENDANIAIVGNVRLVGEVP 257
```

>emb|BX431034.2| BX431034 Homo sapiens FETAL BRAIN Homo sapiens cDNA clone  
CS0DF015YG21 5-PRIME, mRNA sequence. Length=420

Score = 177 bits (448), Expect = 2e-54, Method: Compositional matrix adjust.  
Identities = 93/129 (72%), Positives = 97/129 (75%), Gaps = 30/129 (23%)  
Frame = +1

```
Query 1 QGKIGVKFNVGTDDIAIEESNAIINDGKYHVVRFRTRSGGNATLQVDSWPVIERYPAGNND 60
QGKIGVKFNVGTDDIAIEESNAIINDGKYHVVRFRTRSGGNATLQVDSWPVIERYPA
Sbjct 4 QGKIGVKFNVGTDDIAIEESNAIINDGKYHVVRFRTRSGGNATLQVDSWPVIERYPA---- 171

Query 61 NERLAIARQRIPYRLGRVVDEWLLDKGRQLTIFNSQATIIIGGKEQGQPFQQLSGLYYN 120
GRQLTIFNSQA IIGGKEQGQPFQQLSGLYYN
Sbjct 172 -----GRQLTIFNSQAPIIIGGKEQGQPFQQLSGLYYN 273

Query 121 GLKVLNMAA 129
GL+VL++ +
Sbjct 274 GLEVLDLGS 300
```

>dbj|HY001490.1| HY001490 RIKEN full-length enriched human cDNA library, testis  
Homo sapiens cDNA clone H04D005J11, mRNA sequence. Length=529

Score = 177 bits (449), Expect = 4e-54, Method: Compositional matrix adjust.  
Identities = 85/95 (89%), Positives = 89/95 (94%), Gaps = 0/95 (0%)  
Frame = +2

```
Query 1 QGKIGVKFNVGTDDIAIEESNAIINDGKYHVVRFRTRSGGNATLQVDSWPVIERYPAGNND 60
QG +GV FNVGTDDI I+E NAI++DGKYHVVRFRTRSGGNATLQVDSWPV ERYPA G D
Sbjct 239 QGTGVVIFNVGTDDITIDEPNNAIVSDGKYHVVRFRTRSGGNATLQVDSWPVNERYPAGNFD 418
```

Query 61 NERLAIARQRIPYRLGRVVDEWLLDKGRQLTIFNS 95  
NERLAIARQRIPYRLGRVVDEWLLDKGRQLTIFNS  
Sbjct 419 NERLAIARQRIPYRLGRVVDEWLLDKGRQLTIFNS 523

>dbj|DB476019.1| DB476019 RIKEN full-length enriched human cDNA library, hippocampus  
Homo sapiens cDNA clone H023069F15 5', mRNA sequence. Length=487

Score = 172 bits (437), Expect = 2e-52, Method: Compositional matrix adjust.  
Identities = 83/85 (98%), Positives = 83/85 (98%), Gaps = 0/85 (0%)  
Frame = +3

Query 64 LAIARQRIPYRLGRVVDEWLLDKGRQLTIFNSQATIIIGGKEQGQPFQGLSGLYYNGLK 123  
L IARQRIPYRLGRVVDEWLLDKGRQ TIFNSQATIIIGGKEQGQPFQGLSGLYYNGLK  
Sbjct 3 LPIARQRIPYRLGRVVDEWLLDKGRQXTIFNSQATIIIGGKEQGQPFQGLSGLYYNGLK 182

Query 124 VLNMAAENDANIAIVGNVRLVGEVP 148  
VLNMAAENDANIAIVGNVRLVGEVP  
Sbjct 183 VLNMAAENDANIAIVGNVRLVGEVP 257

>gb|CB154877.1| K-EST0212952 B2N807043 Homo sapiens cDNA clone B2N807043-26-H08  
5', mRNA sequence. Length=465

Score = 166 bits (419), Expect = 7e-50, Method: Compositional matrix adjust.  
Identities = 85/135 (63%), Positives = 96/135 (71%), Gaps = 30/135 (22%)  
Frame = +3

Query 1 QGKIGVKFNVGTDDIAIEESNAIINDGKYHVVRFTSRGGNATLQVDSWPVIERYPAGNND 60  
QG +GV FNVGTDDI I+E NAI++DGKYHVVRFTSRGGNATLQVDSWPV ERYPA  
Sbjct 144 QGTGVIFNVGTDDITIDEPNIAIVSDGKYHVVRFTSRGGNATLQVDSWPVNERYPAAAA 311

Query 61 NERLAIARQRIPYRLGRVVDEWLLDKGRQLTIFNSQATIIIGGKEQGQPFQGLSGLYYN 120  
GRQLTIFNSQA I IGG++QG+PFQGG+SGLYYN  
Sbjct 312 -----GRQLTIFNSQAAIKIGGRDQGRPFQGVVSGLYYN 413

Query 121 GLKVLNMAAENDANI 135  
GLKVL +AAE+D N+  
Sbjct 414 GLKVLALAAESDPNV 458

>gb|BF345183.1| 602018394F1 NCI\_CGAP\_Brn67 Homo sapiens cDNA clone IMAGE:4153894  
5', mRNA sequence. Length=826

Score = 161 bits (408), Expect = 1e-46, Method: Compositional matrix adjust.  
Identities = 88/149 (59%), Positives = 99/149 (66%), Gaps = 31/149 (21%)  
Frame = +3

Query 1 QGKIGVKFNVGTDDIAIEESNAIINDGKYHVVRFTSRGGNATLQVDSWPVIERYPAGNND 60  
QG +GV FNVGTDDI I+E NAI++DGKYHVVRFTSRGGNATLQVDSWPV ERYPA  
Sbjct 300 QGTGVIFNVGTDDITIDEPNIAIVSDGKYHVVRFTSRGGNATLQVDSWPVNERYPAAAA 467

Query 61 NERLAIARQRIPYRLGRVVDEWLLDKGRQLTIFNSQATIIIGGKEQGQPFQGLSGLYYN 120  
GRQLTIFNSQA I IGG++QG+PFQGG+SGLYYN  
Sbjct 468 -----GRQLTIFNSQAAIKIGGRDQGRPFQGVVSGLYYN 569

Query 121 GLKVLNMAAENDANIAIVGNVRLVGEVP 148  
GLKVL E + G++RLVGE P  
Sbjct 570 GLKVLAAGRRERPQMLRTEGHLRLVGEVP 656

>dbj|DA747306.1| DA747306 NT2RP7 Homo sapiens cDNA clone NT2RP7012472 5', mRNA sequence. Length=554

Score = 157 bits (396), Expect = 5e-46, Method: Compositional matrix adjust.  
Identities = 72/110 (65%), Positives = 88/110 (80%), Gaps = 0/110 (0%)  
Frame = +3

Query 1 QGKIGVKFNVGTDDIAIEESNAIINDGKYHVVRFRTRSGGNATLQVDSWPVIERYPA**GNND** 60  
QKIGV FN+GT DI+I+E +NDGKYHVVRFRTR+GGNATLQVD+WPV E YP GN D  
Sbjct 225 QGKIGVVFNIGTVDISIKEERTPVNDGKYHVVRFRTRNGGNATLQVDNWPVNEHYPTGNTD 404  
Query 61 **NERLAIARQRIPYRLGRVVDEWLLDKGR**QLTIFNSQATIIIGGKEQGQPF 110  
NER + +Q+IP++ R V+EWL +KGRQLTIFN+QA I IGGK++ P  
Sbjct 405 NERFQMVKQKIPFKYNRPVEEWLQEKGRQLTIFNTQAQIAIGGKDKRTPL 554

>dbj|HY037592.1| HY037592 RIKEN full-length enriched human cDNA library, testis Homo sapiens cDNA clone H04D131C20, mRNA sequence. Length=467

Score = 144 bits (363), Expect = 2e-41, Method: Compositional matrix adjust.  
Identities = 69/79 (87%), Positives = 73/79 (92%), Gaps = 0/79 (0%)  
Frame = +1

Query 1 QGKIGVKFNVGTDDIAIEESNAIINDGKYHVVRFRTRSGGNATLQVDSWPVIERYPA**GNND** 60  
QG +GV FNVGTDDI I+E NAI++DGKYHVVRFRTRSGGNATLQVDSWPV ERYPA GN D  
Sbjct 229 QGTVGVI FNVGTDDITIDEPNNAIVSDGKYHVVRFRTRSGGNATLQVDSWPVNERYPAGNFD 408  
Query 61 **NERLAIARQRIPYRLGRVV** 79  
NERLAIARQRIPYRLGRVV  
Sbjct 409 NERLAIARQRIPYRLGRVV 465

>dbj|DB465352.1| DB465352 RIKEN full-length enriched human cDNA library, hippocampus Homo sapiens cDNA clone H023016C09 5', mRNA sequence. Length=429

Score = 139 bits (351), Expect = 8e-40, Method: Compositional matrix adjust.  
Identities = 69/70 (99%), Positives = 69/70 (99%), Gaps = 0/70 (0%)  
Frame = +1

Query 79 **VDEWLLDKGR**QLTIFNSQATIIIGGKEQGQPFQGLSGLYYNGLKVLNMAAENDANIAIV 138  
VDEWLLDKGRQLTIFNSQATIIIGGKEQGQPFQGLSGLYYNGLKVLNMAAENDA IAIV  
Sbjct 1 VDEWLLDKGRQLTIFNSQATIIIGGKEQGQPFQGLSGLYYNGLKVLNMAAENDAKIAIV 180  
Query 139 GNVRLVGEVP 148  
GNVRLVGEVP  
Sbjct 181 GNVRLVGEVP 210

>gb|BF529228.1| 602041680F1 NCI\_CGAP\_Brn67 Homo sapiens cDNA clone IMAGE:4179690 5', mRNA sequence. Length=627

Score = 94.7 bits (234), Expect(2) = 1e-37, Method: Compositional matrix adjust.  
Identities = 51/102 (50%), Positives = 61/102 (60%), Gaps = 30/102 (29%)  
Frame = +1

Query 47 SWPVIERYPA**GNNDNERLAIARQRIPYRLGRVVDEWLLDKGR**QLTIFNSQATIIIGGKEQ 106  
+WPV ERYPAG RQLTIFNSQA I IGG++Q  
Sbjct 193 AWPVNERYPAG-----RQLTIFNSQAAIKIGGRDQ 282  
Query 107 GQPFQGLSGLYYNGLKVLNMAAENDANIAIVGNVRLVGEVP 148  
G+PFQGLSGLYYNGLKVL + AE++ N+ G +RLVGE P  
Sbjct 283 GRPFQGLSGLYYNGLKVLALDAESEPNVRTEGQLRLVGEVP 408

>dbj|HY044110.1| HY044110 RIKEN full-length enriched human cDNA library, testis  
Homo sapiens cDNA clone H04D155A10, mRNA sequence. Length=462

Score = 134 bits (336), Expect = 2e-37, Method: Compositional matrix adjust.  
Identities = 63/73 (86%), Positives = 67/73 (92%), Gaps = 0/73 (0%)  
Frame = +3

```
Query 1 QGKIGVKFNVGTDDIAIEESNAIINDGKYHVVRFTSRGGNATLQVDSWPVIERYPAGNND 60
      QG +GV FNVGTDDI I+E NAI++DGKYHVVRFTSRGGNATLQVDSWPV ERYPAGN D
Sbjct 243 QGTVGVIFNVGTDDITIDEPNAIVSDGKYHVVRFTSRGGNATLQVDSWPVNERYPAGNFD 422

Query 61 NERLAIARQRIPY 73
      NERLAIARQRIPY
Sbjct 423 NERLAIARQRIPY 461
```

>gb|BQ723058.1| AGENCOURT\_8109177 Lupski\_sympathetic\_trunk Homo sapiens cDNA  
clone IMAGE:6189515 5', mRNA sequence. Length=921

Score = 127 bits (319), Expect = 2e-33, Method: Compositional matrix adjust.  
Identities = 67/115 (58%), Positives = 76/115 (66%), Gaps = 30/115 (26%)  
Frame = +1

```
Query 34 FTRSGGNATLQVDSWPVIERYPAGNNDNERLAIARQRIPYRLGRVVDEWLLDKGRQLTIF 93
      FTRSGGNATLQVDSWPV ERYPA GRQLTIF
Sbjct 1 FTRSGGNATLQVDSWPVNERYP-----GRQLTIF 90

Query 94 NSQATIIIGGKEQGQPFQGLSGLYYNGLKVLNMAAENDANIAIVGNVRLVGEVP 148
      NSQA I IGG++QG+PFQGG+SGLYYNGLKVL +AAE+D N+ G++RLVGE P
Sbjct 91 NSQAAIKIGGRDQGRPFQGVVSGLYYNGKVLALAAESDPNVRTEGHLRLVGEVP 255
```

>gb|BG913108.1| 602811713F1 NCI\_CGAP\_Brn67 Homo sapiens cDNA clone IMAGE:4943715  
5', mRNA sequence. Length=1007

Score = 120 bits (302), Expect = 9e-31, Method: Compositional matrix adjust.  
Identities = 55/72 (76%), Positives = 64/72 (89%), Gaps = 0/72 (0%)  
Frame = +1

```
Query 77 RVVDEWLLDKGRQLTIFNSQATIIIGGKEQGQPFQGLSGLYYNGLKVLNMAAENDANIA 136
      RVVDEWLLDKGRQLTIFNSQA I IGG++QG+PFQGG+SGLYYNGLKVL +AAE+D N+
Sbjct 1 RVVDEWLLDKGRQLTIFNSQAAIKIGGRDQGRPFQGVVSGLYYNGKVLALAAESDPNVR 180

Query 137 IVGNVRLVGEVP 148
      G++RLVGE P
Sbjct 181 TEGHLRLVGEVP 216
```

>dbj|HY135994.1| HY135994 RIKEN full-length enriched human cDNA library, brain  
Homo sapiens cDNA clone H06D115F11, mRNA sequence. Length=480

Score = 116 bits (290), Expect = 2e-30, Method: Compositional matrix adjust.  
Identities = 54/71 (76%), Positives = 63/71 (89%), Gaps = 0/71 (0%)  
Frame = +1

```
Query 78 VVDEWLLDKGRQLTIFNSQATIIIGGKEQGQPFQGLSGLYYNGLKVLNMAAENDANIAI 137
      VVDEWLLDKGRQLTIFNSQA I IGG++QG+PFQGG+SGLYYNGLKVL +AAE+D N+
Sbjct 1 VVDEWLLDKGRQLTIFNSQAAIKIGGRDQGRPFQGVVSGLYYNGKVLALAAESDPNVRT 180

Query 138 VGNVRLVGEVP 148
      G++RLVGE P
Sbjct 181 EGHLRLVGEVP 213
```

>gb|AW894889.1| CM1-NN0033-110400-181-e04 NN0033 Homo sapiens cDNA, mRNA sequence. Length=437

Score = 100 bits (248), Expect = 2e-24, Method: Compositional matrix adjust. Identities = 46/67 (69%), Positives = 58/67 (87%), Gaps = 0/67 (0%)  
Frame = +1

Query 66 IARQRIPYRLGRVVDEWLLDKGRQLTIFNSQATIIIGGKEQGQPFQGLSGLYYNGLKVL 125  
+ Q+IP++ R V+EWL +KGRQLTIFN+QA I IGGK++G+ FQGQLSGLYY+GLKVL  
Sbjct 118 MVEQKIPFKYNRPVVEEWLQEKGRQLTIFNTQAQIAIGGKDKGRLFQGLSGLYYDGLKVL 297  
Query 126 NMAAEND 132  
NMAAEN+  
Sbjct 298 NMAAENN 318

>gb|BQ879316.1| AGENCOURT\_8113386 Lupski\_dorsal\_root\_ganglion Homo sapiens cDNA clone IMAGE:6178941 5', mRNA sequence. Length=940

Score = 99.8 bits (247), Expect = 3e-23, Method: Compositional matrix adjust. Identities = 51/76 (67%), Positives = 57/76 (75%), Gaps = 3/76 (4%)  
Frame = +1

Query 1 QGKIGVKFNVGTDDIAIEESNAIINDGKYHVVRFTSRGGNATLQVDSWPVIERYPA GNND 60  
QG +GV FNVGTDDI I+E NAI++DGKYHVVRFTSRGGNATLQ DSW V ERY P G  
Sbjct 334 QGTVGVI FNVGTDDITIDEPNAI VSDGKYHVVRFTSRGGNATLQADSWTVNERYP-GQPP 510  
Query 61 NERLAIARQRIPYRLG 76  
E L + R+P R G  
Sbjct 511 AEHL--QQPRLPSRSG 552

>dbj|DA745012.1| DA745012 NT2RP7 Homo sapiens cDNA clone NT2RP7009828 5', mRNA sequence. Length=564

Score = 94.4 bits (233), Expect = 8e-22, Method: Compositional matrix adjust. Identities = 51/97 (53%), Positives = 58/97 (60%), Gaps = 30/97 (31%)  
Frame = +2

Query 1 QGKIGVKFNVGTDDIAIEESNAIINDGKYHVVRFTSRGGNATLQVDSWPVIERYPA GNND 60  
QGKIGV FN+GT DI+I+E +NDGKYHVVRFTSR+GGNATLQVD+WPV E YP  
Sbjct 362 QGKIGVFNIGTVDISIKEERTPVNDGKYHVVRFTSRNGGNATLQVDNWPVNEHYPT---- 529  
Query 61 NERLAIARQRIPYRLGRVVDEWLLDKGRQLTIFNSQA 97  
GRQLTIFN+QA  
Sbjct 530 -----GRQLTIFNTQA 562

>gb|AA984057.1| am76b03.s1 Stratagene schizo brain S11 Homo sapiens cDNA clone IMAGE:1616333 3' similar to TR:Q63376 Q63376 NEUREXIN II-BETA-A PRECURSOR. ;, mRNA sequence. Length=728

Score = 63.9 bits (154), Expect(2) = 4e-21, Method: Compositional matrix adjust. Identities = 42/109 (39%), Positives = 51/109 (47%), Gaps = 31/109 (28%)  
Frame = -2

Query 40 NATLQVDSWPVIERYPA GNNDNERLAIARQRIPYRLGRVVDEWLLDKGRQLTIFNSQATI 99  
N TLQVDSWPV ERY AG RQLTIFNSQA I  
Sbjct 508 NRTLQVDSWPVNERAAG-----RQLTIFNSQA AI 419  
Query 100 IIGGKEQGQPFQGLSGLYYNGLKVLNMAAENDANIAIVGNVRLVGEVP 148  
I G++QG+P + G + AE+D N+ ++RLVGE P  
Sbjct 418 KIVGRDQGRPSRVPVCPASTTMGSRCC-AGAESDPNVRTECHLRLVGE GP 275



Mus Musculus (4/27 splice variants)

| Sequences producing significant alignments: |            |                                                   | Score<br>(Bits) | E<br>Value |
|---------------------------------------------|------------|---------------------------------------------------|-----------------|------------|
| gb                                          | CF553803.1 | AGENCOURT_15611286 Organ of Corti Mus musculus... | 283             | 7e-94      |
| gb                                          | CB249743.1 | UI-M-EX0-by1-b-10-0-UI.r1 NIH_BMAP_EX0 Mus mus... | 253             | 1e-82      |
| gb                                          | BM944179.1 | UI-M-EH0p-bvq-g-21-0-UI.r1 NIH_BMAP_EH0p Mus m... | 249             | 8e-82      |
| gb                                          | BM950483.1 | UI-M-EH0p-buu-o-21-0-UI.r1 NIH_BMAP_EH0p Mus m... | 244             | 1e-80      |
| gb                                          | DT927517.1 | PCRS30340 Hematopoietic stem cells Mus musculu... | 241             | 1e-78      |
| gb                                          | CX208193.1 | MNS13294 Mouse Neurosphere Normalized cDNA lib... | 239             | 4e-78      |
| gb                                          | CX217204.1 | MNS31265 Mouse Neurosphere Normalized cDNA lib... | 236             | 5e-77      |
| gb                                          | DT924042.1 | PCRS10316 Hematopoietic stem cells Mus musculu... | 233             | 4e-76      |
| gb                                          | DT925356.1 | PCRS50408 Hematopoietic stem cells Mus musculu... | 233             | 7e-76      |
| gb                                          | BU056634.1 | UI-M-FO0-cac-b-20-0-UI.r1 NIH_BMAP_FO0 Mus mus... | 229             | 7e-74      |
| gb                                          | CX206076.1 | MNS10169 Mouse Neurosphere Normalized cDNA lib... | 226             | 3e-73      |
| gb                                          | CF743000.1 | UI-M-GV0-cln-a-15-0-UI.r1 NIH_BMAP_GV0 Mus mus... | 226             | 9e-73      |
| gb                                          | CF743053.1 | UI-M-GV0-cln-k-17-0-UI.r1 NIH_BMAP_GV0 Mus mus... | 226             | 3e-72      |
| gb                                          | CX202063.1 | MNS03719 Mouse Neurosphere Normalized cDNA lib... | 221             | 3e-71      |
| gb                                          | CF743182.1 | UI-M-GV0-clo-c-19-0-UI.r1 NIH_BMAP_GV0 Mus mus... | 199             | 2e-61      |
| gb                                          | CX217588.1 | MNS31680 Mouse Neurosphere Normalized cDNA lib... | 153             | 2e-60      |
| gb                                          | CA328232.1 | UI-M-FY0-cdb-m-23-0-UI.r1 NIH_BMAP_FY0 Mus mus... | 195             | 3e-60      |
| gb                                          | CX215555.1 | MNS25539 Mouse Neurosphere Normalized cDNA lib... | 187             | 1e-58      |
| gb                                          | CX223578.1 | MNS41923 Mouse Neurosphere Normalized cDNA lib... | 184             | 3e-57      |
| gb                                          | CX199726.1 | MNS08623 Mouse Neurosphere Normalized cDNA lib... | 184             | 3e-56      |
| gb                                          | CX216431.1 | MNS29780 Mouse Neurosphere Normalized cDNA lib... | 182             | 5e-56      |
| gb                                          | DN173237.1 | NMB07261 Mus Musculus Lateral Ventricle Wall C... | 182             | 6e-56      |
| gb                                          | CA327544.1 | UI-M-FY0-ccz-i-02-0-UI.r1 NIH_BMAP_FY0 Mus mus... | 178             | 7e-54      |
| dbj                                         | BB858994.1 | BB858994 RIKEN full-length enriched, brain CR...  | 145             | 5e-42      |
| gb                                          | DT904887.1 | BMSB13606 Hematopoietic stem cells Mus musculu... | 144             | 8e-41      |
| gb                                          | CX220555.1 | MNS36241 Mouse Neurosphere Normalized cDNA lib... | 100             | 2e-37      |
| gb                                          | CX212965.1 | MNS18219 Mouse Neurosphere Normalized cDNA lib... | 129             | 2e-35      |
| gb                                          | CX203319.1 | MNS05584 Mouse Neurosphere Normalized cDNA lib... | 125             | 1e-33      |
| dbj                                         | BP427400.1 | BP427400 Mus musculus cerebellum E18-P56 Mus ...  | 120             | 2e-32      |
| dbj                                         | BB692115.1 | BB692115 RIKEN full-length enriched, 2 days n...  | 119             | 7e-32      |
| dbj                                         | BB695296.1 | BB695296 RIKEN full-length enriched, 2 days n...  | 115             | 2e-30      |
| dbj                                         | BB130803.1 | BB130803 RIKEN full-length enriched, 16 days ...  | 109             | 4e-29      |
| gb                                          | DT915246.1 | BMSB12312 Hematopoietic stem cells Mus musculu... | 111             | 9e-28      |
| dbj                                         | BY632421.1 | BY632421 RIKEN full-length enriched, visual c...  | 105             | 1e-26      |
| gb                                          | DT906469.1 | PCRS50341 Hematopoietic stem cells Mus musculu... | 100             | 5e-25      |

ALIGNMENTS

>gb|CF553803.1| AGENCOURT\_15611286 Organ of Corti Mus musculus cDNA clone  
 IMAGE:30519294 5', mRNA sequence. Length=925

Score = 283 bits (723), Expect = 7e-94, Method: Compositional matrix adjust.  
 Identities = 135/136 (99%), Positives = 136/136 (100%), Gaps = 0/136 (0%)  
 Frame = +2

|       |     |                                                                       |     |
|-------|-----|-----------------------------------------------------------------------|-----|
| Query | 13  | DDIAIEESNAIINDGKYHVFRFTRSGGNATLQVDSWPVIERYPA <b>GNNNDNERLAIARQRIP</b> | 72  |
| Sbjct | 8   | DDIAIEESNAIINDGKYHVFRFTRSGGNATLQVDSWPVIERYPAGNNNDNERLAIARQRIP         | 187 |
| Query | 73  | <b>YRLGRVVDEWLLDKG</b> RQLTIFNSQATIIIGGKEQGQPFQGLSGLYYNGLKVLNMAAEND   | 132 |
| Sbjct | 188 | YRLGRVVDEWLLDKGRQLTIFNSQATIIIGGKEQGQPFQGLSGLYYNGLKVLNMAAEND           | 367 |
| Query | 133 | ANIAIVGNVRLVGEVP 148                                                  |     |
| Sbjct | 368 | ANIAIVGNV+LVGEVP 415                                                  |     |



>gb|CB249743.1| UI-M-EX0-by1-b-10-0-UI.r1 NIH\_BMAP\_EX0 Mus musculus cDNA clone  
IMAGE:5719593 5', mRNA sequence. Length=881

Score = 253 bits (647), Expect = 1e-82, Method: Compositional matrix adjust.  
Identities = 121/148 (82%), Positives = 134/148 (91%), Gaps = 0/148 (0%)  
Frame = +3

Query 1 QGKIGVKFNVGTDDIAIEESNAIINDGKYHVVRFRTRSGGNATLQVDSWPVIERYPA**GNND** 60  
QG +GV FNVGTDDI I+E NAI++DGKYHVVRFRTRSGGNATLQVDSWPV ERYPAGN D  
Sbjct 69 QGTVGVIFNVGTDDITIDEPNNAIVSDGKYHVVRFRTRSGGNATLQVDSWPVNERYPAGNFD 248  
Query 61 **NERLAIARQRIPYRLGRVVDEWLLDKGR**QLTIFNSQATIIIGGKEQGQPFQGGQLSGLYYN 120  
NERLAIARQRIPYRLGRVVDEWLLDKGRQLTIFNSQA I IGG++QG+PFQGG+SGLYYN  
Sbjct 249 NERLAIARQRIPYRLGRVVDEWLLDKGRQLTIFNSQAAIKIGGRDQGRPFQGGVSGLYYN 428  
Query 121 GLKVLNMAAENDANIAIVGNVRLVGEVP 148  
GLKVL +AAE+D N+ G++RLVGE P  
Sbjct 429 GLKVLALAAESDPNVRTEGHLRLVGEVP 512

>gb|BM944179.1| UI-M-EH0p-bvq-g-21-0-UI.r1 NIH\_BMAP\_EH0p Mus musculus cDNA clone  
IMAGE:5695532 5', mRNA sequence. Length=711

Score = 249 bits (636), Expect = 8e-82, Method: Compositional matrix adjust.  
Identities = 119/145 (82%), Positives = 132/145 (91%), Gaps = 0/145 (0%)  
Frame = +2

Query 4 IGVKFNVGTDDIAIEESNAIINDGKYHVVRFRTRSGGNATLQVDSWPVIERYPA**GNNDNER** 63  
+GV FNVGTDDI I+E NAI++DGKYHVVRFRTRSGGNATLQVDSWPV ERYPAGN DNER  
Sbjct 8 VGVIFNVGTDDITIDEPNNAIVSDGKYHVVRFRTRSGGNATLQVDSWPVNERYPAGNFDNER 187  
Query 64 **LAIARQRIPYRLGRVVDEWLLDKGR**QLTIFNSQATIIIGGKEQGQPFQGGQLSGLYYNGLK 123  
LAIARQRIPYRLGRVVDEWLLDKGRQLTIFNSQA I IGG++QG+PFQGG+SGLYYNGLK  
Sbjct 188 LAIARQRIPYRLGRVVDEWLLDKGRQLTIFNSQAAIKIGGRDQGRPFQGGVSGLYYNGLK 367  
Query 124 VLNMAAENDANIAIVGNVRLVGEVP 148  
VL +AAE+D N+ G++RLVGE P  
Sbjct 368 VLALAAESDPNVRTEGHLRLVGEVP 442

>gb|BM950483.1| UI-M-EH0p-buu-o-21-0-UI.r1 NIH\_BMAP\_EH0p Mus musculus cDNA clone  
IMAGE:5687276 5', mRNA sequence. Length=590

Score = 244 bits (624), Expect = 1e-80, Method: Compositional matrix adjust.  
Identities = 118/145 (81%), Positives = 131/145 (90%), Gaps = 0/145 (0%)  
Frame = +1

Query 4 IGVKFNVGTDDIAIEESNAIINDGKYHVVRFRTRSGGNATLQVDSWPVIERYPA**GNNDNER** 63  
+GV FNVGTDDI I+E NAI++DGKYHVVRFRTRSGGNATLQVDSWPV ERYPAGN DNER  
Sbjct 46 LGVIFNVGTDDITIDEPNNAIVSDGKYHVVRFRTRSGGNATLQVDSWPVNERYPAGNFDNER 225  
Query 64 **LAIARQRIPYRLGRVVDEWLLDKGR**QLTIFNSQATIIIGGKEQGQPFQGGQLSGLYYNGLK 123  
LAIARQRIPYRLGRVVDEWLLDKGRQLTIFNSQA I IGG++QG+PFQGG+SGLYYNGLK  
Sbjct 226 LAIARQRIPYRLGRVVDEWLLDKGRQLTIFNSQAAIKIGGRDQGRPFQGGVSGLYYNGLK 405  
Query 124 VLNMAAENDANIAIVGNVRLVGEVP 148  
VL +AAE+D N+ ++RLVGE P  
Sbjct 406 VLALAAESDPNVRTECHLRLVGEVP 480

>gb|DT927517.1| PCRS30340 Hematopoietic stem cells Mus musculus cDNA, mRNA sequence.  
Length=699

Score = 241 bits (615), Expect = 1e-78, Method: Compositional matrix adjust.  
Identities = 116/116 (100%), Positives = 116/116 (100%), Gaps = 0/116 (0%)  
Frame = +2

```
Query 33 RFTRSGGNATLQVDSWPVIERYPAGNNNDNERLAIARQRIPYRLGRVVDEWLLDKGRQLTI 92
Sbjct 2 RFTRSGGNATLQVDSWPVIERYPAGNNNDNERLAIARQRIPYRLGRVVDEWLLDKGRQLTI 181

Query 93 FNSQATIIIGGKEQGQPFQQLSGLYYNGLKVLNMAAENDANIAIVGNVRLVGEVP 148
Sbjct 182 FNSQATIIIGGKEQGQPFQQLSGLYYNGLKVLNMAAENDANIAIVGNVRLVGEVP 349
```

>gb|CX208193.1| MNS13294 Mouse Neurosphere Normalized cDNA library Mus musculus  
cDNA 5', mRNA sequence. Length=670

Score = 239 bits (611), Expect = 4e-78, Method: Compositional matrix adjust.  
Identities = 114/135 (84%), Positives = 125/135 (93%), Gaps = 0/135 (0%)  
Frame = +2

```
Query 1 QGKIGVKFNVGTDDIAIEESNAIINDGKYHVVRFTRSGGNATLQVDSWPVIERYPAGNNND 60
Sbjct 257 QGTVGIVFNVGTDDITIDEPNNAIVSDGKYHVVRFTRSGGNATLQVDSWPVNERYPAGNFD 436

Query 61 NERLAIARQRIPYRLGRVVDEWLLDKGRQLTIFNSQATIIIGGKEQGQPFQQLSGLYYN 120
Sbjct 437 NERLAIARQRIPYRLGRVVDEWLLDKGRQLTIFNSQA I IGG++QG+PFQGG+SGLYYN 616

Query 121 GLKVLNMAAENDANI 135
Sbjct 617 GLKVLALAAESDPNV 661
```

>gb|CX217204.1| MNS31265 Mouse Neurosphere Normalized cDNA library Mus musculus  
cDNA 5', mRNA sequence. Length=642

Score = 236 bits (602), Expect = 5e-77, Method: Compositional matrix adjust.  
Identities = 112/135 (83%), Positives = 123/135 (91%), Gaps = 0/135 (0%)  
Frame = +1

```
Query 1 QGKIGVKFNVGTDDIAIEESNAIINDGKYHVVRFTRSGGNATLQVDSWPVIERYPAGNNND 60
Sbjct 220 HGTVGIVFNVGTDDITIDEPNNAIVSDGKYHVVRFTRSGGNATLQVDSWPVNERYPAGNFD 399

Query 61 NERLAIARQRIPYRLGRVVDEWLLDKGRQLTIFNSQATIIIGGKEQGQPFQQLSGLYYN 120
Sbjct 400 NERLAIARQRIPYRLGRVVDEWLLDKGRQLTIFNSQA I IGG++ G+PFQGG+SGLYYN 579

Query 121 GLKVLNMAAENDANI 135
Sbjct 580 GLKVLALAAESDPNV 624
```

>gb|DT924042.1| PCRS10316 Hematopoietic stem cells Mus musculus cDNA, mRNA sequence.  
Length=563

Score = 233 bits (594), Expect = 4e-76, Method: Compositional matrix adjust.  
Identities = 113/116 (97%), Positives = 113/116 (97%), Gaps = 0/116 (0%)  
Frame = +2

Query 33 RFTRSGGNATLQVDSWPVIERYPAGNNDNERLAIARQRIPYRLGRVVDEWLLDKGRQLTI 92  
Sbjct 2 RFTRSGGNATLQVDSWPVIERYPAGNNDNE AIARQR PYRLGRVVDEWLLDKGRQLTI 181

Query 93 FNSQATIIIGGKEQGQPFQQLSGLYYNGLKVLNMAAENDANIAIVGNVRLVGEVP 148  
Sbjct 182 FNSQATIIIGGKEQGQPFQQLSGLYYNGLKVLNMAAENDANIAIVGNVRLVGEVP 349

>gb|DT925356.1| PCRS50408 Hematopoietic stem cells Mus musculus cDNA, mRNA sequence.  
Length=635

Score = 233 bits (595), Expect = 7e-76, Method: Compositional matrix adjust.  
Identities = 113/116 (97%), Positives = 115/116 (99%), Gaps = 0/116 (0%)  
Frame = +2

Query 33 RFTRSGGNATLQVDSWPVIERYPAGNNDNERLAIARQRIPYRLGRVVDEWLLDKGRQLTI 92  
Sbjct 2 RFTRSGGNATLQVDSWP IERYPAGNNDNERLA+ARQRIPYRLGRVVDEWLLD+GRQLTI 181

Query 93 FNSQATIIIGGKEQGQPFQQLSGLYYNGLKVLNMAAENDANIAIVGNVRLVGEVP 148  
Sbjct 182 FNSQATIIIGGKEQGQPFQQLSGLYYNGLKVLNMAAENDANIAIVGNVRLVGEVP 349

>gb|BU056634.1| UI-M-FO0-cac-b-20-0-UI.r1 NIH\_BMAP\_F00 Mus musculus cDNA clone  
IMAGE:6409267 5', mRNA sequence. Length=710

Score = 229 bits (584), Expect = 7e-74, Method: Compositional matrix adjust.  
Identities = 109/132 (83%), Positives = 119/132 (90%), Gaps = 0/132 (0%)  
Frame = +2

Query 1 QGKIGVKFNVGTDDIAIEESNAIINDGKYHVVRFRTRSGGNATLQVDSWPVIERYPAGNND 60  
Sbjct 314 QG +GV FNVGTDDI I+E NAI++DGKYHVVRFRTRSGGNATLQVDSWPV ERYPAGN D 493

Query 61 NERLAIARQRIPYRLGRVVDEWLLDKGRQLTIFNSQATIIIGGKEQGQPFQQLSGLYYN 120  
Sbjct 494 NERLAIARQRI YRLGRVVDEWLLDKGRQLTIFNSQA I IGG++QG+PF GQ+SGLYY 673

Query 121 GLKVLNMAAEND 132  
Sbjct 674 GLTVLALAAESD 709

>gb|CX206076.1| MNS10169 Mouse Neurosphere Normalized cDNA library Mus musculus  
cDNA 5', mRNA sequence. Length=621

Score = 226 bits (577), Expect = 3e-73, Method: Compositional matrix adjust.  
Identities = 109/125 (87%), Positives = 117/125 (94%), Gaps = 0/125 (0%)  
Frame = +3

Query 1 QGKIGVKFNVGTDDIAIEESNAIINDGKYHVVRFRTRSGGNATLQVDSWPVIERYPAGNND 60  
Sbjct 222 QG +GV FNVGTDDI I+E NAI++DGKYHVVRFRTRSGGNATLQVDSWPV ERYPAGN D 401

Query 61 NERLAIARQRIPYRLGRVVDEWLLDKGRQLTIFNSQATIIIGGKEQGQPFQQLSGLYYN 120  
Sbjct 402 NERLAIARQRI YRLGRVVDEWLLDKGRQLTIFNSQA I IGG++QG+PFQGQ+SGLYYN 581

Query 121 GLKVL 125

Sbjct 582 GLKVL 596

>gb|CF743000.1| UI-M-GV0-cln-a-15-0-UI.r1 NIH\_BMAP\_GV0 Mus musculus cDNA clone  
IMAGE:30616238 5', mRNA sequence. Length=734

Score = 226 bits (577), Expect = 9e-73, Method: Compositional matrix adjust.  
Identities = 118/148 (80%), Positives = 118/148 (80%), Gaps = 30/148 (20%)  
Frame = +2

Query 1 QGKIGVKFNVGTDDIAIEESNAIINDGKYHVRFTRSGGNATLQVDSWPVIERYPA**GNND** 60  
QGKIGVKFNVGTDDIAIEESNAIINDGKYHVRFTRSGGNATLQVDSWPVIERYPAG  
Sbjct 296 QGKIGVKFNVGTDDIAIEESNAIINDGKYHVRFTRSGGNATLQVDSWPVIERYPAG--- 466  
Query 61 **NERLAIARQRIPYRLGRVVDEWLLDKGR**QLTIFNSQATIIIGGKEQGQPFQGLSGLYYN 120  
RQLTIFNSQATIIIGGKEQGQPFQGLSGLYYN  
Sbjct 467 -----RQLTIFNSQATIIIGGKEQGQPFQGLSGLYYN 565  
Query 121 GLKVLNMAAENDANIAIVGNVRLVGEVP 148  
GLKVLNMAAENDANIAIVGNVRLVGEVP  
Sbjct 566 GLKVLNMAAENDANIAIVGNVRLVGEVP 649

>gb|CF743053.1| UI-M-GV0-cln-k-17-0-UI.r1 NIH\_BMAP\_GV0 Mus musculus cDNA clone  
IMAGE:30616480 5', mRNA sequence. Length=751

Score = 226 bits (575), Expect = 3e-72, Method: Compositional matrix adjust.  
Identities = 118/148 (80%), Positives = 118/148 (80%), Gaps = 30/148 (20%)  
Frame = +2

Query 1 QGKIGVKFNVGTDDIAIEESNAIINDGKYHVRFTRSGGNATLQVDSWPVIERYPA**GNND** 60  
QGKIGVKFNVGTDDIAIEESNAIINDGKYHVRFTRSGGNATLQVDSWPVIERYPAG  
Sbjct 296 QGKIGVKFNVGTDDIAIEESNAIINDGKYHVRFTRSGGNATLQVDSWPVIERYPAG--- 466  
Query 61 **NERLAIARQRIPYRLGRVVDEWLLDKGR**QLTIFNSQATIIIGGKEQGQPFQGLSGLYYN 120  
RQLTIFNSQATIIIGGKEQGQPFQGLSGLYYN  
Sbjct 467 -----RQLTIFNSQATIIIGGKEQGQPFQGLSGLYYN 565  
Query 121 GLKVLNMAAENDANIAIVGNVRLVGEVP 148  
GLKVLNMAAENDANIAIVGNVRLVGEVP  
Sbjct 566 GLKVLNMAAENDANIAIVGNVRLVGEVP 649

>gb|CX202063.1| MNS03719 Mouse Neurosphere Normalized cDNA library Mus musculus  
cDNA 5', mRNA sequence. Length=627

Score = 221 bits (564), Expect = 3e-71, Method: Compositional matrix adjust.  
Identities = 106/123 (86%), Positives = 115/123 (93%), Gaps = 0/123 (0%)  
Frame = +2

Query 1 QGKIGVKFNVGTDDIAIEESNAIINDGKYHVRFTRSGGNATLQVDSWPVIERYPA**GNND** 60  
QG +GV FNVGTDDI I+E NAI++DGKYHVRFTRSGGNATLQVDSWPV ERYPAGN D  
Sbjct 227 QGTVGVIFNVGTDDITIDEPNAIIVSDGKYHVRFTRSGGNATLQVDSWPVNERYPAGNFD 406  
Query 61 **NERLAIARQRIPYRLGRVVDEWLLDKGR**QLTIFNSQATIIIGGKEQGQPFQGLSGLYYN 120  
NERLAIARQRIPYRLGRVV+EWLLDKGRQLTIFNSQA I IGG++QG+PFQGG+SGLYYN  
Sbjct 407 NERLAIARQRIPYRLGRVVNEWLLDKGRQLTIFNSQAAIKIGGRDQGRPFQGVVSGLYYN 586  
Query 121 GLK 123  
GLK  
Sbjct 587 GLK 595

>gb|CF743182.1| UI-M-GV0-clo-c-19-0-UI.r1 NIH\_BMAP\_GV0 Mus musculus cDNA clone  
IMAGE:30621282 5', mRNA sequence. Length=833

Score = 199 bits (505), Expect = 2e-61, Method: Compositional matrix adjust.  
Identities = 93/130 (72%), Positives = 111/130 (85%), Gaps = 0/130 (0%)  
Frame = +3

Query 1 QGKIGVKFNVGTDDIAIEESNAIINDGKYHVVRFRTRSGGNATLQVDSWPVIERYPAGNND 60  
QGKIGV FN+GT DI+I+E +NDGKYHVVRFRTR+GGNATLQVD+WPV E YP GN D  
Sbjct 300 QGKIGVVFNIGTVDISIKEERTPVNDGKYHVVRFRTRNGGNATLQVDNWPVNEHYPTGNTD 479

Query 61 NERLAIARQRIPYRLGRVVDEWLLDKGRQLTIFNSQATIIIGGKEQGQPFQGLSGLYYN 120  
NERL + +Q+IP++ R V+EWL +KGRQLTIFN+QA I IGGK++G+ FQGQLSGLYY+  
Sbjct 480 NERLQMVKQKIPFKYNRPVVEEWLQEKGRQLTIFNTQAQIAIGGKDKGRLFQGLSGLYYD 659

Query 121 GLKVLNMAAE 130  
GLKVLNMAAE  
Sbjct 660 GLKVLNMAAE 689

>gb|CX217588.1| MNS31680 Mouse Neurosphere Normalized cDNA library Mus musculus  
cDNA 5', mRNA sequence. Length=765

Score = 153 bits (386), Expect(2) = 2e-60, Method: Compositional matrix adjust.  
Identities = 72/82 (88%), Positives = 76/82 (93%), Gaps = 0/82 (0%)  
Frame = +3

Query 1 QGKIGVKFNVGTDDIAIEESNAIINDGKYHVVRFRTRSGGNATLQVDSWPVIERYPAGNND 60  
QG +GV FNVGTDDI I+E NAI++DGKYHVVRFRTRSGGNATLQVDSWPV ERYPAGN D  
Sbjct 42 QGTVGVIFNVGTDDITIDEPNNAIVSDGKYHVVRFRTRSGGNATLQVDSWPVNERYPAGNFD 221

Query 61 NERLAIARQRIPYRLGRVVDEW 82  
NERLAIARQRIPYRLGRVVDEW  
Sbjct 222 NERLAIARQRIPYRLGRVVDEW 287

>gb|CA328232.1| UI-M-FY0-cdb-m-23-0-UI.r1 NIH\_BMAP\_FY0 Mus musculus cDNA clone  
IMAGE:6827424 5', mRNA sequence. Length=790

Score = 195 bits (496), Expect = 3e-60, Method: Compositional matrix adjust.  
Identities = 93/109 (85%), Positives = 100/109 (92%), Gaps = 0/109 (0%)  
Frame = +1

Query 1 QGKIGVKFNVGTDDIAIEESNAIINDGKYHVVRFRTRSGGNATLQVDSWPVIERYPAGNND 60  
QG +GV FNVGTDDI I+E NAI++DGKYHVVRFRTRSGGNATLQVDSWPV ERYPAGN D  
Sbjct 382 QGTVGVIFNVGTDDITIDEPNNAIVSDGKYHVVRFRTRSGGNATLQVDSWPVNERYPAGNFD 561

Query 61 NERLAIARQRIPYRLGRVVDEWLLDKGRQLTIFNSQATIIIGGKEQGQP 109  
NERLAIARQRIPYRLGRVV EWLLDKGRQLTIFNSQA I IGG++QG+P  
Sbjct 562 NERLAIARQRIPYRLGRVVXEWLLDKGRQLTIFNSQAAIKIGGRDQGRP 708

>gb|CX215555.1| MNS25539 Mouse Neurosphere Normalized cDNA library Mus musculus  
cDNA 5', mRNA sequence. Length=401

Score = 187 bits (474), Expect = 1e-58, Method: Compositional matrix adjust.  
Identities = 90/90 (100%), Positives = 90/90 (100%), Gaps = 0/90 (0%)  
Frame = +1

Query 1 QGKIGVKFNVGTDDIAIEESNAIINDGKYHVVRFRTRSGGNATLQVDSWPVIERYPAGNND 60

```
Sbjct 130 QGKIGVKFNVGTDDIAIEESNAIINDGKYHVVRFRTRSGGNATLQVDSWPVIERYPAGNND 309
Query 61 NERLAIARQRIPYRLGRVVDEWLLDKGRQL 90
NERLAIARQRIPYRLGRVVDEWLLDKGRQL
Sbjct 310 NERLAIARQRIPYRLGRVVDEWLLDKGRQL 399
```

>gb|CX223578.1| MNS41923 Mouse Neurosphere Normalized cDNA library Mus musculus cDNA 5', mRNA sequence. Length=503

Score = 184 bits (467), Expect = 3e-57, Method: Compositional matrix adjust.  
Identities = 89/101 (88%), Positives = 93/101 (92%), Gaps = 0/101 (0%)  
Frame = +1

```
Query 1 QGKIGVKFNVGTDDIAIEESNAIINDGKYHVVRFRTRSGGNATLQVDSWPVIERYPAGNND 60
QG +GV FNVGTDDI I+E NAI++DGKYHVVRFRTRSGGNATLQVDSWPV ERYPAGN D
Sbjct 151 QGTVGVIFNVGTDDITIDEPNNAIVSDGKYHVVRFRTRSGGNATLQVDSWPVNERYPAGNFD 330
Query 61 NERLAIARQRIPYRLGRVVDEWLLDKGRQLTIFNSQATIII 101
NERLAIARQRIPYRLGRVVDEWLLDKGRQLTIFNSQA I I
Sbjct 331 NERLAIARQRIPYRLGRVVDEWLLDKGRQLTIFNSQAAIKI 453
```

>gb|CX199726.1| MNS08623 Mouse Neurosphere Normalized cDNA library Mus musculus cDNA 5', mRNA sequence. Length=747

Score = 184 bits (467), Expect = 3e-56, Method: Compositional matrix adjust.  
Identities = 89/101 (88%), Positives = 93/101 (92%), Gaps = 0/101 (0%)  
Frame = +3

```
Query 1 QGKIGVKFNVGTDDIAIEESNAIINDGKYHVVRFRTRSGGNATLQVDSWPVIERYPAGNND 60
QG +GV FNVGTDDI I+E NAI++DGKYHVVRFRTRSGGNATLQVDSWPV ERYPAGN D
Sbjct 348 QGTVGVIFNVGTDDITIDEPNNAIVSDGKYHVVRFRTRSGGNATLQVDSWPVNERYPAGNFD 527
Query 61 NERLAIARQRIPYRLGRVVDEWLLDKGRQLTIFNSQATIII 101
NERLAIARQRIPYRLGRVVDEWLLDKGRQLTIFNSQA I I
Sbjct 528 NERLAIARQRIPYRLGRVVDEWLLDKGRQLTIFNSQAAIRI 650
```

>gb|CX216431.1| MNS29780 Mouse Neurosphere Normalized cDNA library Mus musculus cDNA 5', mRNA sequence. Length=588

Score = 182 bits (462), Expect = 5e-56, Method: Compositional matrix adjust.  
Identities = 88/101 (87%), Positives = 92/101 (91%), Gaps = 0/101 (0%)  
Frame = +3

```
Query 1 QGKIGVKFNVGTDDIAIEESNAIINDGKYHVVRFRTRSGGNATLQVDSWPVIERYPAGNND 60
QG +GV FNVGTDDI I+E NAI++DGKYHVVRFRTRSGGNATLQVDSWPV ERYPAGN D
Sbjct 240 QGTVGVIFNVGTDDITIDEPNNAIVSDGKYHVVRFRTRSGGNATLQVDSWPVNERYPAGNFD 419
Query 61 NERLAIARQRIPYRLGRVVDEWLLDKGRQLTIFNSQATIII 101
NERLAIARQRIPYRLGRVV EWLLDKGRQLTIFNSQA I I
Sbjct 420 NERLAIARQRIPYRLGRVVHEWLLDKGRQLTIFNSQAAIKI 542
```

>gb|DN173237.1| NMB07261 Mus Musculus Lateral Ventricle Wall C57BL/6 adult Mus musculus cDNA 5', mRNA sequence. Length=631

Score = 182 bits (462), Expect = 6e-56, Method: Compositional matrix adjust.  
Identities = 88/106 (83%), Positives = 97/106 (92%), Gaps = 0/106 (0%)  
Frame = +3

Query 41 ATLOVDSWPVIERYPA**GNNDNERLAIARQRIPYRLGRVVDEWLLDKG**RQLTIFNSQATII 100  
 ATLOVDSWPV ERYPAGN DNERLAIARQRIPYRLGRVVDEWLLDKGRQLTIFNSQA I  
 Sbjct 3 ATLOVDSWPVNERYPAGNFDNERLAIARQRIPYRLGRVVDEWLLDKGRQLTIFNSQAAIK 182

Query 101 IGGKEQGQPFQQLSGLYYNGLKVLNMAAENDANIAIVGNVRLVGE 146  
 IGG++QG+PFQGG+SGLYYNGLKVL +AAE+D N+ G++RLVGE  
 Sbjct 183 IGGRDQGRPFQGVVSGLYYNGKVLALAAESDPNVRTEGHLRLVGE 320

>gb|CA327544.1| UI-M-FY0-ccz-i-02-0-UI.r1 NIH\_BMAP\_FY0 Mus musculus cDNA clone  
 IMAGE:6826539 5', mRNA sequence. Length=766

Score = 178 bits (452), Expect = 7e-54, Method: Compositional matrix adjust.  
 Identities = 92/148 (62%), Positives = 105/148 (71%), Gaps = 30/148 (20%)  
 Frame = +1

Query 1 QGKIGVKFNVTDDIAIEESNAIINDGKYHVVRFTSRGGNATLOVDSWPVIERYPA**GNND** 60  
 QG +GV FNVGTDDI I+E NAI++DGKYHVVRFTSRGGNATLOVDSWPV ERYPA  
 Sbjct 244 QGTVGVIFNVGTDDITIDEPNAIIVSDGKYHVVRFTSRGGNATLOVDSWPVNERYPAAAA 411

Query 61 **NERLAIARQRIPYRLGRVVDEWLLDKG**RQLTIFNSQATIIIGGKEQGQPFQQLSGLYYN 120  
 GRQLTIFNSQA I IGG++QG+PFQGG+SGLYYN  
 Sbjct 412 -----GRQLTIFNSQAAIKIGGRDQGRPFQGVVSGLYYN 513

Query 121 GLKVLNMAAENDANIAIVGNVRLVGEVP 148  
 GLKVL +AAE+D N+ G++RLVGE P  
 Sbjct 514 GLKVLALAAESDPNVRTEGHLRLVGEVP 597

>dbj|BB858994.1| BB858994 RIKEN full-length enriched, brain CRL-1443 BC3H1 cDNA  
 Mus musculus cDNA clone G430003L02 5', mRNA sequence. Length=460

Score = 145 bits (365), Expect = 5e-42, Method: Compositional matrix adjust.  
 Identities = 84/142 (59%), Positives = 94/142 (66%), Gaps = 25/142 (18%)  
 Frame = +1

Query 1 QGKIGVKFNVTDDIAIEESNAIINDGKYHVVRFTSRGGNATLOVDSWPVIERYPA**GNND** 60  
 QGKIGVKFNVTDDIAIEESNAIINDGKYHVVRFTSRGGNATLOVDSWP P  
 Sbjct 70 QGKIGVKFNVTDDIAIEESNAIINDGKYHVVRFTSRGGNATLOVDSWPAYRTLPC---- 237

Query 61 **NERLAIARQ--RIPYRLGRVVDEWLLD-----KGR**QLTIFNSQATII-----IGGKEQG 107  
 +Q R P+RL + E+ +D G +SQ++I + GK +  
 Sbjct 238 -----RKQ\*\*RAPWRL--LDSEFHIDLVE\*LMNGYSTKGVSSQSSIAKQP\*\*LAGKSRA 393

Query 108 QPFQQLSGLYYNGLKVLNMAA 129  
 PFQQLSGLYYNGLKVLNMAA  
 Sbjct 394 SPFQQLSGLYYNGLKVLNMAA 459

>gb|DT904887.1| BMSB13606 Hematopoietic stem cells Mus musculus cDNA, mRNA sequence.  
 Length=721

Score = 144 bits (364), Expect = 8e-41, Method: Compositional matrix adjust.  
 Identities = 69/69 (100%), Positives = 69/69 (100%), Gaps = 0/69 (0%)  
 Frame = +3

Query 4 IGKFNVTDDIAIEESNAIINDGKYHVVRFTSRGGNATLOVDSWPVIERYPA**GNNDNER** 63  
 IGKFNVTDDIAIEESNAIINDGKYHVVRFTSRGGNATLOVDSWPVIERYPAGNNDNER  
 Sbjct 513 IGKFNVTDDIAIEESNAIINDGKYHVVRFTSRGGNATLOVDSWPVIERYPAGNNDNER 692

Query 64 **LAIARQRIP** 72



LAIARQRIP  
Sbjct 693 LAIARQRIP 719

>gb|CX220555.1| MNS36241 Mouse Neurosphere Normalized cDNA library Mus musculus  
cDNA 5', mRNA sequence. Length=854

Score = 100 bits (250), Expect(2) = 2e-37, Method: Compositional matrix adjust.  
Identities = 60/108 (56%), Positives = 64/108 (59%), Gaps = 31/108 (29%)  
Frame = +1

Query 37 SGGNATLQVDSWPVIERYPAGNNNDNERLAIARQRIPYRLGRVVDEWLLDKGRQLTIFNSQ 96  
SGGNATLQVDSWPVIERYPAG RQLTIFNSQ  
Sbjct 454 SGGNATLQVDSWPVIERYPAG-----RQLTIFNSQ 543  
Query 97 ATIIIIGGKEQGQPFQGLSGLYYNGLKVLNMAA-ENDANIAIVGNVRL 143  
ATIIIIGGKEQGQPFQGLSGLYYNG + + E + GNV+L  
Sbjct 544 ATIIIIGGKEQGQPFQGLSGLYYNGFESSEYGSRERCQHRHSGGNVKL 687

>gb|CX203319.1| MNS05584 Mouse Neurosphere Normalized cDNA library Mus musculus  
cDNA 5', mRNA sequence. Length=645

Score = 125 bits (313), Expect = 1e-33, Method: Compositional matrix adjust.  
Identities = 60/66 (91%), Positives = 62/66 (94%), Gaps = 0/66 (0%)  
Frame = +2

Query 34 FTRSGGNATLQVDSWPVIERYPAGNNNDNERLAIARQRIPYRLGRVVDEWLLDKGRQLTIF 93  
+RSGGNATLQVDSWPV ERYPAGN DNERLAIARQRIPYRLGRVV+EWLLDKGRQLTIF  
Sbjct 446 LSRSGGNATLQVDSWPVNERYPAGNFDNERLAIARQRIPYRLGRVVNEWLLDKGRQLTIF 625  
Query 94 NSQATI 99  
NSQA I  
Sbjct 626 NSQAAI 643

Xenopus (1/9 splice variants)

| Sequences producing significant alignments: |            |                                                    | Score  | E     |
|---------------------------------------------|------------|----------------------------------------------------|--------|-------|
|                                             |            |                                                    | (Bits) | Value |
| gb                                          | CX806523.1 | JGI_CAAJ17809.fwd NIH_XGC_tropBrn2 Xenopus (Si...  | 258    | 1e-84 |
| gb                                          | CX390033.2 | JGI_XZT38012.fwd NIH_XGC_tropTad5 Xenopus (Sil...  | 254    | 1e-83 |
| gb                                          | CX842791.2 | JGI_CAAK10710.rev NIH_XGC_tropBrn3 Xenopus (Si...  | 228    | 3e-73 |
| gb                                          | CX849796.2 | JGI_CAAL6519.rev NIH_XGC_tropBrn4 Xenopus (Sil...  | 210    | 5e-66 |
| gb                                          | EL657246.1 | AGENCOURT_103340710 NICHD_XGC_tropInt_62 Xenop...  | 210    | 6e-66 |
| gb                                          | CX875450.1 | JGI_CAAL11566.fwd NIH_XGC_tropBrn4 Xenopus (Si...  | 203    | 9e-64 |
| gb                                          | CX802944.2 | JGI_CAAJ15807.rev NIH_XGC_tropBrn2 Xenopus (Si...  | 200    | 2e-62 |
| gb                                          | CX849797.1 | JGI_CAAL6519.fwd NIH_XGC_tropBrn4 Xenopus (Sil...  | 198    | 3e-61 |
| gb                                          | CX881742.2 | JGI_CAAL20915.rev NIH_XGC_tropBrn4 Xenopus (Si...  | 137    | 5e-38 |
| gb                                          | CX806710.2 | JGI_CAAJ17915.rev NIH_XGC_tropBrn2 Xenopus (Si...  | 111    | 4e-28 |
| gb                                          | CN079641.1 | EC2BBA16DC06.b1 Xenopus tropicalis xtbs plasmid... | 109    | 2e-27 |
| gb                                          | EL638922.1 | CBTC435.fwd NICHD_XGC_tropBonel Xenopus (Silur...  | 101    | 1e-24 |
| gb                                          | CX879987.2 | JGI_CAAL19921.rev NIH_XGC_tropBrn4 Xenopus (Si...  | 99.0   | 6e-24 |
| gb                                          | CX814841.2 | JGI_CAAK651.rev NIH_XGC_tropBrn3 Xenopus (Silu...  | 99.0   | 6e-24 |
| gb                                          | CX879988.1 | JGI_CAAL19921.fwd NIH_XGC_tropBrn4 Xenopus (Si...  | 97.4   | 5e-23 |
| gb                                          | CX799128.1 | JGI_CAAJ13677.fwd NIH_XGC_tropBrn2 Xenopus (Si...  | 88.2   | 9e-20 |

ALIGNMENTS

>gb|CX806523.1| JGI\_CAAJ17809.fwd NIH\_XGC\_tropBrn2 Xenopus (Silurana) tropicalis  
cDNA clone IMAGE:7647663 5', mRNA sequence. Length=839

Score = 258 bits (658), Expect = 1e-84, Method: Compositional matrix adjust.  
Identities = 120/148 (81%), Positives = 135/148 (91%), Gaps = 0/148 (0%)  
Frame = +1

```

Query 1 QGKIGVKFNVGTDDIAIEESNAIINDGKYHVVRFRTRSGGNATLQVDSWPVIERYPAGNND 60
      QG +GV FNVGTDDI IEE A+++DGKYHVVRFRTRSGGNATLQVDSWPV ERYPAGNND D
Sbjct 118 QGTVGIVFNVGTDDITIEEPGALVSDGKYHVVRFRTRSGGNATLQVDSWPVNERYPAGNPD 297

Query 61 NERLAIARQRIPYRLGRVVDEWLLDKGRQLTIFNSQATIIIGGKEQGQPFQGGQLSGLYYN 120
      +ERLA+ARQRIPYRLGRVVDEWLLDKGRQLTIFNSQA I +GGK+QG+PFQGGQ+SGLYYN
Sbjct 298 SERLALARQRIPYRLGRVVDEWLLDKGRQLTIFNSQAEIKVGGKDQGRPFQGGQISGLYYN 477

Query 121 GLKVLNMAAENDANIAIVGNVRLVGEVP 148
      GLKVL++AAEND N+ GN+RL+GEVP
Sbjct 478 GLKVLSLAAENDPNVKTEGNLRLIGEVP 561

```

>gb|CX390033.2| JGI\_XZT38012.fwd NIH\_XGC\_tropTad5 Xenopus (Silurana) tropicalis  
cDNA clone IMAGE:7614026 5', mRNA sequence. Length=818

Score = 254 bits (650), Expect = 1e-83, Method: Compositional matrix adjust.  
Identities = 121/135 (90%), Positives = 128/135 (95%), Gaps = 0/135 (0%)  
Frame = +2

```

Query 14 DIAIEESNAIINDGKYHVVRFRTRSGGNATLQVDSWPVIERYPAGNNDNERLAIARQRIPY 73
      DI+IEE NAIINDGKYH VRFRTRSGGNATL VD+WPVIERYPAGNNDNERLAIARQRIPY
Sbjct 2 DISIEEVNAIINDGKYHTVFRTRSGGNATLHVDNWPVIERYPAGNNDNERLAIARQRIPY 181

Query 74 RLGRVVDEWLLDKGRQLTIFNSQATIIIGGKEQGQPFQGGQLSGLYYNGLKVLNMAAENDA 133
      RLGRVVD+WLLDKGRQLTIFNSQATI IGGK+QGQPFQGGQLSGLYYNGLKVLNMAAEN+
Sbjct 182 RLGRVVDWLLDKGRQLTIFNSQATIKIGGKDQGGQPFQGGQLSGLYYNGLKVLNMAAENNP 361

Query 134 NIAIVGNVRLVGEVP 148
      +I I GNVRLVG+VP
Sbjct 362 DIVIEGNVRLVGDVP 406

```

>gb|CX842791.2| JGI\_CAAK10710.rev NIH\_XGC\_tropBrn3 Xenopus (Silurana) tropicalis  
cDNA clone IMAGE:7661344 3', mRNA sequence. Length=831

Score = 228 bits (581), Expect = 3e-73, Method: Compositional matrix adjust.  
Identities = 107/119 (90%), Positives = 113/119 (95%), Gaps = 0/119 (0%)  
Frame = -1

Query 30 HVVRFTRSGGNATLQVDSWPVIERYPA**GNNDNERLAIARQRIPYRLGRVVDEWLLDKGR**Q 89  
H VRFTRSGGNATL VD+WPVIERYYPAGNNDNERLAIARQRIPYRLGRVVD+WLLDKGRQ  
Sbjct 831 HTVRFTRSGGNATLHVDNWPVIERYYPAGNNDNERLAIARQRIPYRLGRVVDDWLLDKGRQ 652

Query 90 LTIFNSQATIIIGGKEQGQPFQQLSGLYYNGLKVLNMAAENDANIAIVGNVRLVGEVP 148  
LTIFNSQATI IGGK+QGQPFQQLSGLYYNGLKVLNMAAEN+ +I I GNVRLVG+VP  
Sbjct 651 LTIFNSQATIKIGGKDQGQPFQQLSGLYYNGLKVLNMAAENNPDIIVIEGNVRLVGDVP 475

>gb|CX849796.2| JGI\_CAAL6519.rev NIH\_XGC\_tropBrn4 Xenopus (Silurana) tropicalis  
cDNA clone IMAGE:7664856 3', mRNA sequence. Length=852

Score = 210 bits (534), Expect = 5e-66, Method: Compositional matrix adjust.  
Identities = 100/115 (87%), Positives = 106/115 (92%), Gaps = 0/115 (0%)  
Frame = -1

Query 34 FTRSGGNATLQVDSWPVIERYPA**GNNDNERLAIARQRIPYRLGRVVDEWLLDKGR**QLTIF 93  
F GNATL VD+WPVIERYYPAGNNDNERLAIARQRIPYRLGRVVD+WLLDKGRQLTIF  
Sbjct 810 FYAKWGNATLHVDNWPVIERYYPAGNNDNERLAIARQRIPYRLGRVVDDWLLDKGRQLTIF 631

Query 94 NSQATIIIGGKEQGQPFQQLSGLYYNGLKVLNMAAENDANIAIVGNVRLVGEVP 148  
NSQATI IGGK+QGQPFQQLSGLYYNGLKVLNMAAEN+ +I I GNVRLVG+VP  
Sbjct 630 NSQATIKIGGKDQGQPFQQLSGLYYNGLKVLNMAAENNPDIIVIEGNVRLVGDVP 466

Score = 36.6 bits (83), Expect = 0.16, Method: Compositional matrix adjust.  
Identities = 16/18 (89%), Positives = 16/18 (89%), Gaps = 0/18 (0%)  
Frame = -2

Query 21 NAIINDGKYHVRFTRSG 38  
NAIINDGK H VRFTRSG  
Sbjct 848 NAIINDGKSHTVRFTRSG 795

>gb|EL657246.1| AGENCOURT\_103340710 NICHD\_XGC\_tropInt\_62 Xenopus (Silurana)  
tropicalis cDNA clone IMAGE:8956924 5', mRNA sequence. Length=879

Score = 210 bits (534), Expect = 6e-66, Method: Compositional matrix adjust.  
Identities = 100/115 (87%), Positives = 107/115 (93%), Gaps = 0/115 (0%)  
Frame = +1

Query 34 FTRSGGNATLQVDSWPVIERYPA**GNNDNERLAIARQRIPYRLGRVVDEWLLDKGR**QLTIF 93  
+ GGNATL VD+WPVIERYYPAGNNDNERLAIARQRIPYRLGRVVD+WLLDKGRQLTIF  
Sbjct 7 YCEVGGNATLHVDNWPVIERYYPAGNNDNERLAIARQRIPYRLGRVVDDWLLDKGRQLTIF 186

Query 94 NSQATIIIGGKEQGQPFQQLSGLYYNGLKVLNMAAENDANIAIVGNVRLVGEVP 148  
NSQATI IGGK+QGQPFQQLSGLYYNGLKVLNMAAEN+ +I I GNVRLVG+VP  
Sbjct 187 NSQATIKIGGKDQGQPFQQLSGLYYNGLKVLNMAAENNPDIIVIEGNVRLVGDVP 351

>gb|CX875450.1| JGI\_CAAL11566.fwd NIH\_XGC\_tropBrn4 Xenopus (Silurana) tropicalis  
cDNA clone IMAGE:7669381 5', mRNA sequence. Length=766

Score = 203 bits (517), Expect = 9e-64, Method: Compositional matrix adjust.

Identities = 105/148 (71%), Positives = 111/148 (75%), Gaps = 30/148 (20%)  
Frame = +3

```
Query 1 QGKIGVKFNVGTDDIAIEESNAIINDGKYHVRFTRSGGNATLQVDSWPVIERYPAGNND 60
          QGKIGVKFNVGTDDI+IEE NAIINDGKYH VRFTRSGGNATL VD+WPVIERYPA
Sbjct 3 QGKIGVKFNVGTDDISIEEVNAIINDGKYHTVRFTRSGGNATLHVDNWPVIERYPA---- 170

Query 61 NERLAIARQRIPYRLGRVVDEWLLDKGRQLTIFNSQATIIIGGKEQGQPFQQLSGLYYN 120
          GRQLTIFNSQATI IGGK+QGQPFQQLSGLYYN
Sbjct 171 -----GRQLTIFNSQATIKIGGKDQGQPFQQLSGLYYN 272

Query 121 GLKVLNMAAENDANIAIVGNVRLVGEVP 148
          GLKVLNMAAEN+ +I I GNVRLVG+VP
Sbjct 273 GLKVLNMAAENNPDIVIEGNVRLVGDVP 356
```

>gb|CX802944.2| JGI\_CAAJ15807.rev NIH\_XGC\_tropBrn2 Xenopus (Silurana) tropicalis  
cDNA clone IMAGE:7646009 3', mRNA sequence. Length=791

Score = 200 bits (509), Expect = 2e-62, Method: Compositional matrix adjust.  
Identities = 94/105 (90%), Positives = 100/105 (95%), Gaps = 0/105 (0%)  
Frame = -3

```
Query 44 QVDSWPVIERYPAGNNDNERLAIARQRIPYRLGRVVDEWLLDKGRQLTIFNSQATIIIGG 103
          VD+WPVIERYPAGNNDNERLAIARQRIPYRLGRVVD+WLLDKGRQLTIFNSQATI IGG
Sbjct 789 HVDNWPVIERYPAGNNDNERLAIARQRIPYRLGRVVDWLLDKGRQLTIFNSQATIKIGG 610

Query 104 KEQGQPFQQLSGLYYNGLKVLNMAAENDANIAIVGNVRLVGEVP 148
          K+QGQPFQQLSGLYYNGLKVLNMAAEN+ +I I GNVRLVG+VP
Sbjct 609 KDQGQPFQQLSGLYYNGLKVLNMAAENNPDIVIEGNVRLVGDVP 475
```

>gb|CX849797.1| JGI\_CAAL6519.fwd NIH\_XGC\_tropBrn4 Xenopus (Silurana) tropicalis  
cDNA clone IMAGE:7664856 5', mRNA sequence. Length=922

Score = 198 bits (504), Expect = 3e-61, Method: Compositional matrix adjust.  
Identities = 95/107 (89%), Positives = 101/107 (94%), Gaps = 0/107 (0%)  
Frame = +1

```
Query 1 QGKIGVKFNVGTDDIAIEESNAIINDGKYHVRFTRSGGNATLQVDSWPVIERYPAGNND 60
          QGKIGVKFNVGTDDI+IEE NAIINDGKYH VRFTRSGGNATL VD+WPVIERYPAG ND
Sbjct 565 QGKIGVKFNVGTDDISIEEVNAIINDGKYHTVRFTRSGGNATLHVDNWPVIERYPAGXND 744

Query 61 NERLAIARQRIPYRLGRVVDEWLLDKGRQLTIFNSQATIIIGGKEQG 107
          NERLAIARQRIPYRLGRVVD+WLLDKGRQLTIF+SQ+TI IGG+ QG
Sbjct 745 NERLAIARQRIPYRLGRVVDWLLDKGRQLTIFHSQSTIKIGGEGQG 885
```

>gb|CX881742.2| JGI\_CAAL20915.rev NIH\_XGC\_tropBrn4 Xenopus (Silurana) tropicalis  
cDNA clone IMAGE:7672727 3', mRNA sequence. Length=846

Score = 137 bits (346), Expect = 5e-38, Method: Compositional matrix adjust.  
Identities = 65/75 (87%), Positives = 70/75 (93%), Gaps = 0/75 (0%)  
Frame = -1

```
Query 74 RLGRVVDEWLLDKGRQLTIFNSQATIIIGGKEQGQPFQQLSGLYYNGLKVLNMAAENDA 133
          RLGRVVD+WLLDKGRQLTIFN QATI IGGK+QGQPFQQLSGLYYNGLKVLNMAAEN+
Sbjct 846 RLGRVVDWLLDKGRQLTIFNXQATIKIGGKDQGQPFQQLSGLYYNGLKVLNMAAENNP 667

Query 134 NIAIVGNVRLVGEVP 148
          +I I GNVRLVG+VP
Sbjct 666 DIVIEGNVRLVGDVP 622
```

Danio rerio (1/6 splice variants)

| Sequences producing significant alignments: |                               |                                       | Score  | E     |
|---------------------------------------------|-------------------------------|---------------------------------------|--------|-------|
|                                             |                               |                                       | (Bits) | Value |
| gb CN505896.1                               | AGENCOURT_22422788 NIH_ZGC_9  | Danio rerio cDNA ...                  | 230    | 9e-74 |
| gb EB940169.1                               | 9541915 ZF34                  | Danio rerio cDNA clone 3410906, m...  | 205    | 2e-65 |
| gb DN896482.1                               | nap10b06.y1                   | Zebrafish anterior segment (minus ... | 169    | 8e-51 |
| gb EG574210.1                               | AGENCOURT_88150324 NIH_ZGC_26 | Danio rerio cDNA...                   | 152    | 5e-44 |
| gb EB962033.1                               | 14363019 ZF35XL               | Danio rerio cDNA clone 3866436...     | 128    | 8e-37 |
| gb EB961180.1                               | 14363301 ZF35XL               | Danio rerio cDNA clone 3866772...     | 111    | 6e-30 |
| gb EB923101.1                               | 12401429 ZF31                 | Danio rerio cDNA clone 3275619, ...   | 59.3   | 4e-10 |
| emb AL914040.1                              | AL914040 PJR-Z1+Z2            | Danio rerio cDNA clone 088...         | 34.7   | 0.34  |

ALIGNMENTS

>gb|CN505896.1| AGENCOURT\_22422788 NIH\_ZGC\_9 Danio rerio cDNA clone IMAGE:7275113  
5', mRNA sequence. Length=947

Score = 230 bits (587), Expect = 9e-74, Method: Compositional matrix adjust.  
Identities = 110/148 (74%), Positives = 127/148 (86%), Gaps = 0/148 (0%)  
Frame = +3

```

Query 1 QGKIGVKFNVGTDDIAIEESNAIINDGKYHVVRFRTRSGGNATLQVDSWPVIERYPAGNND 60
Sbjct 330 QGK+GV FNVGTDDI I+E +NDGKYHVVRFRTRSGGNATLQVD+ PVIER+P+GN D 509
Query 61 NERLAIARQRIPYRLGRVVDEWLLDKGRQLTIFNSQATIIIGGKEQGQPFQGLSGLYYN 120
Sbjct 510 NERLAIARQRIPYRLGRVVDEWLLDKGRQLTIFNSQA I +GG+++G+PF GQ+S LYYN 689
Query 121 GLKVLNMAAENDANIAIIVGNVRLVGEVP 148
Sbjct 690 GL+VL +AAE + N+ + G LVGE P 773

```

>gb|EB940169.1| 9541915 ZF34 Danio rerio cDNA clone 3410906, mRNA sequence.  
Length=620

Score = 205 bits (522), Expect = 2e-65, Method: Compositional matrix adjust.  
Identities = 94/141 (67%), Positives = 120/141 (85%), Gaps = 0/141 (0%)  
Frame = +1

```

Query 1 QGKIGVKFNVGTDDIAIEESNAIINDGKYHVVRFRTRSGGNATLQVDSWPVIERYPAGNND 60
Sbjct 196 QGKIGV FN+GT DI ++ES+ +NDGKYHVVRFRTR+GGNATLQVD+W + E +P+GN+D 375
Query 61 NERLAIARQRIPYRLGRVVDEWLLDKGRQLTIFNSQATIIIGGKEQGQPFQGLSGLYYN 120
Sbjct 376 NER+ +A ++IP++ R V+EWL +KGRQLTIFN+QATI IGG ++ +PFQGLSGLYYN 555
Query 121 GLKVLNMAAENDANIAIIVGNV 141
Sbjct 556 GLKVLNMAA+ + NI I G+V 618

```

>gb|DN896482.1| nap10b06.y1 Zebrafish anterior segment (minus lens). Unnormalized  
(nap) Danio rerio cDNA clone nap10b06 5', mRNA sequence. Length=697

Score = 169 bits (427), Expect = 8e-51, Method: Compositional matrix adjust.  
Identities = 89/149 (60%), Positives = 102/149 (68%), Gaps = 31/149 (21%)  
Frame = +3

Query 1 QGKIGVKFNVTDDIAIEESNAIINDGKYHVVRFTSRGGNATLQVDSWPVIERYPA**GNND** 60  
 +G I V FNVGTDDI IEE++ +NDGKYH+VRFTRSGGNATLQVD PVIERYP+  
 Sbjct 120 RGNIKVVFNVGTDDINIEETS~~SKFVNDGKYHIVRFTRSGGNATLQVDDL~~PVIERYPS---- 287

Query 61 **NERLAIARQRIPYRLGRVVDEWLLDK**GRQLTIFNSQATIIIGGKEQG-QPFQQLSGLYY 119  
 GRQLTIFNSQ TI IGG E+G +PFQQLSGLYY  
 Sbjct 288 -----GRQLTIFNSQTTIKIGGWEKGSRPFQQLSGLYY 389

Query 120 NGLKVLNMAAENDANIAIVGNVRLVGEVP 148  
 NGLKVLNMAAE D N+ + G+ RLVG++P  
 Sbjct 390 NGLKVLNMAAEGDPNVRVEGSARLVGDMP 476

>gb|EG574210.1| AGENCOURT\_88150324 NIH\_ZGC\_26 Danio rerio cDNA clone IMAGE:8766761  
 5', mRNA sequence. Length=829

Score = 152 bits (385), Expect = 5e-44, Method: Compositional matrix adjust.  
 Identities = 71/86 (83%), Positives = 80/86 (93%), Gaps = 0/86 (0%)  
 Frame = +3

Query 1 QGKIGVKFNVTDDIAIEESNAIINDGKYHVVRFTSRGGNATLQVDSWPVIERYPA**GNND** 60  
 +G++GV FNVGTDDI IEES +++DGKYHVVRFTSRGGNATLQVD+ PVIER+PAGN D  
 Sbjct 420 RGRVGVIFNVGTDDIVIEESGVMVSDGKYHVVRFTSRGGNATLQVDNLPVIERFPAGNFD 599

Query 61 **NERLAIARQRIPYRLGRVVDEWLLDK** 86  
 +ERLAIARQRIPYRLGRVVDEWLLDK  
 Sbjct 600 SERLAIARQRIPYRLGRVVDEWLLDK 677

>gb|EB962033.1| 14363019 ZF35XL Danio rerio cDNA clone 3866436, mRNA sequence.  
 Length=247

Score = 128 bits (322), Expect = 8e-37, Method: Compositional matrix adjust.  
 Identities = 58/78 (74%), Positives = 70/78 (90%), Gaps = 0/78 (0%)  
 Frame = +1

Query 71 **IPYRLGRVVDEWLLDK**GRQLTIFNSQATIIIGGKEQGQPFQQLSGLYYNGLKVLNMAAE 130  
 IPYRLGRVVDEWLLDKGRQLTIFNSQA I +GG+++G+PFQGG+SGLYYNGL+VL +AAE  
 Sbjct 1 IPYRLGRVVDEWLLDKGRQLTIFNSQAAIKVGGQDKRPFQGISGLYYNGLQVLKLAEE 180

Query 131 NDANIAIVGNVRLVGEVP 148  
 D N+ + GN+RLVG+ P  
 Sbjct 181 GDPNVQVAGNLRRLVGDAP 234

>gb|EB961180.1| 14363301 ZF35XL Danio rerio cDNA clone 3866772, mRNA sequence.  
 Length=318

Score = 111 bits (277), Expect = 6e-30, Method: Compositional matrix adjust.  
 Identities = 47/77 (61%), Positives = 64/77 (83%), Gaps = 0/77 (0%)  
 Frame = +2

Query 1 QGKIGVKFNVTDDIAIEESNAIINDGKYHVVRFTSRGGNATLQVDSWPVIERYPA**GNND** 60  
 QGKIGV FN+GT DI ++ES+ +NDGKYHVVRFTSR+GGNATLQVD+W + E +P+ N+D  
 Sbjct 83 QGKIGVTFNIGTADITVQESSTAVNDGKYHVVRFTSRNGGNATLQVDNWAINEHFPSXNSD 262

Query 61 **NERLAIARQRIPYRLGR** 77  
 NER+ +A ++IP++ R  
 Sbjct 263 NERIQMANKKIPFQYAR 313

CIONA (0/2 splice variants)

Sequences producing significant alignments: (Bits) Value

| dbj | AV990413.1 | AV990413 Nori Satoh unpublished cDNA library,... | 102  | 3e-25 |
|-----|------------|--------------------------------------------------|------|-------|
| dbj | BW351510.1 | BW351510 Yutaka Satou unpublished cDNA librar... | 92.0 | 1e-21 |
| dbj | AV854354.1 | AV854354 Nori Satoh unpublished cDNA library,... | 31.6 | 2.6   |
| dbj | AV854371.1 | AV854371 Nori Satoh unpublished cDNA library,... | 31.6 | 3.7   |

>dbj|AV990413.1| AV990413 Nori Satoh unpublished cDNA library, larva Ciona intestinalis  
cDNA clone cilv22i22 5', mRNA sequence. Length=692

Score = 102 bits (253), Expect = 3e-25, Method: Compositional matrix adjust.  
Identities = 54/156 (35%), Positives = 88/156 (56%), Gaps = 19/156 (12%)  
Frame = +1

|       |     |                                                              |     |
|-------|-----|--------------------------------------------------------------|-----|
| Query | 8   | FNVGTDDIAIEESNAIINDGKYHVVRFTSRGGNATLQVDSWPVIERYPAGNNDNERLAIA | 67  |
|       |     | FN+G D+ ++E ++ ++DG+YH VR R NATL+VD+WP G + +R A+A            |     |
| Sbjct | 25  | FNIGNSDVKLQE-HSPVSDGQYHTVRRKWMNATLRVDNWPERTATTTGGS-RDRFALA   | 198 |
| Query | 68  | RQRIPYRLGRVVDEWLLDKGRQLTIFNSQATIIIGGK-EQGQP-----F            | 110 |
|       |     | + IP + V+ WL K T+FNSQ+ I IGG +Q P F                          |     |
| Sbjct | 199 | KPSIPTSVLSTVETWLRSEKEYSNTVFNSQSVIQIGLLDQSSPYLNSMRSKRSPGIRKAF | 378 |
| Query | 111 | QGQLSGLYYNGLKVLNMAAENDANIAIVGNVRLVGE                         | 146 |
|       |     | GQ+ G ++N ++V +AA+ D ++ ++G+V ++GE                           |     |
| Sbjct | 379 | HGQMMGFFFNDVRFQLAAQGDPSVQLIGDVEIIGE                          | 486 |

>dbj|BW351510.1| BW351510 Yutaka Satou unpublished cDNA library, embryo whole animal Ciona intestinalis cDNA clone ciem848m04 5', mRNA sequence. Length=623

Score = 92.0 bits (227), Expect = 1e-21, Method: Compositional matrix adjust.  
Identities = 49/139 (35%), Positives = 76/139 (55%), Gaps = 18/139 (13%)  
Frame = +1

|       |     |                                                              |     |
|-------|-----|--------------------------------------------------------------|-----|
| Query | 25  | NDGKYHVVRFTSRGGNATLQVDSWPVIERYPAGNNDNERLAIARQRIPYRLGRVVDEWLL | 84  |
|       |     | +DG+YH VR R NATL+VD+WP G + +R A+A+ IP + V+ WL                |     |
| Sbjct | 1   | SDGQYHTVRRKWMNATLRVDNWPERTATTTGGS-RDRFALAKPSIPTSVLSTVETWLR   | 177 |
| Query | 85  | DKGRQLTIFNSQATIIIGGK-EQGQP-----FQGQLSGLYYNGLKVLNM            | 127 |
|       |     | K T+FNSQ+ I IGG +Q P F GQ+ G ++N ++V +                       |     |
| Sbjct | 178 | SKEYSNTVFNSQSVIQIGLLDQSSPYLNSMRSKRSPGIRKAFHGQMMGFFFNDVRFQL   | 357 |
| Query | 128 | AAENDANIAIVGNVRLVGE                                          | 146 |
|       |     | AA+ D ++ ++G+V ++GE                                          |     |
| Sbjct | 358 | AAQGDPSVQLIGDVEIIGE                                          | 414 |
